# Supplementary material for: Charcoal morphologies and morphometrics of a Eurasian grass-dominated system for robust interpretation of past fuel and fire type
Source: Copernicus journal article supplement (doi:10.5194/bg-20-5069-2023), 2023-12-19
Supplement: Supplementary file 1 [file bg-20-5069-2023-supplement.zip]

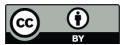

## *Supplement of*

# **Charcoal morphologies and morphometrics of a Eurasian grass-dominated system for robust interpretation of past fuel and fire type**

**Angelica Feurdean et al.**

*Correspondence to:* Angelica Feurdean ([feurdean@em.uni-frankfurt.de](mailto:feurdean@em.uni-frankfurt.de))

- [bg-20-5069-2023-supplement-title-page.pdf](#)
- [Supplement\\_File\\_S1.xlsx](#)
- [Supplement\\_File\\_S2.docx](#)

The copyright of individual parts of the supplement might differ from the article licence.
