# Supplementary material for: Charcoal morphologies and morphometrics of a Eurasian grass-dominated system for robust interpretation of past fuel and fire type
Source: Copernicus journal article supplement (doi:10.5194/bg-20-5069-2023), 2023-12-19
Supplement: Supplementary file 1 [file Supplement_File_S1.xlsx]

## Sheet: 250 degrees C
Area	Perimetre	Length	Width	Area/Perimetre	Length/Width	Width/Length	Area	Perimetre	Length	Width	Area/Perimetre	Length/Width	Width/Length	Area	Perimetre	Length	Width	Area/Perimetre	Length/Width	Width/Length	Area	Perimetre	Length	Width	Area/Perimetre	Length/Width	Width/Length	Area	Perimetre	Length	Width	Area/Perimetre	Length/Width	Width/Length	Area	Perimetre	Length	Width	Area/Perimetre	Length/Width	Width/Length	Area	Perimetre	Length	Width	Area/Perimetre	Length/Width	Width/Length	Area
Forbs							Forbs							Forbs							Forbs							Forbs							Forbs							Forbs							Forbs
Euphorbia glareosa	Euphorbia glareosa	Euphorbia glareosa	Euphorbia glareosa	Euphorbia glareosa	Euphorbia glareosa	Euphorbia glareosa	Achillea sp.	Achillea sp.	Achillea sp.	Achillea sp.	Achillea sp.	Achillea sp.	Achillea sp.	Cannabis ruderalis	Cannabis ruderalis	Cannabis ruderalis	Cannabis ruderalis	Cannabis ruderalis	Cannabis ruderalis	Cannabis ruderalis	Galium sp.	Galium sp.	Galium sp.	Galium sp.	Galium sp.	Galium sp.	Galium sp.	Chenopodium	Chenopodium	Chenopodium	Chenopodium	Chenopodium	Chenopodium	Chenopodium	Leonurus sp.	Leonurus sp.	Leonurus sp.	Leonurus sp.	Leonurus sp.	Leonurus sp.	Leonurus sp.	Artemisia campestris	Artemisia campestris	Artemisia campestris	Artemisia campestris	Artemisia campestris	Artemisia campestris	Artemisia campestris	Eryngium campestre
265071	2886.6	868.5	426.9	91.8281	2.03443	0.491537	56635.8	1152.9	377	209.3	49.1246	1.80124	0.555172	9474.8	799.8	173.5	130.6	11.8465	1.32848	0.752738	135947	1947.5	551.2	362.1	69.806	1.52223	0.65693	116075	2493.8	777.5	213.9	46.5454	3.63488	0.275113	775518	4696	1279.1	790.8	165.144	1.61748	0.618247	342816	4440.7	1664.7	283.2	77.1986	5.87818	0.170121	176482
29134.1	828.5	307.8	126.3	35.1649	2.43705	0.410331	61989.1	1865.9	539.6	174.5	33.2221	3.09226	0.323388	459748	6996.5	2227.9	466.2	65.7111	4.77885	0.209255	251424	2756.8	840.9	408.8	91.2014	2.057	0.486146	181116	3542.7	1485.9	174.4	51.1237	8.52007	0.11737	8972.9	580.7	181.4	72.5	15.4519	2.50207	0.399669	12293.4	956.8	411.2	40.9	12.8485	10.0538	0.099465	367266
211994	3895.1	1453.5	235.3	54.4258	6.17722	0.161885	26913.7	724.2	211.1	166.6	37.1634	1.26711	0.789199	265614	3651.9	912.2	404.3	72.733	2.25625	0.443214	35577.3	1100.8	290	184	32.3195	1.57609	0.634483	480908	5568.8	1826.4	382.8	86.3575	4.77116	0.209593	45878.5	1308.4	360.3	190.1	35.0646	1.89532	0.527616	36038.7	1544	298.3	231	23.3411	1.29134	0.774388	47373.9
958165	13019.6	4385.5	766.9	73.5941	5.71848	0.174872	284269	3318.4	1242	301.4	85.6645	4.12077	0.242673	48641.3	1099.7	303.2	234.2	44.2314	1.29462	0.772427	14265.4	599.9	207.3	92.9	23.7796	2.23143	0.448143	57345.5	1183.3	340	229.3	48.4624	1.48277	0.674412	1.73712e+06	20674.5	3613.3	1044.7	84.0221	3.4587	0.289126	401236	6484.9	1690.2	622.9	61.8724	2.71344	0.368536	518143
68113	1299.3	509.2	176.6	52.4228	2.88335	0.346819	39278	978.1	329.2	159.4	40.1574	2.06524	0.484204	13205.9	594.2	211	86.2	22.2247	2.4478	0.408531	21839.2	1099.8	460.3	63.7	19.8574	7.22606	0.138388	846562	11979.5	1841.1	854.3	70.6675	2.1551	0.464016	483792	5107.2	1220.5	608.6	94.7275	2.00542	0.498648	2.39725e+06	42444.9	3515.8	3083.9	56.4792	1.14005	0.877155	36631.8
9272	530.6	176.1	79.5	17.4746	2.21509	0.451448	752047	10060.1	1662	1102.6	74.7554	1.50735	0.663418	212212	2911.2	696.9	447.2	72.895	1.55836	0.641699	175530	2670.4	765.7	310.1	65.7315	2.4692	0.404989	51769.1	1172	485.8	139.4	44.1716	3.48494	0.286949	186834	2893.5	846	303.3	64.5703	2.78932	0.358511	713326	6177.2	2264	422	115.477	5.36493	0.186396	1.97085e+06
9190.9	510.7	152.9	90.8	17.9967	1.68392	0.593852	153974	3229	1444.2	145	47.6848	9.96	0.100402	29813.4	951.6	361.4	110	31.3298	3.28545	0.304372	23912.6	903.9	374.4	99.2	26.4549	3.77419	0.264957	40895.2	934.4	280.2	196.5	43.7663	1.42595	0.701285	32109.9	1074.5	297.9	161.8	29.8836	1.84116	0.543135	13900.4	2043.4	859.4	43.1	6.80258	19.9397	0.0501513	18569.4
212182	3285.7	1223.8	237.1	64.5773	5.16154	0.193741	43825.3	915.7	241.4	237.7	47.8599	1.01557	0.984673	34588.8	941	296.6	161.7	36.7575	1.83426	0.545179	8415.3	628.1	207.4	68.6	13.398	3.02332	0.330762	184685	2315.6	772.7	328.7	79.7568	2.35078	0.425391	81405.1	2155.7	501.9	262.7	37.7627	1.91054	0.523411	964710	12882.7	2578.1	723.2	74.8841	3.56485	0.280517	9758.7
334528	6090.2	1594.7	489.1	54.9288	3.26048	0.306703	27369.9	938.3	382.2	99.2	29.1697	3.85282	0.25955	83732	1637.9	518.8	217.5	51.1216	2.38529	0.419237	145189	1981.7	547.6	374.5	73.2648	1.46222	0.683893	631678	12747.9	4549.9	219	49.5515	20.7758	0.0481329	9114.9	665.3	183.6	87.6	13.7004	2.09589	0.477124	14747	1892	447.8	276.9	7.7944	1.61719	0.618356	182840
283904	3756	776.6	559.6	75.5868	1.38778	0.720577	167940	1895.9	561.5	394.1	88.5809	1.42477	0.70187	196142	2839.5	817.3	387.8	69.0762	2.10753	0.474489	10808.1	470.7	156.4	92.8	22.9618	1.68534	0.59335	327917	2735.1	1016.9	431.1	119.892	2.35885	0.423935	57964	1444.8	427.3	187.4	40.119	2.28015	0.438568	11593.8	1129.3	554.7	32.3	10.2664	17.1734	0.0582297	9631.9
9728.3	765.7	325.2	41.5	12.7051	7.83614	0.127614	182368	1891.4	539.4	450	96.4196	1.19867	0.83426	10914.5	696	183.2	98.7	15.6818	1.85613	0.538755	18635.3	569.8	179.3	135.7	32.705	1.3213	0.756832	1.0957e+06	15423.8	3354.1	921.3	71.0395	3.64062	0.274679	9905.7	649.6	212.2	74	15.2489	2.86757	0.348728	61614	1174.5	377.1	227.8	52.4598	1.6554	0.604084	19030.7
20500.8	876.2	267.4	121.5	23.3974	2.20082	0.454375	176726	2846.3	1043.7	245.6	62.0897	4.24959	0.235317	27410.5	830	230.2	161.9	33.0247	1.42187	0.703301	13211	603.4	181.4	102	21.8943	1.77843	0.562293	322645	5759.3	1809.3	270.4	56.0215	6.6912	0.14945	326705	4334.6	1309.5	354.8	75.3715	3.69081	0.270943	636332	6987.4	1598.2	594.1	91.0685	2.69012	0.371731	12739.5
16232.4	741.6	240.9	97.5	21.8883	2.47077	0.404732	48149.6	1551.2	570.1	122.8	31.0402	4.64251	0.215401	64721.6	2058	503.4	206.4	31.4488	2.43895	0.410012	642714	4504	1199.9	734.8	142.699	1.63296	0.612384	9180.8	501.2	161.2	81.9	18.3176	1.96825	0.508065	70769.4	2048.8	546.6	198.3	34.5419	2.75643	0.362788	1.00631e+06	10145.8	2667	523.9	99.1849	5.09067	0.196438	13657.1
231739	4389.1	1800.2	196.1	52.7988	9.18001	0.108932	59165.5	1168.1	381.5	205.1	50.6511	1.86007	0.537615	160737	2085.3	560.7	427.5	77.0809	1.31158	0.76244	336064	2936.6	812	531.7	114.44	1.52718	0.654803	26127.9	955.4	199.4	186.9	27.3476	1.06688	0.937312	216531	6066.2	899	470.4	35.6947	1.91114	0.523248	86946	1819.2	560.1	207.4	47.7935	2.70058	0.370291	1.5759e+06
32850	1311.6	345	153.1	25.0457	2.25343	0.443768	25747.7	875.7	307.7	116	29.4024	2.65259	0.376991	55850.1	1463.1	329.9	254.3	38.1724	1.29729	0.77084	1.09367e+06	7428.7	1749.1	878.8	147.222	1.99033	0.50243	254958	4483.4	1423.4	393.5	56.867	3.61728	0.276451	390976	3418.3	800.1	661	114.377	1.21044	0.826147	772218	7615	2179.3	492.6	101.407	4.42408	0.226036	20647.8
389115	6661.3	1586.1	507.3	58.4143	3.12655	0.319841	16663.3	768.4	337.5	83.4	21.6857	4.04676	0.247111	11548.2	477	168.7	88.7	24.2101	1.90192	0.525785	741335	8645.6	1607.4	863.5	85.7471	1.86149	0.537203	50674.1	1051.7	384.2	175.8	48.183	2.18544	0.457574	13565.8	680.2	279.3	66.6	19.9438	4.19369	0.238453	11958.8	1210.7	326.9	128.9	9.87759	2.53607	0.39431	8937.4
10285.9	739.2	175.4	106.3	13.9149	1.65005	0.606043	249721	2743.7	1045.2	312.1	91.0161	3.34893	0.298603	672436	5784.9	1824.1	531.9	116.24	3.4294	0.291596	326599	4175.3	1721.4	258.2	78.2216	6.66692	0.149994	12364.4	870.9	407.8	41.6	14.1973	9.80288	0.102011	14899.1	765.9	227.4	100.6	19.4531	2.26044	0.442392	13875.1	2042	726.7	109.8	6.79486	6.6184	0.151094	9287.2
103143	2164.8	689.1	243.6	47.6455	2.82882	0.353505	56073.1	1428.9	395.2	201.6	39.2421	1.96032	0.510121	17317.2	781.4	234.8	132.7	22.1618	1.7694	0.565162	73157.1	1401.9	414.2	257.5	52.1842	1.60854	0.62168	363859	3189.9	871.3	554.7	114.066	1.57076	0.636635	332150	3906.2	971.9	457.2	85.0315	2.12577	0.470419	1.82493e+06	14910	5269.1	614.8	122.397	8.57043	0.11668	7.07936e+06
405363	6629.9	2035.6	442.1	61.1416	4.60439	0.217184	257842	3351.7	1223.2	279.9	76.9287	4.37013	0.228826	115132	1968.3	634.6	279.6	58.4932	2.26967	0.440592	10711.7	526.1	152	96.3	20.3606	1.5784	0.633553	27238.1	769.7	232.2	161.3	35.3879	1.43955	0.69466	1021224	9270.5	2274.8	742.5	110.158	3.0637	0.326402	24008.9	3040.4	1422.7	96.9	7.89663	14.6821	0.0681099	2.5632e+06
36951.2	1220.9	392.8	136	30.2655	2.88824	0.346232	96040.6	3226.2	1136.1	231.5	29.769	4.90756	0.203767	383716	3555.5	761.3	682.7	107.922	1.11513	0.896756	129504	1639.8	516	331.6	78.9755	1.55609	0.642636	17134.7	955.4	278.3	106.5	17.9346	2.61315	0.382681	13930.8	584.5	188.8	101.9	23.8337	1.8528	0.539725	56554.7	2449.7	517.3	247.5	23.0864	2.0901	0.478446	7801.9
410640	8136.6	1333.9	634.7	50.4683	2.10162	0.475823	169933	3048.8	1426.9	158	55.7376	9.03101	0.11073	75514.4	1370.9	423.7	248.4	55.0838	1.70572	0.586264	299335	3662.2	830.6	514.5	81.7365	1.61438	0.619432	302311	2999.5	809.4	493.7	100.787	1.63946	0.609958	31638.4	796.8	292.5	140.6	39.7068	2.08037	0.480684	256970	3134.8	1246	275.4	81.9734	4.52433	0.221027	13246.5
56113.7	1354.6	437	196	41.4246	2.22959	0.448513	79732.2	2805.3	563.8	371.5	28.422	1.51763	0.658922	472989	5508.1	1922.8	355.7	85.8716	5.40568	0.184991	103057	2558.9	598	398.4	40.2738	1.501	0.666221	9226.4	778.6	287.3	78.7	11.85	3.65057	0.27393	267601	4397.8	912.8	432.5	60.8488	2.11052	0.473817	17276.7	587.3	185.9	129.9	29.4172	1.4311	0.698763	10554.6
583219	8287.3	2423.8	418.7	70.375	5.78887	0.172745	37382.1	975.8	250.6	202.2	38.3092	1.23937	0.806864	11203.5	509.5	151.7	107.2	21.9892	1.41511	0.706658	117302	1975.3	741.6	222.2	59.3843	3.33753	0.299622	94149.7	2095.8	841.4	147.1	44.923	5.71992	0.174828	675549	7821.8	1500.9	696	86.3674	2.15647	0.463722	752163	7035.3	2689.6	370.4	106.913	7.26134	0.137716	53442.1
37833.3	1326.7	457	147.2	28.5168	3.10462	0.322101	26781.9	908.2	379.5	96.4	29.489	3.93672	0.254018	26513.2	785.6	229.5	161.6	33.749	1.42017	0.704139	231212	3389.5	778.8	431.4	68.2142	1.80529	0.553929	62906.7	1217.1	353.7	232.9	51.6857	1.51868	0.658468	14706.5	834.4	207.4	111.9	17.6252	1.85344	0.539537	740326	8573.4	1898.5	759.9	86.3515	2.49836	0.400263	26254.6
21428.5	659.4	177.1	162.7	32.497	1.08851	0.91869	158096	1785.3	517.8	410.8	88.5541	1.26047	0.793357	78074.5	1543.3	399.7	268.4	50.5893	1.4892	0.671504	1565160	10962.6	3248.1	698	142.773	4.65344	0.214895	1.17356e+06	13343.7	3878.3	525.4	87.9487	7.38161	0.135472	291680	3104.2	959.4	400.5	93.9632	2.39551	0.417448	957866	9044.9	2862.8	532.9	105.901	5.37211	0.186146	10083.1
54359.6	1482.6	578.5	129.2	36.665	4.47755	0.223336	156869	2818	995.9	226.7	55.6667	4.39303	0.227633	78682.8	1545.4	505.1	220.5	50.9142	2.2907	0.436547	12780.1	865.8	238.9	109.9	14.761	2.17379	0.460025	68630.1	1885.6	781.4	136.3	36.397	5.73294	0.174431	27238.1	1592.3	294.2	182.2	17.1061	1.61471	0.619307	16931.9	1965.4	606.4	122.1	8.61499	4.96642	0.201352	1.19832e+06
431065	7746.7	2241.4	317	55.645	7.07066	0.141429	45797.3	1002.5	348.8	174.5	45.6831	1.99885	0.500287	15461.8	965.9	401.3	61.6	16.0077	6.51461	0.153501	551647	6560.6	1878.5	452.5	84.0848	4.15138	0.240884	19755.6	726.4	318.1	82.8	27.1966	3.84179	0.260296	654014	7096.5	1839	727.7	92.1601	2.52714	0.395704	3.08025e+06	22471	4963.2	2220.7	137.077	2.23497	0.447433	7730.9
1.70012e+06	13636.3	3234.4	838.7	124.676	3.85644	0.259306	40449.1	1488.5	545.5	115.4	27.1744	4.72704	0.211549	143810	2291.8	633.6	333.9	62.7498	1.89757	0.526989	40474.4	1251.9	321.6	186.6	32.3304	1.72347	0.580224	12384.6	573.7	203.7	89.8	21.5872	2.26837	0.440844	19314.6	838.5	302.3	93.9	23.0347	3.21938	0.310619	27968.1	824.4	225	166.9	33.9254	1.34811	0.741778	16572
551332	4158.6	1032.1	710.1	132.576	1.45346	0.688015	29767.8	1394.3	477.4	109.7	21.3496	4.35187	0.229786	1.71716e+06	9786.7	2922.2	844.4	175.459	3.46068	0.28896	11776.3	1404.6	338.6	148.3	8.3841	2.28321	0.43798	13008.2	639.5	239.7	74.9	20.3412	3.20027	0.312474	433376	3243	916	615.8	133.634	1.4875	0.672271	16683.5	616.7	203	109	27.0529	1.86239	0.536946	9713.1
23618.5	1134	435.7	83.1	20.8276	5.24308	0.190728	30705.6	975	372.5	119.1	31.4929	3.12762	0.319732	34381	1081.2	287.5	172.5	31.7989	1.66667	0.6	67692.3	1413.6	463.8	196.7	47.8865	2.35791	0.424105	46856.9	1299.4	543.6	124.5	36.0604	4.36627	0.229029	50932.7	1220.7	401	179.1	41.7242	2.23897	0.446633	185111	2747.8	930.5	304.6	67.3669	3.05483	0.327351	22878.4
99092.4	2288.6	719.8	246	43.2983	2.92602	0.341762	70095.2	2218.1	884.7	196.9	31.6015	4.49314	0.222561	33833.5	816.9	240.5	185.3	41.4169	1.2979	0.770478	202245	2854.7	804.6	340.1	70.8465	2.36577	0.422695	185379	2818.7	753.1	400.6	65.7677	1.87993	0.531935	1.06581e+06	7182.5	1779.8	851.5	148.39	2.09019	0.478425	1.21345e+06	13226	4308.1	505.4	91.7471	8.52414	0.117314	942998
56585.1	1390.3	451.6	174.6	40.6999	2.58648	0.386625	20419.7	870.2	325.3	91.3	23.4655	3.56298	0.280664	18817.8	593.7	176.3	138.4	31.6958	1.27384	0.785026	8790.4	435.8	150.4	83.5	20.1707	1.8012	0.555186	696075	5980.5	2098.9	473.9	116.391	4.42899	0.225785	193196	4755.6	1849.2	415.5	40.6251	4.45054	0.224692	303710	3920	923	446.8	77.4771	2.0658	0.484074	25413.1
20272.7	1094	297.7	176	18.5308	1.69148	0.591199	25063.3	871.1	367.1	91.6	28.772	4.00764	0.249523	100720	2157.9	666.6	233.5	46.6749	2.85482	0.350285	197227	2481.8	789.4	329.7	79.4692	2.3943	0.417659	10671.2	607.8	254.9	57.7	17.5571	4.41768	0.226363	597718	7685.8	1884	562.7	77.7691	3.34814	0.298673	43054.8	1020.1	292.5	195.7	42.2065	1.49463	0.66906	29103.7
540266	5052.1	1409.9	589	106.939	2.39372	0.41776	69035.7	1439.6	542.3	169.8	47.9548	3.19376	0.313111	166176	2205.8	554.6	444.5	75.3361	1.24769	0.801479	18985.1	650.3	247.6	100.7	29.1944	2.45879	0.406704	499442	6291.4	2269.4	311.3	79.3848	7.29007	0.137173	11289.6	811.4	207.2	100.3	13.9137	2.0658	0.484073	13094.4	827.2	296.5	65.2	15.8298	4.54755	0.219899	196340
101551	3098.3	531.3	437.4	32.7764	1.21468	0.823264	73562.7	2363.4	499.6	266.6	31.1258	1.87397	0.533627	14260.3	691.8	191.2	112.9	20.6133	1.69353	0.590481	2.20958e+06	14602.3	4366.1	766.3	151.317	5.69764	0.175511	261943	3850.1	1091	507.9	68.0354	2.14806	0.465536	95832.7	2175.5	508.5	284	44.0509	1.79049	0.558505	52808.4	2996.7	668	271.5	17.6222	2.46041	0.406437	12263
95204.1	2005.2	409.9	331.9	47.4786	1.23501	0.80971	111553	2279.2	670.8	287.6	48.944	2.33241	0.428742	35080.5	897.8	247.1	194	39.0738	1.27371	0.785107	15086.7	1121	340.3	193.4	13.4583	1.75957	0.568322	22939.2	1165.4	449.1	91.2	19.6835	4.92434	0.203073	29418	906	268.4	150.4	32.4702	1.78457	0.560358	8151.7	1143.2	515	85.8	7.1306	6.00233	0.166602	1.48615e+06
72508.2	1450.7	445.7	223.1	49.9815	1.99776	0.500561	157305	2798.3	1016.5	229.1	56.2144	4.43693	0.225381	11806.7	483.2	173.6	91.5	24.4344	1.89727	0.527074	374525	5477.8	1745.3	346.3	68.3715	5.03985	0.198419	454258	6736.1	1528.4	679.6	67.4363	2.24897	0.444648	543079	8168.1	2286.2	579.7	66.4878	3.94376	0.253565	469050	4019.6	946.2	644.8	116.691	1.46743	0.681463	60894.1
478611	5979.9	1044.7	749.5	80.0367	1.39386	0.717431	49092.5	1261.4	419.5	195.1	38.9191	2.15018	0.465077	12313.7	632.6	253.9	70.2	19.4652	3.61681	0.276487	32444.4	1052.5	274.4	180	30.826	1.52444	0.655977	1.38526e+06	19424.6	5271.9	1617.7	71.3148	3.25889	0.306853	2.30506e+06	16513.2	3368.9	958.2	139.589	3.51586	0.284425	332059	3459.7	810	571.3	95.979	1.41782	0.705309	25418.2
448397	7176.4	1660.6	428.6	62.4822	3.87448	0.258099	144580	3386.2	1207.4	188.2	42.697	6.41552	0.155872	12633.1	610	182	102.8	20.71	1.77043	0.564835	630836	5693.4	1536.8	616.5	110.801	2.49278	0.401158	15847.1	576.1	158	148	27.5076	1.06757	0.936709	1.14581e+06	7660.6	2220.8	729.6	149.571	3.04386	0.32853	238604	2330.4	873.6	366.1	102.387	2.38623	0.419071	78682.8
63824.3	1655.6	421.2	236.3	38.5506	1.78248	0.561016	144423	1768.3	521.5	364.9	81.6736	1.42916	0.699712	16232.4	610.9	217.8	102.7	26.5713	2.12074	0.471534	13864.9	764.6	280.3	93.1	18.1335	3.01074	0.332144	212050	2866.1	1194.3	235.5	73.9855	5.07134	0.197187	8678.9	768.1	213	80.2	11.2992	2.65586	0.376526	104263	1836.3	673.7	236.2	56.779	2.85224	0.350601	47095.1
39435.2	945.6	254.3	214.1	41.7039	1.18776	0.841919	48387.8	1525.3	566.2	124.5	31.7235	4.54779	0.219887	89754.5	1674.9	460.2	273.4	53.588	1.68325	0.59409	26381.4	851.9	240.2	155.8	30.9677	1.54172	0.648626	199290	3609.7	1385.8	326	55.2095	4.25092	0.235243	1.34569e+06	7980.7	1887.5	1085.9	168.618	1.73819	0.575311	23780.8	1449	419.2	162	16.4119	2.58765	0.38645	1.98296e+06
28323	873.7	237.9	160.8	32.4173	1.47948	0.675914	10686.4	688.8	163	98.5	15.5145	1.65482	0.604294	83220	1716.5	584.7	199.1	48.4824	2.93672	0.340517	10544.4	620.9	222.8	72.7	16.9824	3.06465	0.326302	2.6958e+06	25293.6	4791.9	2178.5	106.58	2.19963	0.454621	22391.7	1363.6	573.2	72.7	16.421	7.88446	0.126832	8891.8	915	404.8	46.8	9.71781	8.64957	0.115613	60985.4
10387.3	490	161.5	90.6	21.1986	1.78256	0.560991	143207	2230.8	753.8	265.9	64.1952	2.8349	0.352746	351054	4284.3	1228.2	404.1	81.9396	3.03935	0.329018	38112.1	1027	377.7	146.9	37.1101	2.57114	0.388933	15477	639.1	224.2	107.6	24.2169	2.08364	0.479929	51008.7	1751.5	307.2	257.1	29.1229	1.19487	0.836914	1038891	14381.7	2987.4	1275.6	72.237	2.34196	0.426993	355738
925711	13006	3199.3	688.8	71.1757	4.64474	0.215297	32855.1	977.6	367.4	126.2	33.6079	2.91125	0.343495	2.18598e+06	11850.2	1956.4	1596.7	184.468	1.22528	0.816142	8896.9	575.8	204.7	77.1	15.4514	2.65499	0.376649	16252.6	713.1	225.1	110.4	22.7915	2.03895	0.490449	2.31434e+06	15900	2755.1	1410.2	145.556	1.95369	0.511851	8795.5	524.6	157.4	78.5	16.7661	2.0051	0.498729	90322.3
15030.9	770.5	304.4	75.2	19.508	4.04787	0.247043	150081	1891.7	553.1	400.9	79.3365	1.37965	0.724824	9474.8	535.7	194.7	74.7	17.6868	2.60643	0.383667	900820	6243.3	1971.6	625.8	144.286	3.15053	0.317407	32490.1	922.2	327.1	130.8	35.2311	2.50076	0.399878	29367.3	1052	350	133.4	27.9157	2.62369	0.381143	256032	3214.4	1208.7	319.5	79.6516	3.7831	0.264334	2.87581e+06
11908.1	586.6	239.8	72.6	20.3002	3.30303	0.302752	335080	3003.8	1136.9	393.4	111.552	2.88993	0.346029	36074.2	1443.9	463.4	117.7	24.9839	3.93713	0.253992	79483.8	1310.5	411.2	261.6	60.6515	1.57187	0.636187	44641.5	1549.1	362.8	234.3	28.8177	1.54844	0.64581	1.9175e+06	10890.7	2382.1	1219.6	176.068	1.95318	0.511985	22913.9	2270.6	832.2	86.6	10.0916	9.6097	0.104062	24744
13824.4	541.4	171.6	106.2	25.5345	1.61582	0.618881	573460	6104.8	1244.5	947	93.936	1.31415	0.760948	1356593	9642.2	2537.2	781	140.693	3.24866	0.30782	15309.7	692.5	252	83.8	22.1079	3.00716	0.33254	8192.2	522.5	229.2	53.8	15.6789	4.26022	0.234729	773100	9342.8	3388.8	383.6	82.7482	8.8342	0.113196	288147	3090.4	790.6	496.6	93.2394	1.59203	0.628131	645923
357426	4905.9	944.9	701	72.8564	1.34793	0.741877	38360.5	1024.7	396.6	125.7	37.4358	3.15513	0.316944	14965	617.8	248.9	79.8	24.223	3.11905	0.320611	126513	1876.5	687.9	239.8	67.4197	2.86864	0.348597	658870	7738.8	2108.9	572.6	85.1386	3.68302	0.271516	38076.6	1424.4	294.1	206.9	26.7317	1.42146	0.703502	617306	9617.3	2068.1	662.2	64.187	3.12307	0.320197	17504.8
11832.1	755.1	181.3	124.9	15.6696	1.45156	0.688913	144662	1980.8	582.7	339.8	73.0319	1.71483	0.583147	15375.6	662.6	184.1	126.9	23.205	1.45075	0.689299	138933	2700.6	821.1	250.3	51.4453	3.28046	0.304835	29139.2	962.2	332.4	133.7	30.2839	2.48616	0.402226	61862.4	2745.3	503.4	235.1	22.5339	2.14122	0.467024	1.01142e+06	15192.6	3592.7	1073.4	66.5735	3.34703	0.298773	10620.5
56630.7	2124.4	368.4	285.7	26.6573	1.28946	0.775516	388953	8300.6	2232.5	544.5	46.8584	4.10009	0.243897	117048	1889.3	653.2	267.4	61.9533	2.44278	0.409369	47379	1002.3	271.5	235	47.2703	1.15532	0.865562	262668	3370.3	1265.2	310.2	77.9361	4.07866	0.245179	2.44912e+06	16027.8	2106.5	1548.3	152.805	1.36052	0.735011	2.4601e+06	26596.8	5656.8	1798.5	92.4963	3.14529	0.317936	10002
13839.6	550.4	168.1	112.9	25.1446	1.48893	0.671624	17636.6	897.3	310.2	85.2	19.6552	3.64085	0.274662	74596.9	2014.7	714.1	151.1	37.0263	4.72601	0.211595	110098	1683.2	547.4	273.6	65.4101	2.00073	0.499817	2.0945e+06	15875.8	3545.9	2087.8	131.93	1.69839	0.588793	663402	8239.2	2046.7	562.9	80.5178	3.63599	0.275028	1.30929e+06	10099.2	3789.5	472.1	129.643	8.0269	0.124581	162100
88629.1	1658.3	376.8	328.2	53.4458	1.14808	0.871019	23796	755.9	233.4	137.5	31.4804	1.69745	0.589117	46816.3	1164.7	371.1	166.4	40.196	2.23017	0.448397	35699	882.1	321.2	150.6	40.4705	2.1328	0.468867	8095.9	863.1	219.8	73.6	9.38003	2.98641	0.33485	22893.6	928.1	296.5	160.2	24.6672	1.85081	0.540304	255870	3862.8	1128.9	340.5	66.2395	3.31542	0.301621	8308.8
329934	3502.6	984.4	462.9	94.197	2.12659	0.470236	23993.7	903.8	244.6	148.7	26.5476	1.64492	0.607931	241458	3273.8	998.7	373.4	73.7545	2.67461	0.373886	105662	1648.6	425.4	339.9	64.0922	1.25154	0.799013	46126.9	1488.3	487.1	152.4	30.993	3.19619	0.312872	35334	908.4	297.5	170.2	38.897	1.74794	0.572101	1.6928e+06	16667.7	3342.5	1478.5	101.562	2.26074	0.442334	533518
150507	1821.7	473.2	431.2	82.6188	1.0974	0.911243	128226	2692.6	822.2	213	47.6218	3.86009	0.259061	44327.2	1291.4	333.4	186.3	34.3249	1.78959	0.558788	343916	5173.4	845.1	677.7	66.4778	1.24701	0.801917	875564	9728.6	2754.3	603	89.9989	4.56766	0.21893	575742	8432.6	1768.1	623.5	68.2757	2.83577	0.352638	29585.3	965.6	423.7	95.8	30.6393	4.42276	0.226103	584446
224222	3210.8	1193.1	260.4	69.8335	4.5818	0.218255	23902.4	691.8	225	139.4	34.551	1.61406	0.619556	799147	6946.4	1250.6	957.6	115.045	1.30597	0.765712	374409	4325.4	1524.9	334.2	86.5605	4.56284	0.219162	193232	3196.2	1190.2	227	60.4568	5.24317	0.190724	307325	3861.4	1034.8	402.9	79.589	2.56838	0.389351	12612.8	687.1	204.5	93.2	18.3566	2.19421	0.455746	1.7438e+06
17661.9	1057.1	365.7	80.7	16.7079	4.5316	0.220673	63342.7	1266.3	346.3	242.6	50.0219	1.42745	0.700549	8384.9	606.7	193.9	77.1	13.8205	2.51492	0.397628	72406.9	1612.5	538.4	203.3	44.9035	2.6483	0.3776	56392.5	2670.1	1315.4	72.3	21.12	18.1936	0.0549643	17073.9	726.1	258.9	95.3	23.5145	2.71668	0.368096	910112	14551.1	2241.9	954.4	62.5459	2.34902	0.42571	770692
282824	3872.6	1172.6	334.7	73.0321	3.50344	0.285434	55667.6	1149.1	382.1	203.6	48.4445	1.87672	0.532845	1.20446e+06	8146	1679	970.6	147.86	1.72986	0.578082	65243.7	1365.1	509.1	178.4	47.7941	2.8537	0.350422	16019.4	684.7	263.5	80.5	23.3962	3.27329	0.305503	11162.9	771.6	254.4	93.1	14.4672	2.73255	0.365959	111244	1730.7	591.6	265.2	64.2768	2.23077	0.448276	15117.1
52909.8	1731.9	616.2	172	30.5501	3.58256	0.27913	68792.3	1460.1	492.7	187.1	47.1148	2.63335	0.379744	47221.9	1127.8	398.7	168.5	41.8708	2.36617	0.422624	280786	4684.6	1163	484.2	59.9382	2.4019	0.416337	574829	5983.7	2324.2	346	96.0658	6.71734	0.148868	532809	10586	2185.4	404.5	50.3314	5.40272	0.185092	36515.2	927.8	353.2	135	39.3568	2.6163	0.38222	31902
37620.3	2000.4	584.6	140	18.8064	4.17571	0.23948	127522	2140.3	649.8	275.8	59.5813	2.35606	0.424438	8065.5	603.2	180.4	76.7	13.3712	2.35202	0.425166	190058	2255.5	790.7	316.4	84.2645	2.49905	0.400152	8699.2	494.6	185.1	66.9	17.5884	2.76682	0.361426	48316.9	2754.6	602.8	201.1	17.5404	2.99751	0.33361	218696	2690	1076.6	272.1	81.2996	3.95663	0.25274	23116.7
104978	1764.5	624.5	239	59.4945	2.61297	0.382706	61791.4	1243.2	467.9	177	49.7035	2.6435	0.378286	56042.7	1599.5	385.4	220.2	35.0376	1.75023	0.571354	127040	1707.6	657	250.5	74.3969	2.62275	0.381279	488329	4840.2	1834.7	368.7	100.89	4.97613	0.200959	221991	3530.1	852.7	360	62.8852	2.36861	0.422188	329230	5664.6	1433.7	344.1	58.1206	4.16652	0.240008	657608
12425.2	723.7	296.1	64.4	17.169	4.59783	0.217494	30614.4	1657.5	734.2	63.1	18.4702	11.6355	0.0859439	22006.5	664.4	223.9	130.8	33.1224	1.71177	0.584189	23339.7	697.1	206.9	153	33.4811	1.35229	0.739488	354293	4318.5	1417.6	536.7	82.0408	2.64133	0.378598	807836	7019.7	1654	844.1	115.081	1.95948	0.510339	1.19633e+06	14850.5	2343.3	1431.7	80.5581	1.63673	0.610976	8628.2
283138	4096.2	1400.6	305.6	69.1222	4.58312	0.218192	264666	4064.6	1461.6	277.4	65.1148	5.26893	0.189792	946531	12840.8	1928.4	966.6	73.7128	1.99503	0.501245	180386	3799.6	1132.4	295.6	47.475	3.83085	0.261039	622842	7403.3	2395.3	463.3	84.1303	5.17008	0.19342	279960	3990.3	977.1	385.1	70.1601	2.53726	0.394125	658287	7180.6	2323.4	440.1	91.6758	5.27925	0.189421	48981
12369.4	497.9	156.6	104.1	24.8431	1.50432	0.664751	307538	4600.4	1350.7	422.7	66.8502	3.19541	0.312949	45913.9	1010.5	283	231	45.4368	1.22511	0.816254	15857.2	679.4	152.3	141.8	23.34	1.07405	0.931057	40043.5	1117.7	289.5	199.1	35.8267	1.45404	0.687737	93369	1703.8	537.9	246.8	54.8004	2.1795	0.458821	11213.6	1668.6	864.3	49.3	6.72036	17.5314	0.0570404	57092.1
153082	2114.4	662.7	310.9	72.3997	2.13155	0.469141	78834.9	1318.7	414.2	259.3	59.7823	1.59738	0.626026	988607	7081.4	1677.1	979.9	139.606	1.7115	0.584282	72381.5	2783	969.7	169.9	26.0084	5.70747	0.175209	1.39706e+06	12612.1	2407.2	1635.8	110.772	1.47157	0.679545	46436.1	1432.5	432.6	146.5	32.4161	2.9529	0.33865	2.09652e+06	27152	5069.3	1806.5	77.2143	2.80614	0.356361	418969
731343	11491.4	2618.9	810.7	63.6427	3.23042	0.309557	228642	3242.1	763.8	665.4	70.5228	1.14788	0.87117	83498.8	1819.9	519.2	218.7	45.881	2.37403	0.421225	57198.5	1705.6	406	251.4	33.5357	1.61496	0.619212	81678.9	1268.6	382.5	279.2	64.3851	1.36999	0.729935	87442.8	1665.3	427.6	270.9	52.5087	1.57844	0.633536	536783	5963	2004.4	363.4	90.019	5.51569	0.181301	56311.4
622284	6916.9	1905.8	528.7	89.9658	3.60469	0.277416	823060	7628.2	2904.2	411.2	107.897	7.06274	0.141588	378809	5447.6	1316.2	475.5	69.5369	2.76803	0.361267	539982	6299	1475.2	662.6	85.725	2.22638	0.449159	12481	608.6	196.8	96.5	20.5077	2.03938	0.490346	583341	5988.5	1223.2	661.8	97.4102	1.84829	0.54104	19284.2	647	177.5	147	29.8056	1.20748	0.828169	155434
20870.9	664.6	229	119	31.4037	1.92437	0.519651	63053.7	1571.3	453.7	201.8	40.1284	2.24827	0.444787	64828	1403.8	503.7	178.8	46.1804	2.81711	0.354973	297140	3759.9	1014	408.5	79.0288	2.48225	0.40286	16896.5	624.2	201.3	110.3	27.069	1.82502	0.547938	296035	3997.5	723.2	561.4	74.0551	1.28821	0.776272	36636.9	888	274.5	175.5	41.2578	1.5641	0.639344	2922772
25220.5	777.4	261.4	130.8	32.4421	1.99847	0.500383	325306	3788	1145.2	397.3	85.8781	2.88246	0.346926	219355	3168.2	841.3	368.7	69.2364	2.2818	0.43825	393941	4595.8	1819.3	317	85.7177	5.73912	0.174243	81166.8	1360.4	363.6	291	59.6639	1.24948	0.80033	48281.4	1606.9	430	178.1	30.0463	2.41437	0.414186	72604.6	2543.8	514.4	216.3	28.5418	2.37818	0.42049	736038
21813.8	756.3	212.9	151.5	28.8428	1.40528	0.711602	170278	2910.3	599.1	486	58.5086	1.23272	0.811217	22432.3	890.1	295	100.9	25.202	2.92369	0.342034	391838	4536.1	1765.8	323.5	86.382	5.45842	0.183203	12998.1	884.5	337.5	53.1	14.6954	6.35593	0.157333	18640.3	751.4	237.6	118.8	24.8074	2	0.5	371986	4045.9	1354.3	464.7	91.9414	2.91435	0.343129	9819.5
75935.2	1613.6	559	184	47.0595	3.03804	0.329159	136256	1731.5	616	293.3	78.6928	2.10024	0.476136	7822.2	528	173.1	69.8	14.8148	2.47994	0.403235	185197	2387.3	652.8	423.8	77.5759	1.54035	0.649203	62982.8	1248.5	412.4	211.5	50.4468	1.94988	0.512852	111634	2595.3	448.3	368.7	43.014	1.21589	0.82244	21965.9	617.1	182.2	155.5	35.5954	1.1717	0.853458	70080
48828.9	1879.4	856.1	83.7	25.9811	10.2282	0.097769	38796.4	1078.1	300.3	189.5	35.9859	1.5847	0.631036	18006.7	652.4	160.7	147.9	27.6007	1.08654	0.920348	239673	2377.2	743.3	414.9	100.822	1.79152	0.558186	653274	6414.2	2569	358.9	101.848	7.15798	0.139704	320409	5704.8	1359.3	351.3	56.1648	3.86934	0.258442	154344	3745.1	712.5	348.3	41.2123	2.04565	0.488842	29701.9
96491.8	1822	602.3	229.4	52.9593	2.62554	0.380873	14559.4	589.5	236.3	83.8	24.6979	2.81981	0.354634	38543	1219.8	301.1	186.4	31.5978	1.61534	0.619063	75808.4	1307.3	421.1	232	57.9885	1.81509	0.550938	21002.7	640.5	210	133.7	32.7911	1.57068	0.636667	604947	10064.7	1996.8	583.9	60.1058	3.41976	0.292418	946085	12775.5	2551.5	983.1	74.0546	2.59536	0.385303	31263.3
61745.8	1298.9	365.4	230.5	47.537	1.58525	0.630816	237874	3622.1	1134.1	294	65.6728	3.85748	0.259236	103047	1668	426.1	322.9	61.7785	1.3196	0.757803	270734	6045	1040.6	609.4	44.7864	1.70758	0.585624	33215	1243.1	526.8	87.3	26.7195	6.03436	0.165718	44524.9	1883.6	424	202.8	23.6382	2.09073	0.478302	10007.1	633.6	231.6	59.8	15.794	3.87291	0.258204	17570.7
167636	2686.2	1040	231.1	62.4065	4.50022	0.222212	63662.1	1569.2	642.8	135.5	40.5698	4.74391	0.210797	9079.4	703.2	205.9	80.6	12.9115	2.55459	0.391452	290378	3792.8	891.1	442.6	76.5602	2.01333	0.496689	434335	7146.6	2138.5	550.1	60.775	3.88748	0.257236	863833	9191	2605.4	670.1	93.9868	3.88808	0.257197	72797.2	1323	404.1	239	55.0243	1.69079	0.591438	28931.3
296096	5781.6	2107.5	417.2	51.2135	5.05153	0.19796	106357	2143.4	773.5	213.7	49.6206	3.61956	0.276277	8876.6	441.8	156.6	79.1	20.0919	1.97977	0.505109	518249	5762.2	1400.7	650	89.9395	2.15492	0.464054	78074.5	1781.7	438.2	249.3	43.8202	1.75772	0.568918	808409	8697.3	1294.4	857.3	92.9494	1.50986	0.662315	64797.6	1283.8	436.7	196.9	50.4733	2.21788	0.450882	117672
25337.1	689.9	208.8	158.9	36.7258	1.31403	0.761015	282581	4097.4	1584.5	242.8	68.9659	6.52595	0.153234	480984	6429.3	1186.8	707	74.8112	1.67864	0.59572	220800	3244.7	733.5	460	68.0493	1.59457	0.62713	21910.1	823.7	315.3	93.4	26.5996	3.3758	0.296226	21616.1	824.7	288.7	99.1	26.2109	2.91322	0.343263	14392.1	1291.9	351.5	145.7	11.1403	2.41249	0.414509	137382
24865.6	747.1	217.5	155.3	33.2828	1.40052	0.714023	40150	1346.2	311.6	219.9	29.8247	1.41701	0.705712	113180	1943.7	556.7	297.3	58.2294	1.87252	0.53404	13393.5	481	150.1	115.6	27.8451	1.29844	0.770153	41457.9	943.3	285.8	204.2	43.9499	1.39961	0.714486	8907	580.4	205.5	64.2	15.3463	3.20093	0.312409	68168.8	1689.2	658.9	147.3	40.3557	4.47318	0.223554	19993.9
310615	4379.9	1988.5	216.1	70.9183	9.20176	0.108675	190048	4009.8	1057.4	326.4	47.396	3.23958	0.308682	33645.9	1199.3	278.5	170.6	28.0546	1.63247	0.612567	342730	3916.6	903.5	556.4	87.507	1.62383	0.615827	21793.5	1203.7	496.7	82.6	18.1054	6.01332	0.166298	41782.3	2292.8	409.4	199.1	18.2233	2.05625	0.486321	1237669	8556	1885.1	1070.7	144.655	1.76062	0.56798	393039
9626.9	450.5	154.1	83.7	21.3694	1.8411	0.543154	417900	4615.4	1353.9	476.2	90.5446	2.84313	0.351725	127517	2455.7	522.4	339.8	51.9269	1.53737	0.650459	48474	1076.9	409.1	156.7	45.0125	2.61072	0.383036	10103.4	755.7	227.4	92.9	13.3696	2.44779	0.408531	680755	5611.9	1239.3	807	121.306	1.53569	0.651174	2.09501e+06	27464.3	5070.2	1805.8	76.2813	2.80773	0.35616	901357
28444.6	1076.6	352.9	124	26.4208	2.84597	0.351374	21352.5	819.9	233.2	128.2	26.0428	1.81903	0.549743	62511.3	1722.4	367	264.1	36.2931	1.38963	0.719619	20581.9	735.5	219.5	125.3	27.9835	1.7518	0.570843	46010.3	1305	468.7	142.3	35.2569	3.29375	0.303606	1.54713e+06	13320.4	2874.1	1539	116.148	1.86751	0.535472	7923.5	1286.4	633.9	40	6.15944	15.8475	0.0631014	707025
108410	2539.8	713	280	42.6845	2.54643	0.392707	128414	3852.7	534.5	385.1	33.3309	1.38795	0.720486	111933	2122.9	540.5	303.5	52.7266	1.78089	0.561517	213951	3146.7	881.1	354.6	67.9921	2.48477	0.402451	534846	6237.8	2262.8	320.8	85.7428	7.05362	0.141771	59966.4	1262.8	461.9	174	47.4869	2.6546	0.376705	537189	6106.8	2003	364.2	87.9656	5.49973	0.181827	34502.6
12465.8	515.2	209.3	78.3	24.196	2.67305	0.374104	636651	6122.3	1878.4	501.1	103.989	3.74855	0.26677	72929	1721.6	404.9	258.5	42.3612	1.56634	0.638429	194454	3534.1	1503.1	180.1	55.0221	8.34592	0.119819	1.27007e+06	13587	3230.6	2199.2	93.4767	1.46899	0.68074	771017	4895	1409.1	716	157.511	1.96802	0.508126	19299.4	640.9	177.4	147.5	30.113	1.20271	0.831454	35151.5
113774	1808.8	507	332.8	62.9	1.52344	0.65641	976045	6545.6	1893.5	750.8	149.115	2.52198	0.396514	285906	3209.6	1057.8	364.5	89.0785	2.90206	0.344583	12567.1	673.8	153.9	144.5	18.6511	1.06505	0.938921	37995.5	1122.2	411.5	136.3	33.858	3.01908	0.331227	42826.7	1035.4	262	224.6	41.3625	1.16652	0.857252	36555.8	865.2	274	175.3	42.2513	1.56303	0.639781	2.35898e+06
39790.1	899.6	243.3	214.9	44.2309	1.13215	0.883272	788790	9042.4	1794.1	735.4	87.2324	2.43962	0.409899	68219.5	1361.4	400.7	247.2	50.1098	1.62095	0.61692	351976	3670.6	1017.7	488.9	95.8907	2.08161	0.480397	32170.7	971.4	379.9	112.4	33.1179	3.37989	0.295867	24084.9	947.4	234.4	176.4	25.4221	1.3288	0.75256	69517.3	1949.8	469.8	216.2	35.6536	2.17299	0.460196	68224.6
95102.7	2015.4	701.6	190.5	47.188	3.68294	0.271522	238173	2383.3	822.9	377.2	99.934	2.1816	0.458379	34350.5	855.4	250.9	190.8	40.1572	1.31499	0.760462	57629.4	1731.5	393.1	261.5	33.2829	1.50325	0.665225	37493.6	1189.9	478.9	107.9	31.5099	4.43837	0.225308	69010.3	2696.2	448.6	313.5	25.5954	1.43094	0.698841	372107	3973.2	1360.9	459.2	93.6543	2.96363	0.337424	2.6952e+06
14660.8	700	196.9	118.8	20.944	1.65741	0.603352	25428.3	921.9	330.1	107.3	27.5825	3.07642	0.325053	56509.1	1125.3	290.9	267.5	50.2169	1.08748	0.91956	11416.4	531.8	221	68.1	21.4675	3.24523	0.308145	50892.1	974.2	340.5	192.9	52.2399	1.76516	0.56652	72204.1	1786.2	357.8	294.6	40.4233	1.21453	0.823365	21945.6	610.8	182.5	155.1	35.9293	1.17666	0.849863	827779
425636	6258.9	1541.9	522.5	68.0048	2.951	0.338868	363013	6338.2	2066.3	403	57.2738	5.1273	0.195035	16333.7	659.6	190.5	118.2	24.763	1.61168	0.620472	219664	3327.3	929.1	316.6	66.0187	2.93462	0.34076	374464	4308.3	1377.8	464.9	86.917	2.96365	0.337422	68518.6	1819.7	487.8	217.8	37.6538	2.23967	0.446494	154608	3705	714.3	347.5	41.7295	2.05554	0.48649	268493
70901.2	1280.6	344.8	279.9	55.3656	1.23187	0.811775	897028	6266	2631.3	460.4	143.158	5.71525	0.174971	31942.6	888	249.9	173.6	35.9714	1.43952	0.694678	433463	3828.6	1322.1	436.5	113.217	3.02887	0.330157	401297	5489	2257.9	240.5	73.1093	9.38836	0.106515	292933	4091	1251	324.3	71.6042	3.85754	0.259233	945451	12869.3	2552	983	73.4656	2.59613	0.385188	47110.3
22305.5	696.4	196.7	159.1	32.0297	1.23633	0.808846	203087	5364.7	1576.9	332.5	37.8562	4.74256	0.210857	299771	4286.4	778.9	570	69.9355	1.36649	0.731801	410407	5930.8	1530.1	463.2	69.1992	3.30332	0.302725	11705.3	508.7	172.9	91.3	23.0102	1.89376	0.528051	9875.3	1365.3	337.4	130.5	7.23306	2.58544	0.386781	10194.6	673.6	240.1	58.9	15.1345	4.0764	0.245314	9991.9
78515.5	1381.6	465	224.7	56.8294	2.06943	0.483226	59601.4	1054.6	347.3	223.1	56.5156	1.5567	0.642384	21555.3	1173.3	331.8	102.7	18.3715	3.23077	0.309524	178708	2525.2	717.3	336.1	70.7698	2.13419	0.468563	8019.9	616.5	289.3	38	13.0088	7.61316	0.131352	168726	3623.6	956.9	379.2	46.5632	2.52347	0.39628	71869.5	1234.6	402.8	234.1	58.2128	1.72063	0.581182	3.14546e+06
19679.6	703.1	209.8	134.1	27.9898	1.5645	0.63918	25007.6	1440	614.7	85.9	17.3664	7.156	0.139743	25210.3	937.6	270.9	140.1	26.8881	1.93362	0.517165	394788	4824.1	952.4	662.5	81.8366	1.43758	0.695611	822603	8164.6	2532.1	623.8	100.752	4.05915	0.246357	2.10685e+06	11247.4	2421.1	1179.2	187.319	2.05317	0.487051	64665.8	1221.1	435.5	196.6	52.957	2.21516	0.451435	11933.5
60402.4	1797.7	367.9	280.8	33.5998	1.31019	0.763251	36966.4	1026.4	250.3	206.2	36.0156	1.21387	0.823811	524307	6237.4	1172.2	648.9	84.0586	1.80644	0.553574	1.04761e+06	6843.9	1684.8	851.4	153.072	1.97886	0.505342	14863.6	628.3	237.5	83.5	23.6569	2.84431	0.351579	11467.1	817.1	339.6	63.2	14.0339	5.37342	0.186101	14311	1268.6	351.7	146.3	11.2809	2.40396	0.41598	185253
275996	3433.1	1033.3	394.6	80.3926	2.6186	0.381883	32353.2	952.9	326.5	131	33.9524	2.49237	0.401225	42086.5	1633.9	359	222.6	25.7583	1.61276	0.620056	55267.1	1280.7	371	202.3	43.1538	1.83391	0.545283	541878	6967.8	3063.4	300.2	77.7689	10.2045	0.0979957	958145	7845.7	2041.3	673.6	122.124	3.03043	0.329986	68194.1	1698.3	659.6	147.2	40.1543	4.48098	0.223166	807532
135557	2426.2	803.4	259.1	55.8721	3.10073	0.322504	680248	9060.9	3778.4	301.3	75.0751	12.5403	0.0797427	2.01582e+06	12002.6	2876	1007.4	167.949	2.85487	0.350278	2.40845e+06	9578.4	2884.5	1111.5	251.446	2.59514	0.385335	19339.9	662.8	226.4	113.9	29.1791	1.98771	0.503092	424059	7136.3	1526.7	567.5	59.4228	2.69022	0.371717	1.45118e+06	11580.7	1802.8	1390.1	125.31	1.29689	0.771078	16207
1.39227e+06	16513.1	3698.4	835	84.3132	4.42922	0.225773	203031	4363.4	1607.7	228.5	46.5305	7.03589	0.142129	120967	3016.2	551.4	320.6	40.1058	1.7199	0.581429	297034	3576.4	830.8	518.3	83.0539	1.60293	0.623857	56564.8	1733.9	603.6	147.2	32.6229	4.10054	0.24387	7725.8	693.3	169.6	86.4	11.1435	1.96296	0.509434	21393	895.6	236.3	155.9	23.8868	1.51572	0.659755	17920.5
187220	2791.2	609.6	454.9	67.0749	1.34007	0.746227	25631.1	878.2	347.9	102.9	29.1859	3.38095	0.295775	25762.9	1177.3	315.8	152.8	21.883	2.06675	0.483851	192786	2574.1	957	270.7	74.8944	3.53528	0.282863	688035	5690.2	2084.8	473.1	120.916	4.40668	0.226928	668092	6147.6	1984.3	457	108.675	4.34201	0.230308	1926880	16482.7	5082.4	746.9	116.903	6.80466	0.146958	106083
11705.3	497	157	99.7	23.5519	1.57472	0.635032	23740.2	763	275.1	116.3	31.1143	2.36543	0.422755	221976	4880.3	724.7	531.3	45.484	1.36401	0.733131	61700.2	1461.7	633.3	144.6	42.2113	4.37967	0.228328	118960	2740.6	1071.5	152.1	43.4064	7.04471	0.141951	12181.9	991.1	195	123.8	12.2913	1.57512	0.634872	616100	7364.2	2387.5	368.4	83.6614	6.48073	0.154304	614609
518979	6324.3	2390.8	308.7	82.0611	7.74474	0.12912	63844.6	2046.4	489.6	294.3	31.1985	1.66361	0.601103	47536.2	1317	312.2	211.1	36.0943	1.47892	0.676169	29529.5	1034.3	317.4	156.4	28.5502	2.02941	0.492754	18959.7	602.6	184.6	136	31.4632	1.35735	0.736728	122964	1828.1	511.3	326.5	67.2635	1.566	0.638568	15441.5	1898.2	638	130.9	8.13481	4.87395	0.205172	56777.8
18670.8	675.8	230.8	107.8	27.6277	2.141	0.467071	72792.1	2005.3	590	208.2	36.2999	2.83381	0.352881	162095	2062.7	521.5	421.1	78.5841	1.23842	0.807478	77491.5	1398.5	454.3	232.4	55.4104	1.95482	0.511556	232211	4036.6	1588.1	218.8	57.5264	7.25823	0.137775	546009	8213.7	1418.8	596.2	66.4754	2.37974	0.420214	12131.2	1702.3	536.2	244.4	7.12636	2.19394	0.4558	65994
109196	2473.2	800	275.9	44.1516	2.8996	0.344875	250826	3945.2	1222.2	298.2	63.5775	4.09859	0.243986	26102.6	999.5	245.1	151.1	26.1157	1.6221	0.616483	32393.7	1430	605.6	83	22.6529	7.29639	0.137054	25935.3	863.9	325.5	109.1	30.0212	2.9835	0.335177	961932	8469.2	1959.5	749.1	113.58	2.61581	0.382291	305961	6014.4	1466	394.8	50.8714	3.71327	0.269304	384203
23988.6	807	231.8	152.7	29.7257	1.51801	0.658758	1.27895e+06	6592	2389.8	710.6	194.015	3.36307	0.297347	14676	703.8	151.6	133	20.8525	1.13985	0.877309	584471	3823.4	935.9	845.1	152.867	1.10744	0.902981	11031.1	502.8	184.1	84.8	21.9393	2.17099	0.460619	26391.5	1321.6	291.2	151.2	19.9694	1.92593	0.519231	433042	3386.5	1411.6	409	127.873	3.45134	0.289742	2.94359e+06
122153	2507.4	638.9	289.4	48.7171	2.20767	0.452966	232515	2863.2	1196.5	255.2	81.2081	4.68848	0.213289	443034	4433.2	1271.3	526.7	99.9354	2.41371	0.4143	1.56634e+06	7282	2129.6	977.6	215.097	2.1784	0.459053	586149	6579.4	2776.4	287.7	89.0885	9.65033	0.103623	1.05282e+06	7989.5	2604.7	540.4	131.775	4.81995	0.207471	845172	11572.6	3235.1	394.7	73.0322	8.19635	0.122006	180173
340231	3529.6	839.2	561.1	96.3935	1.49563	0.668613	29524.4	893	284	139	33.062	2.04317	0.489437	72863.1	1667.1	598.1	165.3	43.7065	3.61827	0.276375	38233.7	1007.1	331.8	151.9	37.9642	2.18433	0.457806	117312	1983.6	840.5	186.9	59.141	4.49706	0.222368	805986	15979.9	3286.6	1658	50.4375	1.98227	0.504473	11477.2	1249.3	533.2	38.3	9.1869	13.9217	0.0718305	85344.1
8922.2	731.8	223.4	75.8	12.1921	2.94723	0.339302	44195.4	1317.4	429	158.5	33.5474	2.70662	0.369464	8709.3	518.2	152.2	83.3	16.8068	1.82713	0.547306	547718	4460.7	1126.3	647.4	122.787	1.73973	0.574802	67073.8	1458.2	451.3	208.4	45.9977	2.16555	0.461777	11857.4	1074.8	274.3	95.1	11.0322	2.88433	0.346701	42350.1	1530.1	390.2	157.6	27.678	2.47589	0.403895	10843.5
416242	5480.2	1802	425.7	75.9538	4.23303	0.236238	75691.8	1967.1	776.4	202.8	38.4789	3.8284	0.261206	86905.5	1627.7	518.3	224.8	53.3916	2.3056	0.433726	341163	5705.4	1393	509.8	59.7966	2.73244	0.365973	18853.3	805.8	196.4	155.6	23.397	1.26221	0.792261	13520.2	1099.2	270.9	123.7	12.3	2.18998	0.456626	1.55848e+06	12759.4	2690.7	1023.7	122.144	2.62841	0.380459	68569.3
42684.7	1189	285.1	209	35.8997	1.36411	0.733076	1103273	7453.9	2630	610.7	148.013	4.30653	0.232205	23207.9	696.3	199.3	158	33.3303	1.26139	0.792775	830000	7773.8	2978	418	106.769	7.1244	0.140363	13155.2	590	181	98.6	22.2969	1.8357	0.544751	15081.6	1366.9	306.4	133.6	11.0334	2.29341	0.436031	8141.5	553.2	214.7	52.9	14.7171	4.0586	0.24639	42563
9768.8	577	173.8	92	16.9303	1.88913	0.529344	94616.1	2146.6	928.4	145.8	44.0772	6.36763	0.157044	15771	850.7	182.2	124.5	18.5389	1.46345	0.683315	297987	3489.9	1226.8	338.2	85.3855	3.62744	0.275677	411588	5964.9	2030.2	291.6	69.0017	6.96228	0.143631	723374	6792.4	1886.7	789.6	106.498	2.38944	0.418509	8019.9	1233.3	296.6	110.4	6.5028	2.68659	0.372218	391336
641345	7277.7	1822.4	631	88.1247	2.88811	0.346247	111330	2405.6	494.2	376.6	46.2795	1.31227	0.76204	257928	4025.7	787.7	612.4	64.0704	1.28625	0.777453	278434	2611.6	657.1	566.7	106.614	1.15952	0.862426	955453	7160.1	2088.1	698	133.441	2.99155	0.334275	575853	6690.4	1203.3	725.6	86.0716	1.65835	0.603008	54126.4	2214	657.8	184.8	24.4473	3.55952	0.280936	324318
1.03912e+06	16596.3	2618	984.3	62.6115	2.65976	0.375974	375570	5199.2	1499.2	418.2	72.2361	3.58489	0.278949	33727	826.5	252.1	185.4	40.807	1.35976	0.735422	21362.6	872.6	250.2	139.2	24.4815	1.79741	0.556355	103523	1919.1	616	242.1	53.9436	2.5444	0.393019	47921.4	1572	516.6	139.5	30.4844	3.70323	0.270035	11289.6	1354.8	442.1	139	8.33304	3.18058	0.314409	347738
1.05586e+06	10045.6	2833	631.1	105.107	4.48899	0.222767	1.00335e+06	10953.3	2403.9	759.7	91.6025	3.16428	0.316028	15254	683	236.4	97.4	22.3338	2.4271	0.412014	79894.4	1303.4	369.1	286.9	61.2969	1.28651	0.777296	38761	1347.3	368.2	186.4	28.7694	1.97532	0.506247	268407	2896.5	900.1	432	92.6659	2.08356	0.479947	242335	6534.7	865.8	660	37.0843	1.31182	0.762301	8258.1
29661.3	924.6	272.2	151	32.0801	1.80265	0.554739	140048	2535.4	701.3	305.9	55.2372	2.29258	0.43619	1.91717e+06	7455.7	1786.3	1392	257.141	1.28326	0.779264	210255	2437.5	973.1	285.4	86.2585	3.4096	0.293289	237833	2475.9	875.8	363.9	96.0592	2.40671	0.415506	20622.5	699.5	214.8	138.6	29.4818	1.54978	0.645251	86160.2	1581.6	430.1	287.1	54.4766	1.49808	0.667519	498625
15563.2	757.2	177.4	126.6	20.5536	1.40126	0.713641	21509.6	713.5	259.8	108.1	30.1466	2.40333	0.416089	34771.3	941.9	269.5	178.4	36.9161	1.51065	0.661967	285106	4720.5	1455.5	413.6	60.3973	3.5191	0.284164	22548.9	650.5	224	132	34.664	1.69697	0.589286	319274	2979.4	897.4	463.3	107.16	1.93697	0.516269	334852	3469	1221.7	389.5	96.5269	3.13659	0.318818	12217.4
18255.1	1072.9	435.4	62.9	17.0147	6.9221	0.144465	903958	8052	2850.2	483.4	112.265	5.89615	0.169602	598879	4071	1178.3	676.9	147.108	1.74073	0.574472	15030.9	947.4	214.2	155.6	15.8654	1.37661	0.726424	10017.2	540.1	190.3	74.5	18.5469	2.55436	0.391487	16637.9	696.2	179.8	142.1	23.8982	1.26531	0.790323	115664	1794.1	543.8	309.3	64.4693	1.75816	0.568775	228576
84330.2	1968.4	521.8	241.2	42.842	2.16335	0.462246	8648.5	522.4	225.2	50.4	16.5553	4.46825	0.223801	1575157	5812.5	1558.3	1344.5	270.995	1.15902	0.862799	52869.2	1228	405.7	188	43.0531	2.15798	0.463397	406544	5294.3	1506.4	493.6	76.789	3.05186	0.327669	579351	4070.7	989.2	773.9	142.322	1.2782	0.782349	131212	2676.2	639.8	289.8	49.0294	2.20773	0.452954	18006.7
11005.8	601.8	193.5	91.7	18.2881	2.11014	0.473902	39942.1	1210.7	434.6	156.5	32.9909	2.777	0.360101	12257.9	543.4	216	76.4	22.5578	2.82723	0.353704	37321.2	915.3	269.7	183.3	40.7748	1.47136	0.679644	34553.3	881.3	281.3	179.9	39.2072	1.56365	0.639531	506777	7500.3	1192.4	632	67.5676	1.88671	0.530023	10438	760.1	222.9	79.9	13.7324	2.78974	0.358457	316637
22873.3	765.6	218.6	146.1	29.8763	1.49624	0.668344	813757	7763.6	2099.6	583	104.817	3.60137	0.277672	43435	1129.7	405.4	149.7	38.4483	2.70808	0.369265	250258	3532.4	1240.4	293.5	70.8465	4.22624	0.236617	160990	2586.2	1107.9	192.3	62.2497	5.76131	0.173572	10473.5	1012.3	252.6	119	10.3462	2.12269	0.471101	11330.2	536.7	152.2	103	21.1109	1.47767	0.676741	12638.1
162364	2571.8	1001.5	221	63.1325	4.53167	0.220669	316997	2861.9	942.4	472.1	110.765	1.99619	0.500955	8978	616.5	190.7	78	14.5629	2.44487	0.409019	199417	2739.2	734.6	378.2	72.8011	1.94236	0.514838	797053	12084.9	3329.4	769.9	65.9545	4.32446	0.231243	11527.9	465.7	156.5	95.9	24.7539	1.63191	0.61278	1.97457e+06	15108.1	2485.9	1614.2	130.696	1.54002	0.649342	1.54409e+06
51277.4	1473.6	631.8	108.5	34.7974	5.82304	0.171732	174865	2589.8	1062.2	214.4	67.5208	4.95429	0.201845	45863.2	926.4	310.5	195.7	49.5069	1.58661	0.630274	995578	7054.9	1996.7	706	141.119	2.82819	0.353583	25473.9	1247.5	482.2	90.9	20.42	5.30473	0.188511	1.17385e+06	9142.4	2132.9	728.3	128.396	2.9286	0.34146	23861.9	876.6	341.6	93.6	27.221	3.64957	0.274005	41670.8
35339.1	1020.6	291.3	168.6	34.6258	1.72776	0.578785	12415.1	754.8	184.7	108.3	16.4482	1.70545	0.586356	44960.9	1123.7	305	204.2	40.0115	1.49363	0.669508	513920	5564.9	1543.9	581.3	92.3502	2.65594	0.376514	175996	2716.4	952.6	261	64.7901	3.64981	0.273987	30817.1	777.8	222.3	180.8	39.6209	1.22954	0.813315	16724.1	1220.4	534.7	54.2	13.7038	9.86531	0.101365	289785
130802	1742.4	472.1	363.3	75.0699	1.29948	0.76954	31653.6	885.5	327.9	134.2	35.7466	2.44337	0.409271	30903.3	891.5	263.6	159	34.6644	1.65786	0.603187	104147	2227.6	781.8	192	46.7528	4.07187	0.245587	47718.7	1795.3	822.1	84.6	26.5798	9.71749	0.102907	46349.9	1083.2	341.6	195.2	42.7898	1.75	0.571429	17682.2	714.3	257.6	93.3	24.7546	2.76099	0.362189	38380.8
45944.4	1274.1	388.5	181.6	36.0603	2.13932	0.467439	519968	4729.8	1239.3	649.4	109.934	1.90838	0.524005	25727.4	730.8	201.3	176.1	35.2044	1.1431	0.874814	32824.6	1087.7	298.6	161.2	30.178	1.85236	0.539853	25240.8	891.1	251.3	148	28.3254	1.69797	0.588938	614533	7216.8	1495.1	580.8	85.1531	2.57421	0.388469	24363.7	761	217.4	151.4	32.0154	1.43593	0.696412	704729
179093	2519.6	634.9	385.6	71.0801	1.64652	0.60734	364675	5424.5	1191.4	782.1	67.2275	1.52333	0.656455	18909	714.3	199.1	131.7	26.4721	1.51177	0.661477	162886	2426	755.3	290.3	67.1419	2.60179	0.384351	34543.2	913.4	347.6	132.5	37.8183	2.6234	0.381185	1.85188e+06	12838.3	2032.7	1555.4	144.246	1.30687	0.765189	344088	3881	1137.4	402.5	88.6597	2.82584	0.353877	44393.1
178196	3236.7	1408	170.2	55.0548	8.27262	0.120881	739622	8233.8	2473.6	425.2	89.8275	5.8175	0.171895	336504	4249.5	1169.2	575.6	79.1868	2.03127	0.492302	39546.7	1148	288.4	213.6	34.4483	1.35019	0.740638	180381	2153.3	829.4	286.6	83.7695	2.89393	0.345551	56646	1611	328.6	249.9	35.162	1.31493	0.760499	896967	8342	1733.7	1016.8	107.524	1.70506	0.586491	190849
33209.9	859.8	307	143.7	38.6251	2.1364	0.468078	1.056e+06	8772.9	2306.5	756.4	120.37	3.04931	0.327943	114803	1523.7	466.5	323.5	75.3446	1.44204	0.693462	24612.1	915.3	200.9	170.9	26.8897	1.17554	0.850672	58506.4	1118.8	359	225.4	52.2939	1.59272	0.627855	522077	5885.3	1678.3	424.9	88.7086	3.94987	0.253173	299675	3144.2	949.2	438.8	95.3104	2.16317	0.462284	26776.8
77947.8	1517.6	575.8	177.1	51.3625	3.25127	0.307572	9079.4	446.5	172.2	69.7	20.3346	2.47059	0.404762	13185.6	629.6	182.3	115	20.9428	1.58522	0.630828	229889	2918.2	766.8	399.7	78.7777	1.91844	0.521257	239962	2727.3	1007.4	315.2	87.9852	3.19607	0.312885	786985	8579.9	2067.6	528.6	91.7243	3.91146	0.255659	127593	3405.2	541.8	388.8	37.47	1.39352	0.717608	86900.4
24074.8	705.2	202.7	154.7	34.139	1.31028	0.763197	146167	2038.1	588.1	333.3	71.7174	1.76448	0.56674	235734	3827.4	1004.1	378	61.5912	2.65635	0.376457	14995.4	859	318.9	76.1	17.4568	4.19054	0.238633	114569	1551.5	459.1	327.6	73.8443	1.4014	0.71357	19127	1060.4	296.2	160	18.0375	1.85125	0.540176	56458.4	1230	362	238	45.9011	1.52101	0.657459	50359.8
80594	2954	878	218.7	27.283	4.01463	0.249089	390180	7621.5	1614.5	440	51.1946	3.66932	0.27253	188330	2619.9	1040.3	242.2	71.8843	4.29521	0.232817	341980	4554	979.7	555	75.0943	1.76523	0.5665	212648	3573.6	1276	307.8	59.5052	4.14555	0.241223	709945	9216.7	2173.7	463.1	77.0281	4.6938	0.213047	67220.8	1635.1	411.4	222.4	41.1111	1.84982	0.540593	283747
7979.3	554.3	217.3	53.7	14.3953	4.04655	0.247124	51921.2	1534.2	556	131.7	33.8425	4.22172	0.236871	458389	3154	889.9	683.8	145.336	1.3014	0.768401	522300	8397.8	1458.6	743.3	62.1948	1.96233	0.509598	421149	4908.7	1573	405.1	85.7964	3.88299	0.257533	56270.8	1904.6	341.9	255.6	29.5447	1.33764	0.747587	480456	4812.6	1128.1	580.9	99.833	1.94199	0.514937	636484
22432.3	835.5	214.5	149.7	26.849	1.43287	0.697902	163611	3143.8	1066.8	244.6	52.0425	4.36141	0.229284	1.03507e+06	5809.7	1388.5	978.1	178.163	1.41959	0.704429	859798	6919.7	1523	797.8	124.254	1.909	0.523835	386332	4837.6	1852.3	279.3	79.8603	6.63194	0.150786	1.39662e+06	9553.6	2894.9	660.8	146.188	4.3809	0.228263	24718.6	1034.9	435.1	79	23.885	5.50759	0.181567	35714.2
49969.5	1097.6	360.7	184.8	45.5261	1.95184	0.512337	10696.5	755.6	252.1	60.6	14.1563	4.16007	0.240381	32611.7	990	275.1	171.8	32.9411	1.60128	0.6245	256524	3279.5	864.1	454.5	78.2204	1.90121	0.525981	117996	1924.6	623.6	278.8	61.3095	2.23673	0.447081	116840	5640.7	1040.6	369.3	20.7138	2.81776	0.354891	321474	3938.9	1329.2	320.3	81.6151	4.14986	0.240972	973277
39668.4	976.5	309.9	174.4	40.623	1.77695	0.562762	110671	2397.5	1072.1	160	46.161	6.70062	0.14924	451089	3540.9	997.3	617.9	127.394	1.61402	0.619573	19142.2	932.5	318.1	128.1	20.5278	2.48322	0.402704	96583	1859.6	612.3	237.6	51.9375	2.57702	0.388045								45969.7	1241.1	342.2	202.6	37.0395	1.68904	0.592051	12323.8
970986	10196	2392.7	988.7	95.232	2.42005	0.413215	12192	584.2	202.9	85.6	20.8696	2.37033	0.421883	23192.7	779.6	246	129.1	29.7495	1.9055	0.524797	28018.8	1340.3	288.2	181.7	20.9049	1.58613	0.630465	28028.9	778.6	216.3	174.8	35.9991	1.23741	0.808137					63.3884	2.49907	0.467358	14797.7	770.4	343.4	60	19.2078	5.72333	0.174723	262237
72366.3	1549.7	552.2	174.1	46.697	3.17174	0.315284	42694.8	992.2	341.4	173.1	43.0304	1.97227	0.50703	8476.1	482.7	164.2	72.5	17.5598	2.26483	0.441535	37143.8	1325.3	480.1	111.7	28.0267	4.29812	0.23266	698260	8825.6	3137.8	646.5	79.1176	4.85352	0.206036					45.2592	1.17616	0.168632	317986	3190.3	1092.1	391	99.6727	2.79309	0.358026	158405
46263.7	1253.1	548.8	111.6	36.9194	4.91756	0.203353	350516	4854	1884.5	263.2	72.2119	7.15995	0.139666	85303.5	1499.1	468.7	251.9	56.9031	1.86066	0.537444	12242.7	656.2	262.5	66.4	18.657	3.95331	0.252952	22959.5	631.2	222.4	134.4	36.3744	1.65476	0.604317								399361	9978.3	2092.6	645.1	40.0229	3.24384	0.308277	451566
104294	1554.7	492.6	286.2	67.0828	1.72117	0.580999	364174	5481.8	1068.2	631.1	66.4332	1.6926	0.590807	67038.3	1214.5	375	237.6	55.1983	1.57828	0.6336	41589.7	1232.6	340.7	171	33.7414	1.9924	0.501908	44246.1	1336.3	318.7	206.9	33.1109	1.54036	0.6492								28307.8	1032.5	303.7	130.2	27.4168	2.33257	0.428713	45275.2
154101	2254.8	500.5	446.3	68.3435	1.12144	0.891708	372888	4714.3	1689.4	409.8	79.0972	4.1225	0.242571	12116	498.2	154.2	103.6	24.3196	1.48842	0.671855	10331.5	955.5	219.2	100.5	10.8127	2.18109	0.458485	208638	3885.2	1263.8	343.3	53.7007	3.68133	0.271641								344018	5048.3	1853.7	293	68.1452	6.32662	0.158062	63155.1
81810.7	1604.2	485.6	232	50.9978	2.0931	0.477759	72067.2	1540.5	611.5	161.4	46.7817	3.78872	0.263941	65248.8	1167.1	364.7	234.8	55.9068	1.55324	0.643817	1.5586e+06	11964.5	3361.3	765	130.269	4.39386	0.227591	880613	7177.3	3046	390.4	122.694	7.80225	0.128168								14818	1630.6	385.2	127.6	9.08745	3.01881	0.331256	184305
18544	635.8	191.8	132.2	29.1664	1.45083	0.68926	190271	2410.3	677.2	377.6	78.941	1.79343	0.55759	21600.9	874.5	232.4	143	24.7009	1.62517	0.615318	337442	4065.1	875.6	544.8	83.0096	1.6072	0.622202	20652.9	679	188.4	150.1	30.4166	1.25516	0.796709								13211	1304.2	465.8	95.4	10.1296	4.8826	0.204809	1392510
42198	1019.9	309.6	180.7	41.3746	1.71334	0.583656	17768.4	684.4	215.3	110.5	25.962	1.94842	0.513237	17312.1	1063.7	274.2	140.4	16.2754	1.95299	0.512035	980075	14328.7	3977.7	1029	68.3995	3.8656	0.258692	136363	1704.5	646.3	279.2	80.0017	2.31483	0.431998								697702	10492	1584.5	995.3	66.4985	1.59198	0.628148	1.38934e+06
76208.9	1402.2	391.5	271.4	54.3495	1.44252	0.693231	36287.1	1020.6	424.2	113.3	35.5547	3.74404	0.267091	51769.1	1374.9	405.6	220.3	37.653	1.84113	0.543146	273182	4778.7	1141.4	421.2	57.1666	2.70988	0.369021	237032	2585.3	977.3	323.7	91.6845	3.01915	0.331219								53553.6	1720.6	366.8	218.6	31.125	1.67795	0.595965	19380.5
11401.2	622.2	227.7	70.4	18.324	3.23437	0.309179	475580	6849.8	1916.4	872.5	69.4297	2.19645	0.455281	89156.3	1838.8	452.4	301.8	48.4861	1.49901	0.667109	9900.6	646.8	205.7	64.7	15.3071	3.17929	0.314536	102808	2018.3	479.4	353	50.9381	1.35807	0.736337								24779.4	1097.6	413.3	84.5	22.576	4.89112	0.204452	144499
38167.8	1779.4	323.8	266.9	21.4498	1.21319	0.824274	92203	2095.4	872.3	147.9	44.0026	5.8979	0.169552	1.53186e+06	8541.6	1864	1073.8	179.342	1.73589	0.576073	8146.6	749.9	328.8	39.6	10.8636	8.30303	0.120438	39526.4	1281.7	350.8	197.7	30.839	1.77441	0.563569								1.95363e+06	18646.8	4175.5	1157	104.77	3.6089	0.277093	10265.6
26472.6	918.6	291.8	131.2	28.8184	2.22409	0.449623	82190.9	2441.4	1041.4	110.8	33.6655	9.39892	0.106395	25215.4	841.2	228	156.6	29.9755	1.45594	0.686842	7923.5	448	166	62.9	17.6864	2.63911	0.378916	62774.9	1181.8	358	228.2	53.118	1.5688	0.63743								8374.7	601.7	159.8	97.9	13.9184	1.63228	0.612641	39790.1
403112	3811.4	1000.2	561.6	105.765	1.78098	0.561488	21043.3	746.8	207.5	144.2	28.178	1.43897	0.69494	3.4365e+06	13869.3	3210.4	1590.4	247.778	2.01861	0.49539	8334.2	483.4	155.9	73.9	17.2408	2.10961	0.474022	364103	4800.3	2011	256.5	75.85	7.84016	0.127548								27577.8	1555.5	543.8	118.1	17.7292	4.60457	0.217175	27278.7
32632	820.9	288.5	151	39.7515	1.9106	0.523397	233022	2904.4	687	523	80.2307	1.31358	0.761281	1.08892e+06	10933	2027.4	765	99.5995	2.6502	0.377331	9287.2	624.6	274.4	45.1	14.869	6.08426	0.164359	114098	3128.6	1174.5	135.5	36.4693	8.6679	0.115368								405251	4977.9	1642.6	340.2	81.4101	4.82834	0.207111	35704.1
43495.8	1219	385	167.7	35.6815	2.29577	0.435584	9697.8	471	187.4	71.5	20.5898	2.62098	0.381537	101298	2412.2	469.2	365.7	41.9939	1.28302	0.779412	44109.2	1703.9	574.1	154	25.8872	3.72792	0.268246	28976.9	721.1	230.6	163.4	40.1843	1.41126	0.708586								323212	2926.7	993.4	441.4	110.436	2.25057	0.444333	10422.8
93151	1725.4	424.8	308.1	53.9881	1.37877	0.725282	38314.8	918.2	302.6	179.6	41.7282	1.68486	0.593523	36099.5	1407.3	335.8	165	25.6516	2.03515	0.491364	26528.4	795.6	278.9	128.9	33.3439	2.16369	0.462173	387310	4828.9	2200.2	234.8	80.2068	9.37053	0.106718								141179	2494.4	801.5	256.4	56.5983	3.12598	0.3199	33615.5
7994.5	598.7	253.1	53.9	13.3531	4.69573	0.212959	27471.3	1122.8	287.1	161.7	24.4668	1.77551	0.563218	25859.2	717.5	232.8	147.3	36.0407	1.58045	0.632732	788126	7496.3	1785.8	655.2	105.135	2.72558	0.366894	415157	3462.1	833.9	715.1	119.915	1.16613	0.857537								9449.4	1007.9	472.8	49.7	9.37533	9.51308	0.105118	652417
94930.4	1773.8	588.7	234.8	53.5181	2.50724	0.398845	189977	2573.1	739.2	381.2	73.8321	1.93914	0.515693	18772.1	920.1	221.7	128	20.4022	1.73203	0.577357	10559.6	573.1	162.7	114.3	18.4254	1.42345	0.70252	34685.1	1052.2	349.7	138.8	32.9644	2.51945	0.396912								21590.8	1628.5	331.9	162.6	13.2581	2.04121	0.489907	253862
50359.8	1480.5	484.4	170.5	34.0154	2.84106	0.351982	60873.9	1627.9	688.3	153.6	37.3941	4.48112	0.223159	200978	2454.1	706.3	408	81.8948	1.73113	0.577658	42745.5	991	312.8	183.4	43.1337	1.70556	0.586317	79493.9	2009.4	532.8	245.6	39.561	2.16938	0.460961								733214	12519	1584.2	843.6	58.5681	1.8779	0.532509	852984
734608	8317.4	2098.9	689	88.3218	3.0463	0.328267	239070	2884.7	1031.5	373.9	82.8751	2.75876	0.362482	290621	4472.1	1608.4	247.7	64.9854	6.49334	0.154004	82089.5	1425.1	435.5	258.5	57.6026	1.68472	0.593571	464579	4266.9	1220.6	512	108.88	2.38398	0.419466								170262	6408.9	882.1	482.9	26.5665	1.82667	0.547444	1.44461e+06
39663.3	1033.1	292.9	192.8	38.3925	1.51919	0.658245	122392	2822.8	949.2	233.4	43.3582	4.06684	0.245891	777140	4036.1	1296.3	793	192.547	1.63468	0.611741	18812.7	1120	327.9	173.1	16.7971	1.89428	0.527905	340084	2872.8	980.4	460.8	118.381	2.1276	0.470012								311279	6492.2	1102.4	619	47.9466	1.78094	0.561502	824357
37072.8	954.4	310	159.9	38.8441	1.93871	0.515806	234051	4381.6	868.3	557.9	53.4168	1.55637	0.64252	449573	5178.1	1325.5	570.3	86.8221	2.32422	0.430253	367053	3951.8	925.3	627.4	92.8825	1.47482	0.67805	15603.7	616.7	173.6	122	25.3019	1.42295	0.702765								10747.2	1013.7	223.3	172.9	10.602	1.2915	0.774295	10706.7
18833	836.4	308	86.6	22.5167	3.55658	0.281169	151029	2734.5	1043.4	195.9	55.2309	5.32619	0.187752	30386.2	979.1	370.1	113.8	31.0348	3.2522	0.307484	331121	3619.8	1302.1	347.6	91.4749	3.74597	0.266953	327897	2802.1	955.4	467.6	117.018	2.0432	0.489429								146548	4669.7	1073.5	332.5	31.3826	3.22857	0.309735	272559
107406	1736.6	599.5	240.7	61.8486	2.49065	0.401501	469050	7525.4	1941.8	416.2	62.3289	4.66555	0.214337	46877.1	1211	305.2	229.7	38.7094	1.32869	0.752621	43825.3	987.9	261.4	235.3	44.3621	1.11092	0.900153	95275.1	1574.3	464.8	269.8	60.519	1.72276	0.580465								405479	10405	1359.6	594	38.9697	2.28889	0.436893	250988
36089.4	799.4	243.5	190.2	45.1456	1.28023	0.781109	39278	861.9	305.4	166.8	45.5714	1.83094	0.546169	464138	4475.5	1205.3	540.2	103.706	2.23121	0.448187	18199.3	962.8	379.9	82.8	18.9025	4.58816	0.217952	15152.6	813	316.7	80.1	18.6379	3.95381	0.252921								170551	4445.1	1477.1	203.7	38.3684	7.25135	0.137905	3.26118e+06
106991	1740.1	506.9	287.2	61.4853	1.76497	0.566581	28936.4	948	371.2	103	30.5236	3.60388	0.277478	1.06007e+06	8957.8	2907.7	534.1	118.34	5.44411	0.183685	50735	1232.9	341.8	211.2	41.1509	1.61837	0.617905	225428	3319.8	992.1	353.7	67.9041	2.80492	0.356516								33301.2	1110.7	420.8	115.3	29.9822	3.64961	0.274002	8927.3
24247.1	776.2	302.8	107.6	31.2382	2.81413	0.35535	34005.8	1302.6	485	128.8	26.1061	3.76553	0.265567	23142	768.1	243.8	129.3	30.1289	1.88554	0.530353	14240.1	960.3	407.9	54.4	14.8288	7.49816	0.133366	23501.9	1041.7	424.6	74.2	22.5611	5.72237	0.174753								20369	3138.8	825.8	222	6.48942	3.71982	0.26883	830354
45214.4	1083	297.7	217.5	41.7492	1.36874	0.730601	14458.1	660.1	255.7	74.9	21.9029	3.41389	0.292921								9023.6	435.9	158.4	75.6	20.7011	2.09524	0.477273	37924.5	947.6	358.3	139.9	40.0216	2.56112	0.390455								52742.5	1311.6	493.3	143.3	40.2123	3.44243	0.290493	16404.7
448899	6132.2	1380.4	590.1	73.2036	2.33926	0.427485	186768	3755.8	682.3	456.2	49.728	1.49562	0.668621					57.6872	2.08101	0.551099	10012.1	609.1	282.4	49	16.4375	5.76327	0.173513	37062.7	820.4	263.1	187.4	45.1764	1.40395	0.712277								292669	3565.8	1450.7	267.3	82.0767	5.42724	0.184256	427405
18452.8	633.2	183.1	134.1	29.1421	1.3654	0.732387	169760	2283.5	731.6	325.2	74.3422	2.24969	0.444505					47.9543	0.955027	0.175389	950941	6862.6	2234.4	655.1	138.569	3.41078	0.293188	38877.6	926.5	273.3	197.5	41.9618	1.3838	0.722649								187554	3626.8	997.7	352.6	51.7134	2.82955	0.353413	217763
96780.7	2406.7	621.6	258.7	40.213	2.40278	0.416184	28591.7	851	293.8	134.8	33.5978	2.17953	0.458816								132860	2222.1	546.2	366.2	59.7903	1.49153	0.67045	306062	3404.9	836.8	484.5	89.8888	1.72714	0.578991								1.42036e+06	10534	2113.3	1193.2	134.836	1.77112	0.564615	1.595e+06
18574.4	831.2	272.8	114.5	22.3465	2.38253	0.419721	281085	3267.1	920	475.9	86.0351	1.93318	0.517283								260874	4166.6	1019.7	345.9	62.6106	2.94796	0.339217	451779	7962.8	2113.7	884.8	56.7361	2.3889	0.418602								536717	8908.6	1589.3	538.1	60.2471	2.95354	0.338577	19370.3
36251.6	1290.7	437	112	28.0868	3.90179	0.256293	22366.4	1193.9	592.4	52	18.7339	11.3923	0.0877785								513905	4596.2	1351.3	530	111.811	2.54962	0.392215	127456	2285.5	574.6	319.2	55.7672	1.80013	0.555517								23066	1115.5	477.7	66.5	20.6777	7.18346	0.139209	499583
555611	6109	2164.4	474.3	90.9496	4.56336	0.219137	286261	2687.4	710	559.1	106.52	1.2699	0.787465								611456	4828.6	1392.7	592.6	126.632	2.35015	0.425504	9074.3	537.7	211.8	56	16.8761	3.78214	0.2644								2254001	30115	6130.2	945.8	74.8465	6.4815	0.154285	9510.3
723085	7018.2	2134.3	469.2	103.03	4.54881	0.219838	13875.1	566.8	189.5	103.9	24.4797	1.82387	0.548285								489921	4623.7	1603.8	458.4	105.959	3.49869	0.285821	54668.9	1358.1	331.8	230.7	40.254	1.43823	0.695298								158947	2668.6	623.8	346.1	59.5621	1.80237	0.554825	527303
13515.1	604.9	228.4	79.4	22.3427	2.87657	0.347636	71311.9	1549.2	650.5	148.2	46.0314	4.38934	0.227825								9743.5	445.4	151.8	84.6	21.8758	1.79433	0.557312	126924	3076.8	957.3	257.6	41.2518	3.71623	0.26909								10042.6	1032.1	532.5	31.5	9.73026	16.9048	0.0591549	581881
183134	2100.5	654.6	402.7	87.1857	1.62553	0.615185	273532	3761.9	1096.5	339.5	72.7111	3.22975	0.309622								439333	4136.2	908.1	681.3	106.217	1.33289	0.750248	595730	6798.8	1541.9	1104	87.6229	1.39665	0.716								46694.6	1399.4	400.4	172	33.3676	2.32791	0.42957	2.58824e+06
9302.4	461.9	160	75	20.1394	2.13333	0.46875	21372.8	729.1	208.4	138.5	29.3139	1.50469	0.664587								495062	4953.6	1302.6	556.2	99.9397	2.34196	0.426992	394945	5192.5	2357.2	226.7	76.0607	10.3979	0.0961734								23567.8	2756.6	1091.2	214.9	8.54959	5.07771	0.196939	929574
28748.8	741.3	219.3	174.4	38.7816	1.25745	0.795258	58800.5	1556	527	164.6	37.7895	3.2017	0.312334								235248	4968.9	1247.4	443.5	47.344	2.81263	0.35554	713626	4792.9	1994	483.6	148.892	4.12324	0.242528								1.33588e+06	13743.7	2839.5	951.6	97.1998	2.98392	0.335129	100953
9748.5	556.3	166.8	100.9	17.5238	1.65312	0.604916	71220.6	1434.9	473.5	202.5	49.6345	2.33827	0.427666								14022.1	730.7	230.7	88.3	19.19	2.61268	0.382748	26842.7	1270	565.7	64.7	21.136	8.74343	0.114372								26868	3103.4	1029.4	232.4	8.6576	4.42943	0.225763	55703
257350	3168.6	724.7	507.4	81.2189	1.42826	0.700152	18980	653.2	172.9	149.9	29.057	1.15344	0.866975								45761.9	1303.8	302.4	206.3	35.0989	1.46583	0.682209	8136.5	511.7	215.7	51.9	15.9009	4.15607	0.240612								23471.5	1998	410.6	234.8	11.7475	1.74872	0.571846	50831.3
190282	3138.3	1071.9	243.9	60.632	4.39483	0.22754	302458	4057.7	1585.7	279.3	74.5393	5.67741	0.176137								19456.5	678.6	185.2	150.2	28.6715	1.23302	0.811015	120643	2593.3	937.3	179.7	46.5209	5.21592	0.191721								272848	5795.9	1356.2	337.3	47.076	4.02075	0.24871	61512.6
34766.2	993.1	322.7	160.2	35.0078	2.01436	0.496436	339404	3495.9	1383.3	354.7	97.0864	3.89992	0.256416								688086	6676.9	1845.9	577.8	103.055	3.1947	0.313018	203868	2957.2	1108.5	247.5	68.9394	4.47879	0.223275								1.65883e+06	11194.4	2199.9	1295.6	148.184	1.69798	0.588936	327897
88345.2	1712.1	727.9	159.7	51.6005	4.55792	0.219398	11325.1	460.2	164.2	90.2	24.6091	1.8204	0.54933								220840	2584.3	720.6	409.2	85.4545	1.761	0.56786	147597	1847.3	649.5	294.6	79.8987	2.20468	0.45358								20485.6	957.7	279.5	123.6	21.3904	2.26133	0.442218	932078
12937.2	686.8	227.3	96.2	18.8369	2.36279	0.423229	17966.1	661.2	234.7	113.4	27.172	2.06966	0.48317								225509	2334.6	690	430.4	96.5943	1.60316	0.623768	36560.8	830.9	258	188.3	44.0014	1.37015	0.729845								414599	10343.2	1426.8	752.5	40.0842	1.89608	0.527404	1.38797e+06
327775	4318.9	852	607.2	75.8932	1.40316	0.712676	113348	1777.6	659.2	228.3	63.7645	2.88743	0.346329								112896	2167.2	684.5	224.8	52.0933	3.04493	0.328415	210864	4580.7	1455.6	240	46.033	6.065	0.16488								392086	4351.5	1463.1	364.5	90.1036	4.01399	0.249129	33858.8
63834.4	1564.7	477.3	187.4	40.7966	2.54696	0.392625	23299.2	1328.5	305.8	163.3	17.538	1.87263	0.534009								45787.2	1646.3	443.2	174.2	27.8122	2.5442	0.393051	534345	4631.5	1957	375.7	115.372	5.20894	0.191978								484218	5582.4	1436.7	477.3	86.7401	3.01006	0.33222	93936.8
60858.7	1500.3	354.9	245.8	40.5644	1.44386	0.692589	97171.1	1605.6	479.2	274.2	60.5201	1.74763	0.572204								944574	6711.6	1846.5	763.4	140.738	2.41878	0.413431	468462	4982.5	1902	332.5	94.0215	5.7203	0.174816								13281.9	654.1	199.7	98.2	20.3056	2.0336	0.491738	637239
125175	2317.2	595.7	312.9	54.0198	1.9038	0.525264	50141.9	1208	327.5	241.3	41.5082	1.35723	0.736794								1.24018e+06	7618.5	2964.7	591.4	162.786	5.01302	0.199481	58754.8	1181.1	398.5	197.4	49.7458	2.01874	0.495358								136829	1912.4	547.6	335.6	71.5485	1.6317	0.612856	2324963
							226690	2668.8	694.6	460.2	84.9409	1.50934	0.66254								909210	6585.4	2010.8	616.8	138.064	3.26005	0.306744	130705	2661.6	629.8	359.7	49.1078	1.7509	0.571134								1181677	23607.3	3099.9	1160.3	50.0556	2.67164	0.374302	41812.8
				47.1891	2.79671	0.464678	120435	2262.2	658.7	273.3	53.2379	2.41017	0.414908								34639.5	852.1	260.3	181.2	40.6519	1.43653	0.69612	187782	2006.8	579.2	433.9	93.573	1.33487	0.749137								892501	10351.3	3186.2	621.4	86.2211	5.12745	0.195029	99710.9
				24.4605	1.69467	0.208696	35075.5	1148.6	330.5	149.7	30.5376	2.20775	0.45295								23395.5	1421.7	392.2	113.5	16.456	3.45551	0.289393	1.41041e+06	16990.8	4359.8	1223.7	83.0102	3.5628	0.280678								104578	2871.9	999	151.9	36.414	6.5767	0.152052	19507.2
							187453	4375.4	1306.7	296.3	42.8424	4.41006	0.226754								447135	4808.1	1111.1	575.3	92.9962	1.93134	0.517775	32753.7	864.8	301.5	141.8	37.8743	2.12623	0.470315								58339.1	1466.1	347.6	232	39.792	1.49828	0.667434
							193420	3335.1	1316.7	246	57.9951	5.35244	0.186831															26366.2	1040.8	481.9	73.1	25.3326	6.59234	0.151691								10752.3	569.8	153.2	103.8	18.8703	1.47592	0.677546
							233656	3380.3	1261.2	282.8	69.1228	4.45969	0.224231												62.5711	2.65216	0.464552	50780.6	1112.4	446.7	150.3	45.6496	2.97206	0.336467								17068.8	1758.9	833	76.2	9.70425	10.9318	0.0914766
							112045	1936.5	636.2	252.9	57.8594	2.51562	0.397517												41.3558	1.44147	0.187935	384228	5594	2282.4	258.3	68.6858	8.83624	0.11317								23060.9	784.4	236.1	133.3	29.3994	1.77119	0.564591
							25088.7	1097.8	360	137.5	22.8536	2.61818	0.381944															2.40346e+06	24498.4	6787.9	956.2	98.107	7.09883	0.140868								1.63125e+06	15225.7	2247.1	1373.9	107.138	1.63556	0.61141
							51292.6	1281.8	401.9	172.3	40.0161	2.33256	0.428714															45031.9	1280.8	445.5	143	35.1592	3.11538	0.320988								523917	5977.4	1830	593.8	87.6496	3.08185	0.324481
							45442.5	1176.4	425.9	143.1	38.6284	2.97624	0.335994															23365.1	925.3	300.2	116.8	25.2514	2.57021	0.389074								110722	1885.2	667.9	224.9	58.7321	2.96976	0.336727
							52798.2	1298.5	383.9	181.4	40.6609	2.11632	0.472519															202722	2715.1	945.6	298.3	74.6646	3.16996	0.315461								26888.3	783.9	262.3	134.8	34.3007	1.94585	0.513915
							107695	1874.2	578.8	275	57.462	2.10473	0.475121															1.26531e+06	12730.5	3271.9	1062.3	99.3922	3.08002	0.324674								298301	6852.5	1250.6	634.8	43.5317	1.97007	0.507596
							530046	6187	2073.1	398.8	85.6709	5.19835	0.192369															134477	1901.1	697.6	267.5	70.7365	2.60785	0.383458								1.9641e+06	24702.7	4105	1725.3	79.5097	2.3793	0.420292
							36064	1569	362.8	152	22.9853	2.38684	0.418964															292700	4037.3	1334.3	321.7	72.4988	4.14765	0.2411								18741.7	691.7	281	87.8	27.0951	3.20046	0.312456
							120044	2294.6	973.3	164.2	52.316	5.92753	0.168704															319573	3842.1	1531.4	273.2	83.1765	5.60542	0.178399								1.80309e+06	18647.4	2934.8	1859.9	96.6939	1.57793	0.63374
							316642	3547.1	828.2	578.7	89.268	1.43114	0.698744															65253.9	1343	442.7	215.7	48.5882	2.05239	0.487237								33189.6	1323.2	542	85.9	25.0828	6.30966	0.158487
							70343.6	1801.1	726.4	174	39.0559	4.17471	0.239537															446567	4896.5	1996.2	300.2	91.2013	6.64957	0.150386								378956	5162	1240.6	623.8	73.4127	1.98878	0.502821
							13682.4	574.5	181.3	105.8	23.8162	1.71361	0.583563															245386	2864.5	1011.1	320.4	85.6647	3.15574	0.316883								17170.2	2183	700.3	156.1	7.86541	4.48623	0.222904
							15755.8	981.9	241.4	184.5	16.0462	1.3084	0.764292															91969.8	2051.2	531.2	276	44.8371	1.92464	0.519578								31450.8	1105.2	327.4	138.4	28.4571	2.36561	0.422724
							373577	3304.1	1057.8	489.8	113.065	2.15966	0.463036															15973.8	601.6	195.4	114.3	26.5522	1.70954	0.584954								2.66053e+06	14632	2834	1458.3	181.83	1.94336	0.514573
							77349.6	1233.3	383.8	266	62.7176	1.44286	0.693069															1.58454e+06	20374	4459.9	1527.6	77.7724	2.91955	0.342519								7877.9	549.6	153	96.9	14.3339	1.57895	0.633333
							24231.9	1101.6	235.4	165.2	21.997	1.42494	0.701784															11066.6	493.8	173.8	88.1	22.4111	1.97276	0.506904								255976	3582.2	1345.2	254.8	71.4579	5.27943	0.189414
							111685	2596.2	1037	150.5	43.0186	6.89037	0.14513															19993.9	626.2	205.2	131.6	31.9289	1.55927	0.641326								10032.4	481.9	171.9	82.9	20.8184	2.07358	0.482257
							183742	3430.7	1053.5	274.7	53.5582	3.83509	0.26075															48707.2	1066.5	398.1	159.1	45.6701	2.5022	0.399648								108207	2796.6	1109.5	146.1	38.6924	7.59411	0.131681
							1.26455e+06	13303.5	3013.4	684.1	95.0537	4.40491	0.227019															13241.4	760	220.8	110.5	17.4229	1.99819	0.500453								31967.9	1188.6	448.6	103.4	26.8954	4.33849	0.230495
							15010.6	832.6	304.5	91.3	18.0286	3.33516	0.299836															1.36986e+06	13648.7	4445.5	781.7	100.366	5.68696	0.175841								546815	12084.1	1921.3	774.9	45.2508	2.47942	0.403321
							35688.9	987.8	321.6	162.6	36.1297	1.97786	0.505597															12607.7	529	177.2	98	23.8331	1.80816	0.553047								215081	6649.7	944.4	611.8	32.3445	1.54364	0.647819
							35298.5	1040.6	323.1	156	33.9213	2.07115	0.482823															16054.9	569.3	201.2	105.7	28.2011	1.9035	0.525348								22787.1	667.7	199.6	149.4	34.1278	1.33601	0.748497
							515385	5930.7	1540.2	660.7	86.9012	2.33116	0.42897															130898	1922.3	549.6	352.7	68.0945	1.55826	0.641739								69745.4	1491.4	488	189.7	46.7651	2.57248	0.38873
							55839.9	1421.6	393.6	209.7	39.2796	1.87697	0.532774															132105	2247.6	754.9	248.5	58.7758	3.03783	0.329183								32114.9	1033.8	298.6	171.7	31.0649	1.73908	0.575017
							60427.8	1503.4	639.7	126.2	40.1941	5.06894	0.19728															163976	2204	605.4	363.9	74.3994	1.66364	0.60109								519217	6993.4	1469	530.4	74.2439	2.76961	0.361062
							1.08629e+06	11254.7	1886.8	1210.5	96.5188	1.55869	0.641562															20100.3	991.4	332.8	123	20.2747	2.70569	0.369591								437468	7275.3	1387	505.5	60.1305	2.74382	0.364456
							13824.4	675.3	174.4	115.3	20.4715	1.51258	0.661124															8760	491.8	163.2	75.7	17.8121	2.15588	0.463848								1.67207e+06	23332.1	3973.4	1307.9	71.6639	3.038	0.329164
							43658	911.9	267.2	218	47.8759	1.22569	0.815868															20652.9	699.9	180	161.2	29.5084	1.11663	0.895556								22280.2	2205.5	989.5	75.4	10.1021	13.1233	0.0762001
							15340.1	559.8	161	128.4	27.4028	1.25389	0.797516															634806	5814.3	1577	626.7	109.18	2.51636	0.3974								38365.5	1031.1	244.9	210.2	37.2083	1.16508	0.85831
							467322	6448.8	1614.2	691.8	72.4664	2.33333	0.428571															169897	2380.6	1000.9	222.3	71.3674	4.50247	0.2221								261619	3314	1094.2	324.9	78.9435	3.36781	0.296929
							33443.1	1017	289.9	156.5	32.8841	1.8524	0.539841																													13190.7	691.5	248.6	74.1	19.0755	3.35493	0.298069
							10331.5	769.2	280.1	58.3	13.4315	4.80446	0.20814																			55.6968	3.6413	0.390312								228297	3349.1	992.8	372.5	68.1668	2.66523	0.375201
							50263.5	1211.4	473.3	147.2	41.4921	3.21535	0.311008																			30.4545	2.65213	0.204816								936291	6364.7	2415.5	512.9	147.107	4.7095	0.212337
							287503	5963.9	1512.6	392.3	48.2073	3.85572	0.259355																													119548	2996.1	1252.6	136.5	39.9011	9.17656	0.108973
							48286.4	1714	565.5	137.1	28.1718	4.12473	0.24244																													695477	7439.7	1431.7	690.8	93.4818	2.07252	0.482503
							215269	3607.5	887.8	403.2	59.6726	2.20188	0.454156																													12881.5	1116.3	300.7	151.6	11.5395	1.98351	0.504157
							161112	2977.6	1070.6	208.6	54.108	5.13231	0.194844																													1.4135e+06	21061.1	2525	1444.7	67.1141	1.74777	0.572158
							277309	2584.3	769.6	498.3	107.305	1.54445	0.647479																													22133.2	1436.3	375.1	115.3	15.4099	3.25325	0.307385
							9606.6	487.7	151.9	92.3	19.6978	1.64572	0.607637																													81313.9	1798.9	590	190.2	45.202	3.102	0.322373
							68767	2009.2	651.6	154.1	34.2261	4.22842	0.236495																													233818	5811.2	1249	433.3	40.2357	2.88253	0.346918
							23284	890.9	317.6	103.3	26.1354	3.07454	0.325252																													273983	3818.7	1198.7	325.6	71.7477	3.68151	0.271628
							135288	2247	557.6	350.3	60.2084	1.59178	0.628228																													66303.2	1548.6	457.3	204.1	42.8149	2.24057	0.446315
							188877	2584.3	971.9	269.8	73.0864	3.6023	0.277601																													9626.9	544.3	181.4	73.8	17.6868	2.45799	0.406836
							501505	4192.5	1516.4	449.4	119.62	3.37428	0.29636																													155353	3261.5	841.7	280.2	47.6324	3.00393	0.332898
							24921.4	863	254.6	134	28.8776	1.9	0.526316																													302813	3207.9	1289.1	310.9	94.396	4.14635	0.241176
							22797.3	772.8	273.1	112	29.4996	2.43839	0.410106																													446897	6219	1977.3	596.9	71.8599	3.31262	0.301876
							74835.1	1522.4	446.4	274.2	49.156	1.62801	0.614247																													8506.5	944.9	246.2	100.8	9.00254	2.44246	0.409423
							699913	7969.7	1338.4	855.5	87.8217	1.56447	0.639196																													287954	5505.7	1347.8	374	52.3012	3.60374	0.277489
							16779.9	762.8	264.3	98.5	21.9978	2.68325	0.372683																													37671	971.5	330.4	157.9	38.7761	2.09246	0.477906
							904024	8680.7	2665.5	617.5	104.142	4.3166	0.231664																													15522.6	1938.3	1052.6	65.8	8.00836	15.997	0.0625119
							8983.1	575.5	244.8	57.2	15.6092	4.27972	0.23366																													16703.8	941.9	288.4	96.4	17.7342	2.9917	0.334258
							171408	2572.3	865.8	274.7	66.6361	3.1518	0.317279																													494342	4123.6	1379.4	485.7	119.881	2.84002	0.35211
							35405	933.4	329.7	141.1	37.9312	2.33664	0.427965
							74992.3	2561.8	1083.3	100.3	29.2733	10.8006	0.0925875																																	52.5829	3.76736	0.385246
							26021.4	983.5	310.7	160.3	26.458	1.93824	0.515932																																	36.3687	3.13847	0.192864
							40641.7	876.6	273.4	192.6	46.3629	1.41952	0.704462
							26102.6	773.8	250.9	140.1	33.733	1.79086	0.55839
							1.05872e+06	10182	2521	714.2	103.98	3.52982	0.2833
							111396	2288.5	774.8	218.9	48.6764	3.53952	0.282525
							61203.4	1609	539.7	154.2	38.0382	3.5	0.285714
							681475	4675.8	1475.6	631.1	145.745	2.33814	0.42769
							42299.4	1387.5	476.7	130.6	30.4861	3.65008	0.273967
							27613.3	854	322.4	116.3	32.3341	2.77214	0.360732
							45523.6	990.1	347.6	175.7	45.9788	1.97837	0.505466
											53.0776	3.19637	0.408305
											29.3241	1.90834	0.19514
[truncated: 48 more columns]

## Sheet: 300 degrees C
	Area	Perimetre	Length	Width	Area/Perimetre	Length/Width	Width/Length	Area	Perimetre	Length	Width	Area/Perimetre	Length/Width	Width/Length	Area	Perimetre	Length	Width	Area/Perimetre	Length/Width	Width/Length	Area	Perimetre	Length	Width	Area/Perimetre	Length/Width	Width/Length	Area	Perimetre	Length	Width	Area/Perimetre	Length/Width	Width/Length	Area	Perimetre	Length	Width	Area/Perimetre	Length/Width	Width/Length	Area	Perimetre	Length	Width	Area/Perimetre	Length/Width	Width/Length
Graminoids
	Agropyron repens S&L	Agropyron repens S&L	Agropyron repens S&L	Agropyron repens S&L	Agropyron repens S&L	Agropyron repens S&L	Agropyron repens S&L	Agropyron repens S&L	Agropyron cristatum	Agropyron cristatum	Agropyron cristatum	Agropyron cristatum	Agropyron cristatum	Agropyron cristatum	Agropyron sp.	Agropyron sp.	Agropyron sp.	Agropyron sp.	Agropyron sp.	Agropyron sp.	Agropyron sp.	Agropyron cristatum I	Agropyron cristatum I	Agropyron cristatum I	Agropyron cristatum I	Agropyron cristatum I	Agropyron cristatum I	Agropyron cristatum I	Agropyron cristatum I	Agropyron cristatum I	Bromus sterilis	Bromus sterilis	Bromus sterilis	Bromus sterilis	Bromus sterilis	Festuca sp.	Festuca sp.	Festuca sp.	Festuca sp.	Festuca sp.	Festuca sp.	Festuca sp.	Agropyron repens-I	Agropyron repens-I	Agropyron repens-I	Agropyron repens-I	Agropyron repens-I	Agropyron repens-I	Agropyron repens-I
	85856.1	1571.3	599.1	200.7	54.6402	2.98505	0.335003	209916	2417.8	766.1	367.4	86.8209	2.08519	0.479572	10539.4	512.4	199.6	68.9	20.5687	2.89695	0.34519	892288	7455.7	2962.4	415.6	119.679	7.12801	0.140292	558120	5766.5	2116.7	410.5	96.7867	5.15639	0.193934	27081	1247.1	546.5	74.5	21.7152	7.33557	0.136322	12344.1	488.1	170.1	95	25.2901	1.79053	0.558495
	394884	3207	1219.2	438.7	123.132	2.77912	0.359826	256869	2934.1	1097.6	316.8	87.546	3.46465	0.28863	1.22368e+06	14552.2	2844.5	1270.8	84.0892	2.23835	0.446757	608313	5427.2	1579.2	601.5	112.086	2.62544	0.380889	29468.7	1411.4	644.4	66.7	20.8791	9.66117	0.103507	699857	6867.1	1466.3	817.9	101.914	1.79276	0.557799	342005	3337.9	998.1	462.2	102.461	2.15945	0.46308
	141382	3619	1624.9	119.5	39.0665	13.5975	0.073543	589216	4406.6	1672.1	478	133.712	3.49812	0.285868	294464	2724.6	934.6	414.6	108.076	2.25422	0.443612	39303.4	1264	496.8	109.8	31.0945	4.52459	0.221014	25271.2	729.6	237.5	143.2	34.6371	1.65852	0.602947	327638	3264.8	1349.5	326	100.355	4.13957	0.241571	112410	3578.6	648.7	341.6	31.4117	1.899	0.526592
	74652.6	1368.4	485.4	203.6	54.5547	2.38409	0.419448	72178.7	3147.9	1366	190.5	22.9292	7.1706	0.139458	397505	4507	2014.7	258.8	88.1973	7.78478	0.128456	31805.7	1053.8	392.9	127.4	30.1819	3.08399	0.324256	497758	5606.2	1549.7	639.8	88.7871	2.42216	0.412854	7928.6	668	237.7	61	11.8692	3.89672	0.256626	250035	3299	1037.1	360.9	75.7912	2.87365	0.34799
	181288	2506.1	1019.7	236.6	72.3388	4.30981	0.232029	52367.3	1217.4	383.2	197.4	43.0157	1.94124	0.515136	231314	5167.4	1226.7	843.7	44.764	1.45395	0.68778	192973	4031.9	1689.1	170	47.8617	9.93588	0.100645	41011.8	1858.1	827.2	69.8	22.0719	11.851	0.084381	318954	4360.5	1821.4	234.4	73.1462	7.77048	0.128692	104233	2392.1	615.2	321.4	43.5738	1.91413	0.522432
	7736	579.2	236	54.5	13.3564	4.33028	0.230932	57675.1	1202.1	414.1	183.6	47.9786	2.25545	0.443371	31957.8	954.9	355.9	117.3	33.4672	3.0341	0.329587	19192.9	638.6	234.9	106.7	30.0547	2.2015	0.454236	194956	3567.7	1280.2	243.8	54.6446	5.25103	0.190439	866621	9207.3	2788.1	1035.8	94.1233	2.69174	0.371507	76660.1	2058.4	889.3	169.9	37.2426	5.23426	0.191049
	11887.8	655	203.2	91.9	18.1493	2.2111	0.452264	9566	488.6	164.4	79	19.5784	2.08101	0.480535	2.47858e+06	11712.9	5126.5	649	211.611	7.89908	0.126597	376802	4191.3	1277.8	510.9	89.9009	2.50108	0.399828	66435	1432.5	519.5	174.8	46.377	2.97197	0.336477	213140	4226.8	1470.4	231.6	50.4258	6.34888	0.157508	97845.3	2072.2	554.6	253.9	47.2181	2.18432	0.457807
	238051	3347	1465.3	215.9	71.1237	6.78694	0.147342	311852	5045.9	1295.2	478.9	61.803	2.70453	0.36975	134817	4207.5	868.1	572	32.042	1.51766	0.65891	13185.6	662.8	195.1	96.3	19.8938	2.02596	0.493593	439440	5560.9	2154.3	285.1	79.0231	7.5563	0.13234	77146.8	1619.2	584.9	174	47.645	3.36149	0.297487	272184	4150.9	1031	433.3	65.5722	2.37941	0.420272
	13535.4	913.1	396.5	46.3	14.8236	8.56371	0.116772	595634	4771.2	1919.2	424.2	124.839	4.52428	0.22103	1.09737e+06	10459	4045.4	440.4	104.921	9.18574	0.108864	15492.2	515.5	177.6	113.2	30.0528	1.5689	0.637387	698372	6438.5	2209.9	490.2	108.468	4.50816	0.22182	232226	2973.6	810.8	408	78.0959	1.98725	0.503207	170790	2855.5	900.4	373.4	59.8107	2.41136	0.414705
	41032.1	1154.2	439.4	125.7	35.5503	3.49562	0.286072	54795.6	1083.4	336.3	214.5	50.5774	1.56783	0.637823	64579.6	1638	687.2	131.3	39.4259	5.23382	0.191065	167423	2981.8	989.7	398.5	56.1484	2.48356	0.402647	225104	3215.8	1335.4	235	69.9992	5.68255	0.175977	65411	1725.4	475.9	257.2	37.9106	1.85031	0.54045	462004	5019.7	1657.2	382.6	92.0381	4.33142	0.230871
	329514	5695.3	2100.5	224.4	57.8571	9.36052	0.106832	531252	4006.4	1585.9	441.5	132.601	3.59207	0.278391	7609.2	555.3	222.6	48.8	13.7029	4.56148	0.219227	130761	2253.2	855.5	207.8	58.0336	4.11694	0.242899	24510.8	1158.7	413.7	92	21.1537	4.49674	0.222383	14767.3	901.8	380.3	65	16.3754	5.85077	0.170918	630172	4852.8	1343	656.7	129.857	2.04507	0.48898
	155171	2247.8	821.5	255.7	69.0322	3.21275	0.31126	264154	2526.3	799.8	431.1	104.561	1.85525	0.53901	26695.7	1327.7	529.9	78	20.1067	6.79359	0.147198	188852	2373.5	886	313.9	79.5669	2.82255	0.354289	33356.9	1864	832	56.4	17.8953	14.7518	0.0677885	833087	6906.6	2193	521.8	120.622	4.20276	0.237939	293592	3411.3	1085.9	432.9	86.0645	2.50843	0.398655
	332571	6729.3	1656.4	279	49.4213	5.93692	0.168438	8780.3	483.9	179.3	66.1	18.1449	2.71256	0.368656	378469	5462.2	1130.8	543.2	69.2888	2.08174	0.480368	40484.6	1721	704.7	100.7	23.5239	6.99801	0.142898	27364.9	897.6	345.5	106.4	30.4867	3.24718	0.307959	485080	3248.6	921.3	700.6	149.32	1.31502	0.760447	276087	3424.1	740.9	630.8	80.6305	1.17454	0.851397
	383437	4073.5	1330.8	404.6	94.1297	3.28917	0.304028	62927	2178.1	1128.8	83.3	28.8908	13.551	0.0737952	48266.2	1558.7	614.6	117.8	30.9657	5.21732	0.191669	160311	2260.7	657	368.6	70.9121	1.78242	0.561035	116354	1876.9	742.9	209.3	61.9926	3.54945	0.281734	636981	5656.1	2025.1	427	112.618	4.74262	0.210854	9733.3	429.5	152.3	86.1	22.6619	1.76887	0.565332
	95128.1	1492.2	577	213.7	63.7502	2.70005	0.370364	327699	3024.8	963.7	446	108.337	2.16076	0.4628	19157.4	821.3	300.9	87.9	23.3257	3.42321	0.292124	947403	10680.2	3393	598	88.7065	5.67391	0.176245	161472	2445.8	1006.1	212.1	66.0201	4.74352	0.210814	1.04899e+06	15410.4	3224.7	895.4	68.0705	3.60141	0.277669	157680	5204.6	2446.1	177.6	30.2963	13.7731	0.0726054
	57041.4	1385	557.1	137.7	41.1851	4.04575	0.247173	276746	3090.4	1014.5	377.8	89.5502	2.68528	0.3724	159698	3523.4	1223.5	230.9	45.3249	5.29883	0.188721	469096	6810.7	2450.1	354.6	68.8763	6.90948	0.144729	211543	2837.2	1141.5	273.3	74.5604	4.17673	0.239422	8090.8	561	193.3	60.3	14.4221	3.20564	0.31195	127755	2328	597.7	342.1	54.8776	1.74715	0.572361
	50050.6	1137.3	400.1	182.9	44.0083	2.18753	0.457136	629782	4461	1577.1	537.3	141.175	2.93523	0.340689	252215	5434.8	1427.8	338.3	46.4074	4.22051	0.236938	254851	2429.5	681.2	533.5	104.899	1.27685	0.783177	19238.5	920.4	436	62.8	20.9023	6.94268	0.144037	328941	5751.2	1014.4	501.1	57.1952	2.02435	0.493987	219395	3279.6	1417.6	225.7	66.897	6.2809	0.159213
	401551	4452.2	1489.3	534.3	90.1915	2.78739	0.358759	13773.7	581.8	225.5	82.8	23.6743	2.72343	0.367184	50785.7	2681.1	835.2	215.9	18.9421	3.86846	0.258501	213054	3727.8	1367.1	259	57.1526	5.27838	0.189452	15978.9	653.5	246.2	86.6	24.4513	2.84296	0.351747	12364.4	544.8	211.3	77.9	22.6953	2.71245	0.36867	1.11093e+06	7911.6	2142.4	684.4	140.418	3.13033	0.319455
	457933	3213.7	1072.8	560.5	142.494	1.91401	0.522465	10564.7	1027.5	447	37.1	10.2819	12.0485	0.0829978	27202.6	1463.8	566.6	67.4	18.5835	8.40653	0.118955	367884	4181.3	1433.7	340.9	87.9833	4.20563	0.237776	29220.3	855.3	282	140.8	34.1638	2.00284	0.499291	18442.6	735.4	246.1	103.9	25.0783	2.36862	0.422186	76558.7	1357	388.5	265.4	56.4176	1.46383	0.68314
	396010	3267.1	1184.2	439.9	121.211	2.69198	0.371474	350126	4335.9	1672.9	337.3	80.7505	4.95968	0.201626	59449.4	1716.8	603.9	166.2	34.628	3.63357	0.275211	17433.8	736.2	273.7	88.6	23.6808	3.08916	0.323712	23689.5	942.2	375.5	91.4	25.1428	4.10832	0.243409	12247.8	642.1	245.5	71	19.0746	3.45775	0.289206	117880	1839.8	728.8	229.1	64.0721	3.18114	0.314352
	805616	8142.9	1797.9	999.1	98.9347	1.79952	0.555704	485115	4111.9	1647.5	394	117.978	4.18147	0.23915	139136	1875.1	628.2	294.1	74.2019	2.13601	0.468163	14660.8	971.4	364.9	75.1	15.0924	4.85885	0.20581	266252	3197.8	1148.3	318	83.2611	3.61101	0.276931	633194	5945.5	2195.4	385.4	106.5	5.69642	0.175549	139562	2465.7	567.6	328.4	56.6013	1.72838	0.578576
	159895	2364.9	824.1	290.7	67.6119	2.83488	0.352748	10088.2	793	161.7	103.9	12.7216	1.5563	0.642548	255003	4710.5	1098.5	388.9	54.135	2.82463	0.354028	92334.8	2565.1	1161.3	121.8	35.9966	9.53448	0.104882	23213	899.8	323.1	95.6	25.798	3.37971	0.295884	365649	3866.8	1336.6	376	94.5611	3.55479	0.281311	56047.8	1755.7	586.4	143.7	31.9233	4.08072	0.245055
	263981	3276.6	1034.6	358.1	80.5656	2.88914	0.346124	443029	4799	1717.4	361.2	92.3169	4.75471	0.210318	100071	2017.1	723.9	189.6	49.6112	3.81804	0.261915	84142.6	1379.5	511.2	213.9	60.995	2.3899	0.418427	915972	12794.6	3325.2	1987.4	71.5905	1.67314	0.597678	336302	4106.5	1320.8	349	81.895	3.78453	0.264234	442669	3988.1	1357.1	422.4	110.997	3.21283	0.311252
	1204459	10838.1	3229.7	1717	111.132	1.88101	0.531628	300238	5886	1517.3	468.3	51.0088	3.24002	0.30864	29316.6	965.4	347	113.9	30.3673	3.04653	0.328242	341184	5364.7	2284.7	224.8	63.5979	10.1633	0.0983937	50770.5	1608.7	561	155.1	31.56	3.61702	0.276471	47804.8	1191	466.6	136.9	40.1384	3.40833	0.293399	14513.8	515.2	153.8	126.9	28.1712	1.21198	0.825098
	120095	1584.6	531.5	303.3	75.7889	1.75239	0.570649	648154	4335.3	1641.6	526.7	149.506	3.11676	0.320846	237311	4047.6	1207.3	408.7	58.63	2.954	0.338524	158816	2744.1	1183.7	183	57.8753	6.46831	0.1546	8273.3	468.9	187.1	57.7	17.6441	3.24263	0.308391	160179	2122.7	671.8	317.6	75.4601	2.11524	0.47276	94580.6	2429.3	1053	119	38.9333	8.84874	0.11301
	67748	1808	613.1	177.9	37.4712	3.44632	0.290165	218934	4099.6	1162.2	448.9	53.4037	2.589	0.38625	10311.2	531.9	164.8	94.5	19.3856	1.74392	0.573422	12658.4	534.8	166.6	104	23.6694	1.60192	0.62425	1.04952e+06	6335	2479.1	562.8	165.67	4.40494	0.227018	29955.3	912.7	304	160.3	32.8205	1.89644	0.527303	480213	4216.5	1022.9	668.6	113.889	1.52991	0.653632
	266120	2754.7	1018.6	351.2	96.6059	2.90034	0.344787	1.04478e+06	8749.7	2661.4	616.2	119.407	4.31905	0.231532	9079.4	602.5	225.6	67.9	15.0695	3.32253	0.300975	388583	4072.1	1261	516.1	95.4257	2.44332	0.409278	1025234	11894.4	4584.2	559.1	86.1947	8.19925	0.121962	288360	3791.2	1043.7	415.4	76.0604	2.51252	0.398007	342948	3754	916.9	504	91.3553	1.81925	0.549678
	97556.4	1857	786.2	163.8	52.5344	4.79976	0.208344	145447	2647	880.2	334.7	54.948	2.62982	0.380254	1.05031e+06	10019	2938.2	595.4	104.832	4.93483	0.202641	43825.3	1209.7	352	199.6	36.2282	1.76353	0.567045	25337.1	765	264	125.7	33.1204	2.10024	0.476136	659332	6610.3	1532.9	694.6	99.7431	2.20688	0.453128	127801	1519.9	478.4	349.1	84.0849	1.37038	0.729724
	111457	1645.8	606.2	249.1	67.722	2.43356	0.41092	285587	4792	1118.2	658	59.5966	1.69939	0.588446	198560	2862	931.2	287.4	69.378	3.24008	0.308634	261801	4920.9	1345.1	371.8	53.2019	3.61781	0.276411	594737	5272.8	1496	567.2	112.793	2.63752	0.379144	678170	8799.8	2961.5	727.6	77.0665	4.07023	0.245686	69142.1	1195.3	427.8	213.8	57.845	2.00094	0.499766
	8623.1	465.8	195	58	18.5125	3.36207	0.297436	14082.9	629.9	240.1	77.9	22.3574	3.08216	0.324448	7629.5	453.7	174.2	59	16.8162	2.95254	0.338691	16708.9	596.4	207.3	106.1	28.0163	1.95382	0.511819	8232.8	486.3	200.7	54.1	16.9295	3.7098	0.269557	367930	7111.2	2110.8	304.9	51.7395	6.92293	0.144448	13854.8	539.1	208.4	88.6	25.6999	2.35214	0.425144
	174673	2660.8	1059.6	233.1	65.6467	4.54569	0.219989	17869.8	895.1	306.7	92.5	19.964	3.31568	0.301598	31729.6	1397.4	638.5	71.7	22.7062	8.90516	0.112294	28373.7	754.9	246.2	158.7	37.586	1.55135	0.644598	75590.5	1789.4	765.2	131.8	42.2435	5.80577	0.172243	986554	9663.3	2331.2	836.9	102.093	2.78552	0.359	56620.6	1634.5	366.9	230.2	34.6409	1.59383	0.627419
	315061	3120.6	1234.7	338	100.962	3.65296	0.273751	371661	3660.6	1065	471.1	101.53	2.26067	0.442347	141057	3476.9	1137.1	203.7	40.5698	5.58223	0.17914	106676	1601	547.9	274	66.631	1.99964	0.500091	114443	2076.1	871.8	177.7	55.1239	4.90602	0.203831	62845.9	1290.4	448.6	195.5	48.7027	2.29463	0.4358	285982	2750.1	1007.7	389.6	103.99	2.5865	0.386623
	291752	3804.6	998.2	456.9	76.6839	2.18472	0.457724	284340	3733.4	1039.6	431.2	76.1611	2.41095	0.414775	8536.9	444.3	179	67	19.2143	2.67164	0.374302	15882.6	574.7	208.4	101	27.6363	2.06337	0.484645	219664	4449.6	1651.1	515.4	49.3671	3.20353	0.312156	100025	2513.2	480.8	315.2	39.7999	1.52538	0.655574	430806	3201.8	1019.6	567.4	134.551	1.79697	0.556493
	120191	1761	687.6	229.9	68.2518	2.99087	0.334351	115036	2223.9	916.1	167.5	51.7271	5.46925	0.18284	21413.3	1006	244	138.4	21.2856	1.76301	0.567213	92405.8	2095.2	812.5	167.5	44.1036	4.85075	0.206154	12141.3	714.9	309.2	54.6	16.9832	5.663	0.176585	40509.9	887.4	274.1	198.6	45.6501	1.38016	0.724553	121880	2520.6	801.6	207.6	48.3534	3.86127	0.258982
	81136.4	1541.6	574.1	187.4	52.6313	3.0635	0.326424	472832	4414.3	1450.1	475.1	107.114	3.0522	0.327633	30016.2	1242	390.5	142.4	24.1676	2.74228	0.364661	18042.1	578.2	202.3	115.6	31.2039	1.75	0.571429	18554.2	823.7	358.8	69	22.5254	5.2	0.192308	9647.1	474.1	172.8	75.1	20.3482	2.30093	0.434606	192350	3445.5	642.5	506.1	55.8264	1.26951	0.787704
	406422	3316	1155.8	471.3	122.564	2.45237	0.40777	405926	6238.6	2541	299.5	65.0668	8.48414	0.117867	163003	4339.4	1694	169.1	37.5635	10.0177	0.0998229	130442	2335.6	785.1	222.9	55.8494	3.52221	0.283913	584360	5916.3	1930.3	464.3	98.7711	4.15744	0.240533	853349	10683.6	2610.9	1548	79.8747	1.68663	0.592899	372021	2792.8	869.3	571.9	133.207	1.52002	0.657886
	338152	4765.4	1446.9	539.1	70.9599	2.68392	0.37259	257300	2563.2	700.4	494.3	100.382	1.41695	0.70574	62298.4	1788.2	669.4	134.3	34.8386	4.98436	0.200627	517788	11853.3	3500.1	1229.4	43.683	2.847	0.351247	43435	1077.3	378.9	157.1	40.3184	2.41184	0.414621	82925.9	2477.9	609.8	214.8	33.4662	2.83892	0.352247	271555	2619.9	854.2	425.5	103.651	2.00752	0.498127
	158511	3151.4	979	348.5	50.2987	2.80918	0.355975	38679.8	1112.8	461.3	112.4	34.759	4.10409	0.243659	57999.5	4120.4	648.2	213.6	14.0762	3.03464	0.329528	124683	2042.8	763.4	249.3	61.0353	3.06217	0.326565	84766.2	1586.3	565.6	199.7	53.4364	2.83225	0.353076	97510.7	2531	588.8	313.6	38.5266	1.87755	0.532609	93622.5	1675.9	648.4	192.3	55.864	3.37181	0.296576
	862089	6429	1944.1	648.7	134.094	2.99692	0.333676	13966.3	596.8	200.3	94	23.402	2.13085	0.469296	39800.2	1165.3	495.5	107.8	34.1545	4.59647	0.217558	95498.2	5458.2	1938.3	301.3	17.4963	6.43312	0.155445	302600	3436.6	1266.9	320	88.0522	3.95906	0.252585	122483	1980.8	583.5	295	61.835	1.97797	0.50557	234578	2422.7	611.6	555.2	96.8252	1.10159	0.907783
	357016	5016.2	1415.3	560.4	71.1725	2.52552	0.395958	131283	3030.3	1309.4	181.5	43.3236	7.21433	0.138613	85856.1	2223.9	1070.4	121.5	38.6061	8.80988	0.113509	45543.9	1017.6	309.1	194.1	44.7562	1.59248	0.627952	157421	3283.4	857.7	371	47.9446	2.31186	0.432552	33473.5	961.7	374.3	117.4	34.8066	3.18825	0.313652	853395	7423.4	2172.8	623	114.96	3.48764	0.286727
	353959	3884.8	1417.8	334.8	91.1137	4.23477	0.23614	71540	1312.8	423.6	231.5	54.4942	1.82981	0.546506	12399.9	726.1	299	59.7	17.0774	5.00838	0.199666	15269.2	810.9	383.1	53.2	18.8299	7.20113	0.138867	366891	2910.1	902.6	540.9	126.075	1.6687	0.599269	124658	3060.1	758.5	239.4	40.7364	3.16834	0.315623	282054	2875.1	912	419.2	98.1022	2.17557	0.459649
	55241.7	1212.8	487	152.2	45.5489	3.19974	0.312526	504653	7644.7	2054.8	798.3	66.0134	2.57397	0.388505	140469	1951.4	719.8	258.1	71.9838	2.78884	0.358572	11345.4	792.7	340.6	48.6	14.3124	7.00823	0.142689	54673.9	1492.3	592.1	121.4	36.6373	4.87727	0.205033	8922.2	601.3	223.9	65.4	14.8382	3.42355	0.292095	247024	2551.7	908	354.3	96.8075	2.5628	0.390198
	40484.6	1483.7	599.4	91.1	27.2862	6.57958	0.151985	37843.4	1063.2	432.7	121.3	35.5939	3.56719	0.280333	58694	1331.5	475.7	166.5	44.0811	2.85706	0.350011	86023.4	2588.5	907.4	254	33.2329	3.57244	0.279921	7898.2	499.5	190.7	56.1	15.8122	3.39929	0.294179	317494	3467.8	1373	318.2	91.5549	4.3149	0.231755	118691	1658.6	513.1	312.5	71.5609	1.64192	0.609043
	224921	2891.7	1278.1	232.7	77.7816	5.49248	0.182067	197059	3014.4	1303.4	198.9	65.3727	6.55304	0.152601	356950	3477.4	1021.8	471.5	102.648	2.16713	0.461441	89217.1	2604.9	1088.5	150.4	34.2497	7.23737	0.138172	156296	3474.7	1578.3	133.5	44.9811	11.8225	0.0845847	236368	2850.2	1101.6	282.2	82.9303	3.90361	0.256173	197247	2508.1	837.2	304.6	78.644	2.74852	0.363832
	27157	1002.9	389.4	104.1	27.0785	3.74063	0.267334	118539	3157	774.3	325.2	37.5479	2.381	0.419992	51525.8	1638.3	477.4	188.1	31.4508	2.53801	0.394009	12998.1	695.5	271.6	70.6	18.6889	3.84703	0.259941	164554	3897.1	1844.8	117.3	42.2248	15.7272	0.0635841	19978.7	692.1	285	91.6	28.8668	3.11135	0.321404	45442.5	1651.1	604.4	107.6	27.5226	5.6171	0.178028
	289318	5544.7	2541.6	157	52.1792	16.1885	0.0617721	1.11531e+06	13288.2	3602.1	949.2	83.9322	3.79488	0.263513	128860	2094.5	763.4	240.6	61.5231	3.1729	0.315169	10661	548.8	206.6	69.8	19.426	2.95989	0.337851	10098.3	523.1	202.3	66.5	19.3047	3.04211	0.32872	42375.5	1063.5	408.8	134.2	39.8453	3.0462	0.328278	306615	6010.7	1324.7	457.7	51.0115	2.89425	0.345512
	224586	3616.9	1492.7	200.9	62.0936	7.43006	0.134588	540109	8582.8	2836.7	410.5	62.9292	6.91035	0.14471	9332.8	464	185.1	66.8	20.1138	2.77096	0.360886	94347.4	2113.2	958	133.9	44.6467	7.15459	0.13977	383873	3110.7	1029.8	490.6	123.404	2.09906	0.476403	8197.3	574.3	206.6	55.8	14.2736	3.70251	0.270087	255338	3957.6	1613.7	281	64.5183	5.7427	0.174134
	259829	4741	1811	349.8	54.8047	5.17724	0.193153	8673.8	546.2	226.3	52.1	15.8803	4.34357	0.230225	19552.8	914.6	361.7	82.5	21.3785	4.38424	0.22809	42527.6	1679.4	735.9	80.3	25.3231	9.16438	0.109118	237752	2927.9	1066.8	298.3	81.2022	3.57627	0.279621	155024	2354.7	886	230.7	65.8358	3.84049	0.260384	252311	4317.8	1269.6	275.3	58.4351	4.6117	0.21684
	245904	4583.9	1928.4	190.2	53.645	10.1388	0.098631	548924	6109.5	1522.3	556.7	89.8477	2.73451	0.365697	94874.6	1688.9	714.6	177.3	56.1754	4.03046	0.248111	215603	3002.3	928.9	345.6	71.8127	2.68779	0.372053	225737	5099.4	1929.6	216.2	44.2674	8.92507	0.112044	65755.7	1648	536.2	177.6	39.9003	3.01914	0.33122	20282.8	753.8	235.5	118.4	26.9074	1.98902	0.50276
	39810.3	1610.8	662.2	85.7	24.7146	7.72695	0.129417	523826	4627.7	1510.8	473.2	113.193	3.19273	0.313212	194018	2534.5	933.4	272.4	76.5507	3.42658	0.291836	179585	4165.5	1065.8	392.3	43.1125	2.7168	0.36808	64493.5	2367.9	979	91.6	27.2366	10.6878	0.0935649	178059	3504.6	1492.9	176.5	50.8073	8.45836	0.118226	271727	5300.6	1765.3	310.1	51.2635	5.69268	0.175664
	8557.2	570.1	248.6	52.9	15.01	4.69943	0.212792	10934.8	661.7	273.9	52.9	16.5253	5.17769	0.193136	79808.2	1727.6	668.3	156.7	46.196	4.26484	0.234476	27222.9	1427.9	503.9	75.9	19.065	6.639	0.150625	26822.4	1667.8	787	98.1	16.0825	8.02243	0.124651	8552.1	901.4	161.4	125.5	9.48757	1.28606	0.777571	49259.8	1237	455.3	145.8	39.822	3.12277	0.320228
	107589	4781.5	2237.3	101.3	22.5011	22.0859	0.0452778	416110	4374.5	1352.6	418.3	95.1217	3.23356	0.309256	1.27963e+06	14389.6	4790.8	436.9	88.9273	10.9654	0.0911956	33012.2	1012	299.7	163.8	32.6208	1.82967	0.546547	147663	3163	1343.5	157.9	46.6844	8.50855	0.117529	211472	3573	1407.3	199.8	59.1861	7.04354	0.141974	316272	3551	1407.9	313.2	89.0657	4.49521	0.222459
	23233.3	871.9	291.5	112.9	26.6467	2.58193	0.387307	197146	3303	1313.4	231.5	59.6868	5.67343	0.17626	155323	2228.8	825.5	255.2	69.6889	3.23472	0.309146	16343.9	635.8	213.3	101.3	25.706	2.10563	0.474918	12541.8	747	332.9	51.5	16.7896	6.46408	0.154701	347069	4909	1418.5	482.9	70.7006	2.93746	0.34043	124627	2157.9	996.2	165.4	57.7539	6.02297	0.166031
	8111.1	556.6	240.1	49.3	14.5726	4.87018	0.205331	459910	4924.6	1216.2	571.3	93.3903	2.12883	0.469742	16490.9	1022.6	416.7	67.6	16.1264	6.1642	0.162227	11294.7	590.9	217.5	73.6	19.1144	2.95516	0.338391	114443	2864	1251.8	132.2	39.959	9.46899	0.105608	556174	6215.6	2202.7	454.4	89.4803	4.84749	0.206292	12399.9	682.7	282	60.1	18.163	4.69218	0.213121
	85146.4	5166.9	2265.6	117.3	16.4792	19.3146	0.0517744	23988.6	816.4	339.6	94.9	29.3834	3.5785	0.279446	25149.5	771.7	204	166.8	32.5897	1.22302	0.817647	106970	1621.6	524.1	274.6	65.9659	1.90859	0.523946	96801	1641.1	633.4	205.1	58.9854	3.08825	0.323808	476401	4524.7	1123.4	607.1	105.289	1.85044	0.540413	27304	871.1	262.7	143	31.3443	1.83706	0.544347
	555444	10328.5	2260.2	1287	53.7778	1.75618	0.569419	409449	4485.6	1004.4	583.4	91.2807	1.72163	0.580844	21266.3	909.1	363.3	83.9	23.3927	4.33015	0.230939	16911.7	637.7	178.9	133.1	26.5198	1.3441	0.743991	105267	3396.7	671.3	560.9	30.991	1.19683	0.835543	34822	1159.2	375.2	129.4	30.0397	2.89954	0.344883	9479.9	481.5	158	83.4	19.6883	1.89448	0.527848
	9510.3	486.9	156.3	84.4	19.5323	1.8519	0.539987	381800	5954.2	1831.7	671.5	64.1228	2.72777	0.366599	203847	3698.9	1086.5	358.9	55.1103	3.02731	0.330327	185562	3415.8	1100.9	338.6	54.3246	3.25133	0.307567	10164.2	477	173.6	79.6	21.3086	2.1809	0.458525	103924	1696.5	480.1	285.2	61.2576	1.68338	0.594043	121383	2166	742.8	240.1	56.04	3.09371	0.323236
	75458.7	3898	1934.9	58.9	19.3583	32.8506	0.0304408	11583.7	648.8	194.1	98.1	17.854	1.97859	0.50541	224510	2933.1	1272.3	234.8	76.5437	5.41865	0.184548	49153.3	1858.3	712.2	118	26.4507	6.03559	0.165684	83950	1918	762	164.6	43.7696	4.6294	0.21601	280786	3104.8	813.6	640.5	90.4362	1.27026	0.787242	22239.6	701.8	235	131.7	31.6894	1.78436	0.560426
	565709	4834.2	1908.2	388.9	117.022	4.90666	0.203805	17048.5	575.3	194.4	116.2	29.6341	1.67298	0.597737	512414	5216	1857.7	370.8	98.2389	5.00998	0.199602	47972.1	1360	544.7	127.4	35.2736	4.27551	0.23389	8876.6	494.5	199.4	68.5	17.9507	2.91095	0.343531	564852	5930.6	1915.6	448.6	95.2437	4.27017	0.234183	154831	2981.4	1123.5	201.6	51.9323	5.57292	0.179439
	28241.9	976.6	347.9	127.6	28.9186	2.72649	0.366772	188031	2105.7	717.9	354.9	89.2961	2.02282	0.494359	9738.4	545.7	184.2	75.4	17.8457	2.44297	0.409338	8298.7	537.5	239.7	48.5	15.4394	4.94227	0.202336	16065.1	536.8	160.2	133.4	29.9275	1.2009	0.832709	23268.7	1274.4	372.7	93.5	18.2586	3.9861	0.250872	445198	4990.8	1246.1	533.7	89.2038	2.33483	0.428296
	7659.9	549.2	233.2	46.4	13.9474	5.02586	0.198971	697216	7803.2	1692.3	879.2	89.35	1.92482	0.51953	7710.6	660.2	153.3	100.4	11.6792	1.52689	0.654925	10732	546.1	162.7	95.9	19.6521	1.69656	0.589428	48261.1	1005.9	322.8	210.2	47.978	1.53568	0.651177	9317.6	791.8	194.4	90.1	11.7676	2.1576	0.463477	175910	2138.8	851.1	282.5	82.2469	3.01274	0.331923
	12151.5	647.7	252.2	68.8	18.761	3.6657	0.272799	9064.2	699.2	253.1	77	12.9637	3.28701	0.304228	66353.9	2551.6	922.5	163.8	26.0048	5.63187	0.177561	23319.4	1051.4	380.4	93.3	22.1794	4.07717	0.245268	143577	3250.7	1210.9	362.7	44.168	3.33857	0.299529	426584	7038.5	2663	581.5	60.6072	4.57954	0.218363	33098.4	1783.1	730	94.6	18.5623	7.7167	0.129589
	15355.3	843.3	376.8	55.2	18.2086	6.82609	0.146497	163809	3317.3	1067.7	243.9	49.3802	4.37761	0.228435	28165.8	719	248.1	148.7	39.1736	1.66846	0.599355	16855.9	647.9	166.5	151.4	26.0162	1.09974	0.909309	143450	1810.3	570.2	335.3	79.241	1.70057	0.588039	338522	7051	1171.5	454.1	48.0105	2.57983	0.387623	24221.8	990.6	296.4	117.1	24.4516	2.53117	0.395074
	101769	2762.8	1028.5	359.5	36.8355	2.86092	0.349538	12318.7	672	233.3	78.4	18.3314	2.97577	0.336048	855230	7536.2	1704	810.1	113.483	2.10344	0.475411	159044	2288.5	843.8	267	69.4969	3.1603	0.316426	75996	1452	481.2	220.7	52.3388	2.18034	0.458645	75935.2	1444.2	587.1	167.9	52.5794	3.49672	0.285982	108592	1729	600.8	250.3	62.8065	2.40032	0.416611
	483143	4961.9	1780.6	374.5	97.3706	4.75461	0.210322	15254	652.6	245.1	83.4	23.3742	2.93885	0.340269	211994	2828.1	701.6	438.6	74.9599	1.59964	0.625143	10600.2	498.8	166.3	88	21.2514	1.88977	0.529164	356645	4237.1	1616.2	302.4	84.1721	5.34458	0.187106	560533	6711.1	1136.6	1028.3	83.5233	1.10532	0.904716	54288.7	1485.9	383.5	204.2	36.5359	1.87806	0.532464
	71905	1401.3	522.4	180.2	51.3131	2.899	0.344946	62612.7	1570.9	621.7	144.6	39.8579	4.29945	0.232588	201596	2827.7	689.6	418.3	71.2935	1.64858	0.606584	244454	3635.8	1128.9	327.5	67.2352	3.44702	0.290105	396501	6120.2	2485.2	219	64.7857	11.3479	0.0881217	103249	2503.2	1062.4	130.6	41.2469	8.13476	0.122929	65243.7	1430.7	507.1	190.4	45.6026	2.66334	0.375468
	225266	2240.7	729.3	410.3	100.534	1.77748	0.562594	349873	3649.1	1332.4	355.7	95.8792	3.74585	0.266962	153842	3911.4	1342.8	162.5	39.3318	8.26338	0.121016	53173.4	1190.8	434	164.9	44.6535	2.6319	0.379954	13778.7	530.3	174.7	106.3	25.9828	1.64346	0.608472	63297.1	1111.1	319.1	260	56.968	1.22731	0.814792	16825.5	550.1	185.1	122.7	30.5863	1.50856	0.662885
	12491.1	1289.8	386.4	67	9.68452	5.76716	0.173395	89156.3	2496.4	901.8	204.5	35.7139	4.40978	0.226769	227390	3848.5	923.9	456.5	59.0853	2.02388	0.494101	85957.5	1932.3	684.6	176.2	44.4846	3.88536	0.257377	182824	4089.1	1217	235.2	44.7102	5.17432	0.193262	12967.6	1021.8	283.9	97.6	12.6909	2.90881	0.343783	227506	2764.1	953.5	342.3	82.3076	2.78557	0.358993
	68564.2	3316	1328.5	74.5	20.6768	17.8322	0.0560783	36550.7	1201.9	391.8	141.5	30.4108	2.7689	0.361154	570216	11126.7	2998	776.8	51.2475	3.85942	0.259106	146644	2652.7	1086.5	195.2	55.281	5.56609	0.179659	54390.1	1740.3	426.1	221	31.2533	1.92805	0.518658	188203	6590.1	1458.5	509.3	28.5585	2.86373	0.349194	26259.7	782.9	263.3	141.4	33.5416	1.86209	0.53703
	80026.2	1375.3	491.7	218.4	58.1882	2.25137	0.444173	657466	10000.1	1931.9	1369.6	65.746	1.41056	0.708939	373415	5428	1482.7	343.6	68.7943	4.31519	0.231739	762049	9028.9	3328.7	460.2	84.4011	7.23316	0.138252	43936.9	1783.1	828.8	72.3	24.6407	11.4633	0.0872346	587589	5852.6	1894.2	461.7	100.398	4.10266	0.243744	37726.8	1150.2	313	173.4	32.8002	1.80507	0.553994
	110706	2119.1	626.5	248.9	52.2422	2.51708	0.397287	28028.9	1222.6	364.5	114.9	22.9257	3.17232	0.315226	13910.6	507.9	170.8	106.1	27.3885	1.6098	0.621194	214265	2802.4	827.1	381.6	76.4577	2.16745	0.461371	363656	4850.4	2056.1	239.9	74.9745	8.57065	0.116677	35714.2	1493.2	584.8	89.7	23.9179	6.51951	0.153386	22437.4	728.3	247.2	119.3	30.8079	2.07209	0.482605
	62612.7	1667.9	631.6	139.7	37.5398	4.52112	0.221184	32860.1	918.4	299.9	161.2	35.7797	1.86042	0.537513	22173.7	944.5	444.7	65.4	23.4767	6.79969	0.147065	71681.9	1246.5	377.1	253.6	57.5065	1.48699	0.672501	23618.5	984.8	402	84.2	23.983	4.77435	0.209453	129458	2089.5	749.1	232.6	61.9566	3.22055	0.310506	20044.6	1028	257	147.8	19.4986	1.73884	0.575097
	93419.7	1856.9	466.9	330.5	50.3095	1.41271	0.70786	181248	2155.3	708.8	342.7	84.094	2.06828	0.483493	423542	6013.7	1614	412	70.4295	3.91748	0.255266	359799	2887.7	851.8	561.5	124.597	1.51701	0.659192	19492	1334.3	291.6	153.3	14.6084	1.90215	0.52572	706092	6729.7	2332.6	426.1	104.922	5.4743	0.182672	808323	8495.3	1366.8	1010.5	95.1494	1.3526	0.739318
	236520	4944.7	1220	507.6	47.833	2.40347	0.416066	432033	5462.1	1831.1	385.2	79.0965	4.75363	0.210365	12653.3	758.6	284.3	63.9	16.6798	4.44914	0.224763	331481	3285.5	1139.6	385.2	100.892	2.95846	0.338013	26396.6	817	283.1	123	32.3092	2.30163	0.434475	86697.6	1879.3	803.1	140.4	46.1329	5.72009	0.174823	67712.5	1643.1	446.8	214.4	41.2102	2.08396	0.479857
	91341.2	3492.3	1284.7	363.6	26.155	3.53328	0.283023	252970	3013.2	712.4	470.9	83.954	1.51285	0.661005	250486	6344.1	902.5	848.7	39.4833	1.06339	0.940388	362663	3709.3	1350.2	378	97.7713	3.57196	0.279959	67185.3	1649.1	731.7	120.1	40.7406	6.09242	0.164138	35577.3	992.8	363.8	127.8	35.8353	2.84664	0.351292	26807.2	820.2	247	154.1	32.6837	1.60286	0.623887
	322239	5243.9	2188.2	228.4	61.4503	9.58056	0.104378	185101	4000.3	1002.4	466.9	46.2717	2.14693	0.465782	7913.4	400.7	157.9	66.4	19.7489	2.37801	0.420519	351115	3191.3	1263.9	366.4	110.022	3.44951	0.289896	169892	3713.1	1213.4	235.5	45.7548	5.15244	0.194083	222589	4957.9	1991.5	173	44.8958	11.5116	0.0868692	69897.5	1500.4	493.8	227.3	46.5859	2.17246	0.460308
	489561	5196.4	1733.9	413	94.2116	4.19831	0.238191	581678	7328.5	2163.3	456.7	79.372	4.73681	0.211113	35116	872	317.6	147.1	40.2706	2.15908	0.463161	16931.9	774.4	313.7	72.7	21.8645	4.31499	0.23175	21433.6	803.9	305.4	103.9	26.662	2.93936	0.34021	20034.4	816.9	337.6	80.1	24.5249	4.21473	0.237263	507330	4578.5	1305.1	651	110.807	2.00476	0.498812
	168093	2543.6	672.1	362.5	66.0845	1.85407	0.539354	221682	2493	794.3	371.5	88.9217	2.13809	0.467707	302737	3954.2	1488	272.3	76.5609	5.46456	0.182997	26832.6	716.9	246.4	141.3	37.4287	1.74381	0.573458	45609.8	1283.8	536.1	125.7	35.5272	4.26492	0.234471	215370	3638	910.4	350.7	59.2002	2.59595	0.385215	72508.2	1498.8	553	185.7	48.3775	2.97792	0.335805
	63621.5	1092.6	343.3	242.5	58.2295	1.41567	0.706379	478165	3349.3	1213.3	534.8	142.766	2.2687	0.440781	43435	1799.4	550.9	122.9	24.1386	4.48251	0.223089	13895.3	852.9	321.8	72	16.2918	4.46944	0.223741	89952.2	3231.6	1408.6	100.2	27.8352	14.0579	0.0711345	178297	5155.4	1576.4	170.6	34.5846	9.24033	0.108221	43713.8	916.8	272.8	207.9	47.6808	1.31217	0.762097
	107786	2171.6	742.4	289.1	49.6346	2.56797	0.389413	80796.8	2120.7	933.2	120.1	38.0991	7.77019	0.128697	636565	9639.6	2391.9	811.6	66.0364	2.94714	0.339312	439500	3532.1	1327.1	455.8	124.43	2.91158	0.343456	20835.4	883.8	402.8	69.1	23.5748	5.82923	0.171549	114630	2083.2	704	214.5	55.026	3.28205	0.304688	190880	3256	1127.7	294.7	58.624	3.8266	0.261328
	33681.4	980.4	316.2	153.8	34.3548	2.05592	0.486401	697109	6871.9	1893.4	608.7	101.443	3.11056	0.321485	228196	3523	1399.1	228.9	64.7732	6.11228	0.163605	11715.5	554.9	182.7	91.6	21.1128	1.99454	0.501368	266587	4370.8	1281.8	505.8	60.9927	2.5342	0.394601	8663.7	732.3	328.2	36.9	11.8308	8.89431	0.112431	134492	2151.4	807.8	219.5	62.5139	3.68018	0.271726
	327217	5362	1290.7	361.5	61.0252	3.5704	0.280081	118280	4270.1	1207.8	277	27.6996	4.36029	0.229343	280229	5568.9	1586	655.6	50.3203	2.41916	0.413367	544169	4487.7	1248.4	616.2	121.258	2.02597	0.493592	51074.6	1045.4	319.4	218	48.8565	1.46514	0.68253	186926	3197.9	1155	216.7	58.4526	5.32995	0.187619	402955	5997.5	1568.5	541.2	67.1871	2.89819	0.345043
	8349.4	561.3	249.3	44.5	14.8751	5.60225	0.1785	29002.3	828.5	300.7	129.2	35.0058	2.3274	0.429664	90550.4	2340.5	603.8	248.4	38.6885	2.43076	0.411395	26999.9	934.8	257.5	160.8	28.8831	1.60137	0.624466	50527.1	2003.6	791	99.4	25.2182	7.95775	0.125664	158369	3197.8	1425.5	147.6	49.5245	9.65786	0.103543	285247	3654.1	691.8	596	78.0623	1.16074	0.861521
	898751	6681	2167.2	564.9	134.523	3.83643	0.260659	26634.9	914.6	395.1	92.5	29.1219	4.27135	0.234118	11705.3	757.7	337.1	57.8	15.4485	5.83218	0.171462	85344.1	2024.9	748	166.7	42.1473	4.4871	0.222861	501662	10454.7	1857.5	1334.5	47.9843	1.39191	0.718439	195052	2328	865.2	292.9	83.7852	2.95391	0.338534	42532.6	1167	394.7	148.6	36.4461	2.65612	0.376488
	12171.7	798.7	242.5	91.1	15.2394	2.66191	0.37567	27765.3	1040.6	458.9	79.8	26.682	5.75063	0.173894	23344.8	692.5	260.8	117.4	33.7109	2.22147	0.450153	21514.7	687.3	242.8	118.1	31.3032	2.05588	0.486409	30102.4	1248.4	416.2	104.8	24.1128	3.97137	0.251802	240236	2912.8	1192.7	278.2	82.4759	4.2872	0.233252	16161.4	1211.5	494.5	53.6	13.34	9.22575	0.108392
	126234	1966.5	558	326.2	64.1923	1.71061	0.584588	697611	6767.4	2313.9	477.2	103.084	4.84891	0.206232	12825.7	776.1	298	65.8	16.5258	4.52888	0.220805	326817	3094.6	921.4	500	105.609	1.8428	0.542652	14032.2	704.7	286.7	69.6	19.9123	4.11925	0.242762	89840.7	1850.3	498.3	255	48.5547	1.95412	0.51174	21043.3	930.5	376.6	84.7	22.615	4.44628	0.224907
	33068	1380.4	590.9	81.1	23.9554	7.28607	0.137248	520505	6797.1	2135.5	362.4	76.5775	5.89266	0.169703	157396	2377.8	865	260.4	66.194	3.32181	0.30104	19573.1	725	274.2	95.5	26.9974	2.8712	0.348286	302484	3471.5	1302.8	333.6	87.1334	3.90528	0.256064	223192	2647.8	765.7	410.9	84.2935	1.86347	0.536633	47744	1005.2	287.4	225.3	47.497	1.27563	0.783925
	28140.5	1308.4	293.4	220	21.5076	1.33364	0.74983	411076	4479.2	1705.2	321.6	91.7744	5.30224	0.1886	25352.3	780.6	293.5	114.1	32.478	2.5723	0.388756	182419	2785.8	1178.3	220.3	65.4817	5.34862	0.186964	29397.7	1392.6	575.7	74.6	21.1099	7.71716	0.129581	20247.4	905.7	294.8	105.5	22.3555	2.79431	0.35787	380117	2934.5	924.4	557.2	129.534	1.65901	0.602769
	268772	4150.7	1432.7	278.8	64.7533	5.13881	0.194598	130315	2013.5	714.2	239.1	64.7207	2.98703	0.33478	14275.6	840.7	375.8	51.6	16.9806	7.28295	0.137307	352560	3488.9	1049.4	467.5	101.052	2.24471	0.445493	129185	2226.3	761.9	236.3	58.0266	3.22429	0.310146	55262	1867.8	548.6	163.9	29.5867	3.34716	0.29876	10356.9	856.6	382.2	41	12.0907	9.32195	0.107274
	449416	6661.9	1638.8	553.7	67.4607	2.95973	0.337869	158476	3380.6	960.9	333.5	46.878	2.88126	0.34707	130797	2088	704.2	252.2	62.6421	2.79223	0.358137	13717.9	551.6	207	87.3	24.8693	2.37113	0.421739	338776	4681.6	1754.3	346	72.3632	5.07023	0.19723	122478	1635.2	500.9	336.6	74.9007	1.48812	0.67199	100735	1489.3	446.5	306	67.6391	1.45915	0.68533
	69182.7	1606.2	539.4	199.2	43.0723	2.70783	0.369299	357933	5544.1	1270	557.8	64.5611	2.2768	0.439213	212293	2850.7	904.3	334.6	74.4705	2.70263	0.37001	9013.5	465.1	179.7	70.5	19.3797	2.54894	0.392321	18224.6	902.9	296.9	91.1	20.1845	3.25906	0.306837	34066.7	995.3	387.3	117.8	34.2276	3.28778	0.304157	47399.3	1221.8	376.6	187.2	38.7946	2.01175	0.497079
	27456.1	983.1	394.6	95.3	27.9281	4.14061	0.24151	474485	6401.7	963.2	923.8	74.1185	1.04265	0.959095	160534	3269.9	660.1	466.9	49.0945	1.41379	0.707317	537001	8809	2917.4	484.9	60.9605	6.0165	0.16621	43141	1670.2	583.6	101.6	25.8298	5.74409	0.174092	111533	1575.9	490.9	304.5	70.774	1.61215	0.620289	616186	5035.6	1172.4	740.9	122.366	1.5824	0.631952
	524419	3669.6	995.7	702	142.909	1.41838	0.705032	498063	3474.2	1259	561.6	143.36	2.24181	0.446068	87077.8	1684.2	650.3	177.8	51.7028	3.65748	0.273412	146953	2740.5	1108.4	232	53.6227	4.77759	0.209311	243855	3532	1066.1	346	69.0417	3.08121	0.324547	88127.2	1768.8	637.4	190.7	49.8232	3.34242	0.299184	37508.8	1690.8	800.2	76.3	22.1841	10.4875	0.0953512
	15806.5	692.2	206.4	124.1	22.8352	1.66317	0.60126	366024	6733.7	1710.5	861	54.357	1.98664	0.503362	170354	2857.8	761.7	355.7	59.61	2.14141	0.466982	146426	2371.1	616.8	329.7	61.7544	1.87079	0.534533	102149	2447.3	1136.2	121	41.7396	9.39008	0.106495	282545	9739.4	2049.3	301	29.0106	6.80831	0.146879	39947.2	1247.9	531.7	108.5	32.0115	4.90046	0.204062
	69000.2	1286.3	488.4	188.9	53.6424	2.58549	0.386773	378236	4260.8	1034.8	563.9	88.7712	1.83508	0.544936	58648.4	2235.2	926.4	94.9	26.2385	9.76185	0.10244	181435	3496.5	928	309.5	51.8906	2.99838	0.333513	200502	3683.5	1049.1	357.3	54.4323	2.93619	0.340578	104233	2193.7	821.7	176.2	47.5146	4.66345	0.214433	29098.6	1125.9	250	198.6	25.8447	1.25881	0.7944
	10230.1	568.2	171.8	90.3	18.0044	1.90255	0.525611	68817.7	1833.6	799	116.5	37.5315	6.85837	0.145807	24475.3	1151.8	415.2	86.3	21.2496	4.81112	0.207852	134883	2024.2	674.5	275.4	66.6351	2.44916	0.408302	17819.1	938.7	331.7	115	18.9827	2.88435	0.346699	181613	2808	901.6	364.3	64.6769	2.47488	0.404059	67114.4	1159.2	394.7	225.3	57.8972	1.75189	0.570813
	208344	4474.3	1100.8	436.2	46.5646	2.52361	0.396257	84497.5	1565.5	503	249.4	53.9748	2.01684	0.495825	10782.7	497.2	209.7	67.8	21.6868	3.09292	0.323319	144018	2783.8	1042	196.4	51.7342	5.3055	0.188484	40636.7	1202.6	444.1	136.7	33.7907	3.24872	0.307814	216987	3433.1	980.5	358.3	63.2045	2.73653	0.365426	782544	7962.4	2040.5	860.9	98.28	2.37019	0.421906
	24338.4	1008.6	300.2	118.6	24.1309	2.5312	0.39507	28566.3	972	418.8	89.9	29.3892	4.65851	0.214661	60169.2	1455.7	424.8	191.6	41.3335	2.21712	0.451036	92405.8	2275.5	659.1	265.7	40.609	2.48062	0.403125	36535.5	1541.6	475.1	116.5	23.6997	4.07811	0.245212	22630	633.3	206.3	144.2	35.7335	1.43065	0.698982	40788.7	990	335.4	176.4	41.2007	1.90136	0.525939
	73811.1	1586.9	656.2	147.2	46.5128	4.45788	0.224322	381455	6947.1	1824.9	781	54.9086	2.33662	0.427969	329544	3630.4	1232.9	368.5	90.7735	3.34573	0.298889	24419.5	1151	420.4	142.1	21.2159	2.95848	0.338011	225991	2875.5	1042.3	294.4	78.5918	3.54042	0.282452	259763	3276.9	624.2	560.6	79.271	1.11345	0.89811	59074.2	1321.3	425.4	186.4	44.7092	2.28219	0.438176
	903304	11768.4	2294.3	1620.3	76.7567	1.41597	0.706228	419354	3317.3	1144.7	490.2	126.414	2.33517	0.428234	102616	2723.5	864.4	176.7	37.6779	4.89191	0.204419	191240	2486.6	775.1	338.4	76.9081	2.29048	0.436589	233245	6435.3	2724.8	152.6	36.2446	17.8558	0.0560041	293460	3030.5	1037	385.9	96.8355	2.68722	0.372131	244124	3716	1121.8	294.6	65.6954	3.80788	0.262614
	354557	3798.9	1084.6	448.1	93.3314	2.42044	0.413148	88583.4	1639.1	658.6	177.4	54.0439	3.71251	0.269359	521605	5502.9	1497.8	607.1	94.7873	2.46714	0.405328	11304.9	494.2	153.3	104.3	22.8752	1.4698	0.680365	90383.1	2145.4	458.1	362.6	42.1288	1.26338	0.79153	9069.2	444.2	166.9	72.5	20.4169	2.30207	0.434392	324079	4236.6	1182.4	617.3	76.4951	1.91544	0.522074
	362480	3452.5	1333.6	370.2	104.991	3.60238	0.277594	483478	8204.6	2511.5	414.4	58.9277	6.06057	0.165001	17383.1	623.9	247.3	93.4	27.862	2.64775	0.377679	116775	2738.5	1213	133.6	42.6418	9.07934	0.11014	62176.7	1420.8	564.5	148.3	43.7618	3.80647	0.26271	462866	5163.7	1976.1	326.5	89.6383	6.05237	0.165224	56498.9	1322.6	423.8	209.2	42.7181	2.02581	0.493629
	805646	8381.9	2188.3	561.6	96.1173	3.89655	0.256638	75053.1	1468.3	541.2	184.6	51.1156	2.93174	0.341094	446800	4582.1	1784.8	351	97.51	5.0849	0.196661	8334.2	546	228.7	49.4	15.2641	4.62955	0.216003	20749.2	984.2	347.1	81.5	21.0823	4.2589	0.234803	35552	1546.6	465.5	108.8	22.9872	4.27849	0.233727	16921.8	1172.2	504	50.1	14.4359	10.0599	0.0994048
	123872	2337.5	869.2	195.5	52.9933	4.44604	0.224919	916165	10941.7	3315.4	484.6	83.7315	6.84152	0.146166	1594142	10860.5	3903.2	547.7	146.783	7.12653	0.140321	17966.1	829.6	233.3	120.8	21.6563	1.93129	0.517788	40910.4	948.5	293.7	184.3	43.1317	1.5936	0.627511	408653	5868.7	1124.9	939.5	69.6326	1.19734	0.835185	194276	2709.6	1087	253.9	71.6993	4.28121	0.233579
	62475.8	1611.1	501.7	170.9	38.7784	2.93563	0.340642	1.16167e+06	10211.5	3426.3	960	113.761	3.56906	0.280186	78611.8	1380.7	506.6	204.6	56.9362	2.47605	0.403869	12678.7	791.4	170.5	132.3	16.0206	1.28874	0.775953	767848	10981	2506.9	1443.4	69.9252	1.7368	0.575771	295366	6751.8	1080.6	649.1	43.7463	1.66477	0.600685	13510.1	880	213.2	109.3	15.3524	1.95059	0.512664
	902046	7248.8	2808.5	432.5	124.441	6.49364	0.153997	8972.9	657.6	203.2	86.5	13.6449	2.34913	0.425689	116694	2023.9	595.3	272.2	57.6577	2.18699	0.457248	12095.7	479.4	163	98.4	25.2309	1.6565	0.603681	315456	3424.4	1346	314	92.1201	4.28662	0.233284	223045	2372.2	764	393.2	94.0247	1.94303	0.51466	116704	2062.5	764.9	203.5	56.5836	3.75872	0.266048
	214539	2423.6	809.8	354.4	88.5207	2.28499	0.437639	116288	2294.8	917.2	201.6	50.6745	4.5496	0.219799	51480.2	1264.3	520.8	132.2	40.7183	3.93949	0.25384	49168.5	973.1	286.4	237.7	50.5277	1.20488	0.829958	122640	2758.7	977.7	175.7	44.4557	5.5646	0.179707	22143.3	876.8	284.6	108	25.2547	2.63519	0.37948	49711	1496	476.5	173	33.2293	2.75434	0.363064
	1.10273e+06	5994.2	2377.5	623.4	183.966	3.81376	0.262208	43115.6	1150.7	462.6	123.3	37.469	3.75182	0.266537	170632	5137.3	1112.4	480.4	33.2144	2.31557	0.431859	40712.7	1170.2	359	187.7	34.7912	1.91263	0.522841	138898	1985.9	652.9	301.7	69.9419	2.16407	0.462092	116379	1869.4	505.9	302.4	62.2548	1.67295	0.597747	253736	4451	1347.3	278.1	57.0064	4.84466	0.206413
	411299	7433.6	2357.2	268.9	55.3297	8.76608	0.114076	52260.9	2188.8	588.2	207.4	23.8765	2.83607	0.352601	12688.8	534.2	165.4	110.5	23.7529	1.49683	0.668077	19492	670.2	206.3	126.4	29.0839	1.63212	0.6127	327760	5991.6	1573.8	489.3	54.7032	3.21643	0.310904	14600	567.3	213.9	89.9	25.7359	2.37931	0.42029	408957	3001.3	896	590.3	136.26	1.51787	0.658817
	327111	3055.8	1030.6	422.9	107.046	2.43698	0.410343	518726	5434.3	2177.8	398.7	95.454	5.46225	0.183075	643875	6216.3	1774.6	533.7	103.578	3.32509	0.300744	23339.7	947.3	299.5	129.8	24.6381	2.3074	0.433389	62921.9	1674.4	649.6	162.2	37.5788	4.00493	0.249692	23370.1	756.1	205.8	152.7	30.9087	1.34774	0.741983	33032.5	877	269.4	166.6	37.6653	1.61705	0.618411
	8795.5	504.4	183.5	75.4	17.4375	2.43369	0.410899	49128	1167.5	320.5	228.7	42.0797	1.4014	0.713573	127385	2001.2	630.8	276.7	63.6543	2.27973	0.438649	26868	1168.2	501.1	74.3	22.9995	6.74428	0.148274	250349	3227.3	1306.8	261.2	77.5724	5.00306	0.199878	288999	6132.6	2114.4	376.4	47.125	5.61743	0.178017	78850.1	2368.2	583.8	225.2	33.2954	2.59236	0.385749
	865318	7912.6	1969.1	603.8	109.36	3.26118	0.306638	9895.6	920.2	315.3	95.2	10.7537	3.31197	0.301935	586372	5678.3	1210.3	715.4	103.265	1.69178	0.591093	40976.3	1198	339.3	193.4	34.2039	1.7544	0.569997	164275	2336.3	968.7	226.8	70.3143	4.27116	0.234128	15370.6	626.7	223	98.9	24.5262	2.2548	0.443498	12222.4	1217.7	299.9	80.2	10.0373	3.7394	0.267422
	742298	5871.8	2125.1	474	126.417	4.48333	0.223048	171956	3286	1266.1	221.5	52.3297	5.71603	0.174947	7817.1	415.5	162.8	63.1	18.8137	2.58003	0.387592	111512	2087.4	456.5	408.7	53.4217	1.11696	0.89529	10179.4	788.3	178.1	100.9	12.9131	1.76511	0.566536	54298.8	1304.8	493.6	149.5	41.6147	3.30167	0.302877	55180.9	1144	398.3	183.6	48.2351	2.16939	0.460959
	518999	4457.5	1709.3	405.2	116.433	4.21841	0.237056	67225.9	2160.2	876.2	225.9	31.1202	3.87871	0.257818	308567	3689.2	1308.9	316.7	83.6406	4.13293	0.241959	68736.6	1258.4	455.7	199.3	54.6222	2.2865	0.437349	229884	4526.1	1226.7	406.2	50.7907	3.01994	0.331132	99219.1	1764.2	668.6	204.8	56.2403	3.26465	0.306312	268163	3918.8	1051.1	459.3	68.43	2.28848	0.436971
	129828	2027.2	650.8	284.7	64.0432	2.28591	0.437462	57421.6	2182.3	779.4	123	26.3124	6.33659	0.157814	130148	2451.2	943.9	181.2	53.0955	5.20916	0.191969	28028.9	803.3	255.8	152	34.8922	1.68289	0.594214	268883	6108.1	1517.8	419.7	44.0208	3.61639	0.276519	300912	3803.5	1581.8	257.6	79.1145	6.14053	0.162852	10123.7	522.9	187.6	75.6	19.3607	2.48148	0.402985
	152960	3276.4	1507.9	135.2	46.6855	11.1531	0.0896611	33762.5	948.6	324.4	140.4	35.5919	2.31054	0.432799	139993	2065.7	578.6	330.9	67.7701	1.74856	0.571898	128693	1843.3	618.5	288.1	69.8166	2.14682	0.465804	383823	5633.6	1966.9	276.9	68.131	7.10329	0.14078	192847	2507.7	777.9	370.4	76.9018	2.10016	0.476154	224820	5473.2	995.9	535.2	41.0764	1.8608	0.537403
	98595.6	4203.5	2024	80.9	23.4556	25.0185	0.0399704	98600.7	2863.2	946.6	169.5	34.4372	5.58466	0.179062	251039	3053.5	1079.9	309.5	82.2135	3.48918	0.286601	19101.7	1165.7	497.3	69	16.3865	7.20725	0.138749	115862	2710.3	1201	129.9	42.7488	9.24557	0.10816	41777.3	1014	328.2	168.1	41.2005	1.95241	0.512188	34928.5	1109.5	269.4	202.4	31.4813	1.33103	0.751299
	315649	8478.3	3871.9	139.9	37.2302	27.6762	0.0361321	62044.9	1355.2	457.5	181.3	45.7828	2.52344	0.396284	39891.4	1075.3	427.9	123	37.0979	3.47886	0.28745	330528	2650	765.3	562.6	124.727	1.36029	0.735137	23228.2	760.6	278.3	112	30.5393	2.48482	0.402443	87138.7	3891.1	870.5	178.7	22.3944	4.87129	0.205284	276584	3081.3	938.3	404.6	89.762	2.31908	0.431205
	7862.7	798	307.9	72.6	9.85301	4.24105	0.235791	22630	868	316.6	97.9	26.0714	3.23391	0.309223	68614.9	1605.3	689.8	133.1	42.7427	5.18257	0.192954	103488	2008.4	535.6	348.2	51.5274	1.5382	0.650112	408764	9097.5	2409.9	1031.1	44.9315	2.33721	0.42786	37660.9	1617.2	384.4	166.3	23.2877	2.31149	0.432622	329103	3386.1	930.7	501.4	97.1924	1.8562	0.538734
	339638	5525.7	890.8	598.2	61.4651	1.48913	0.671531	166004	2170.1	812.4	278.7	76.496	2.91496	0.343058	243075	3747.2	1307.1	246.5	64.8684	5.30264	0.188585	68832.9	2372.3	1106.7	85.3	29.0153	12.9742	0.077076	13712.8	677.3	267	68.4	20.2463	3.90351	0.25618	309672	4006.9	1852.4	224.8	77.2847	8.24021	0.121356	47176.2	1719.1	682.5	108.4	27.4424	6.29613	0.158828
	676578	5052.6	1576.7	567.8	133.907	2.77686	0.360119	64488.4	1316.4	447.9	194.6	48.9885	2.30164	0.434472	31501.5	854.5	319.5	129.7	36.8654	2.46338	0.405947	184654	2202.8	761.8	320.1	83.8272	2.37988	0.420189	41954.7	1122.6	418.5	139.7	37.3728	2.99571	0.333811	123628	1927.2	663.6	255.7	64.1493	2.59523	0.385322	26898.5	782	263.3	140.8	34.3971	1.87003	0.534751
	251941	2442.5	847.7	390.3	103.149	2.17192	0.460422	48245.9	1099.1	407.3	157.6	43.8958	2.58439	0.386938	11710.4	653.3	301.8	51.3	17.925	5.88304	0.16998	134112	2985.9	1279.7	157.8	44.9151	8.10963	0.12331	18843.1	962.5	320.2	105.5	19.5772	3.03507	0.329482	112040	3935.6	1105.7	159.1	28.4683	6.94972	0.143891	12166.7	549.7	208.6	79.4	22.1333	2.6272	0.380633
	16703.8	583.6	205.5	111	28.622	1.85135	0.540146	535713	3986	1372.2	514.1	134.399	2.66913	0.374654	11806.7	615	269.9	59.6	19.1979	4.52852	0.220823	140895	2201.2	882.9	214.7	64.0083	4.11225	0.243176	20972.3	1986.3	959.9	101.9	10.5585	9.42002	0.106157	371215	5954.4	1627	665.7	62.343	2.44404	0.409158	524920	6383.4	2313	338.9	82.2321	6.82502	0.14652
	35060.3	2292.3	1026.6	49.1	15.2948	20.9084	0.0478278	409241	4089.2	1175.5	491.7	100.078	2.39069	0.41829	1.2318e+06	13823.5	2831.1	2002.9	89.109	1.4135	0.707464	19208.1	670	227	110.3	28.6688	2.05802	0.485903	40793.8	2146	425	148.2	19.0092	2.86775	0.348706	419704	5025.6	1512.4	611.3	83.5133	2.47407	0.404192	45756.8	970.7	281.9	213.9	47.1379	1.31791	0.75878
	102185	1705.1	482.3	288.2	59.9289	1.67349	0.597553	137392	3057.3	688.1	410.8	44.939	1.67502	0.597006	21864.5	1182.2	431.3	99.8	18.4948	4.32164	0.231393	11756	549.1	232.6	66.7	21.4096	3.48726	0.286758	107949	2325.2	998.9	144.8	46.4256	6.89848	0.144959	183346	2620.5	918.8	271.3	69.9662	3.38666	0.295276	258917	4165	1754.8	242.4	62.1649	7.23927	0.138135
	57381	1601.3	633.5	126.6	35.834	5.00395	0.199842	265466	8418.2	1621.5	305.8	31.5348	5.30249	0.188591	296329	4075.1	945.3	465.8	72.717	2.02941	0.492754	255753	3261.2	1239	285.7	78.4231	4.33672	0.230589	536661	7428.7	1633.9	1071	72.2416	1.52558	0.655487	35714.2	1101.2	316	166.7	32.4321	1.89562	0.527532	63981.4	1425.3	494.2	183.1	44.8898	2.69907	0.370498
	393586	4811.4	1161.9	563.3	81.8029	2.06267	0.484809	1.44502e+06	11735.5	1954.9	1589.2	123.133	1.23012	0.812932	15857.2	814.2	259.7	95.5	19.4758	2.71937	0.367732	117074	1586.9	495.4	316.5	73.7751	1.56524	0.638878	12435.3	567.6	215.6	87.1	21.9086	2.47532	0.403989	34872.7	1225.4	419.2	151	28.4582	2.77616	0.36021	29291.2	819.5	304.8	126.3	35.7428	2.4133	0.41437
	462303	5905.2	2058.1	364.5	78.2874	5.64636	0.177105	225195	3040.2	807.9	399.9	74.0724	2.02026	0.494987	278784	6253.9	1542.2	386.3	44.5776	3.99223	0.250486	95548.9	1586.2	572.9	234.1	60.2376	2.44724	0.408623	51987.1	1508.4	660.6	104.7	34.4651	6.30946	0.158492	15613.9	716.8	275	82	21.7828	3.35366	0.298182	287437	4223.6	958.7	525.5	68.0551	1.82436	0.548138
	34918.3	1295.3	556.3	93.1	26.9577	5.9753	0.167356	490149	3535.8	1251.4	532.7	138.625	2.34916	0.425683	91554.1	2283.6	915.1	142.1	40.092	6.43983	0.155284	35197.1	1099	330.8	197.5	32.0265	1.67494	0.597037	27329.4	1120	516.8	71.1	24.4013	7.26864	0.137577	85354.2	2918	786.5	270.7	29.2509	2.90543	0.344183	86276.8	1798.8	657.5	177	47.9635	3.71469	0.269202
	406858	3503.1	1218.4	466.7	116.142	2.61067	0.383043	79321.6	1681.1	677.7	161.1	47.1843	4.2067	0.237716	74982.1	1996.1	908.2	113.4	37.5643	8.00882	0.124862	68721.4	1451.8	423.8	256.6	47.3353	1.6516	0.605474	63185.5	1430.6	638.7	135.1	44.1671	4.72761	0.211523	102611	2002.5	792.1	181.1	51.2412	4.37383	0.228633	174586	2526.3	944.8	274.8	69.1076	3.43814	0.290855
	42071.3	1122.8	362.2	153.7	37.47	2.35654	0.424351	12491.1	683.7	287.5	58.7	18.2699	4.89779	0.204174	11543.1	521.3	166.2	93.5	22.1429	1.77754	0.562575	139248	1990.2	613.2	316.2	69.9666	1.93928	0.515656	535703	9178.7	2072.1	533.6	58.3637	3.88325	0.257517	89085.3	1927	766.7	168.7	46.23	4.54475	0.220034	95361.3	1656.4	501.2	283.1	57.5714	1.7704	0.564844
	147369	2375.5	777.6	255	62.0369	3.04941	0.327932	155018	3304.2	1382.1	161.7	46.9156	8.54731	0.116996	65887.5	1402.5	470.9	206.3	46.9786	2.2826	0.438097	166009	2188.4	699.3	329.8	75.8586	2.12038	0.471614	132835	2295.7	978.7	184.8	57.8624	5.296	0.188822	29620.8	989	376.4	106.5	29.9503	3.53427	0.282944	83032.4	1502.6	418.5	273.4	55.2592	1.53072	0.653286
	66622.6	1502.1	619.1	148.3	44.353	4.17465	0.239541	241990	2977.5	820.7	473.1	81.2728	1.73473	0.576459	40677.2	1674.9	607.9	91.6	24.2863	6.63646	0.150683	151404	1668.8	479.2	411.4	90.7263	1.1648	0.858514	19101.7	652.7	231	111	29.2657	2.08108	0.480519	288193	4120.7	1238.6	331.5	69.9378	3.73635	0.267641	70379.1	2268.6	891.6	110.6	31.0231	8.06148	0.124047
	11674.9	625.5	154.7	110.3	18.6649	1.40254	0.712993	14797.7	543.2	169.2	119.3	27.2417	1.41827	0.705083	67089	1269	445.6	200.7	52.8676	2.22023	0.450404	322254	3001.1	1171.2	359.4	107.379	3.25876	0.306865	403725	3434.9	986.8	575.9	117.536	1.71349	0.583604	77065.7	1721.2	510.7	205.7	44.7744	2.48274	0.40278	618918	4767.9	1654.7	548.8	129.809	3.01512	0.331661
	594316	7785.5	2094.5	1190.4	76.3363	1.75949	0.568346	454709	3461.7	1099.9	571.2	131.354	1.9256	0.51932	27157	938.1	367.6	101.2	28.9489	3.63241	0.275299	21053.4	678.8	242.8	118.9	31.0156	2.04205	0.489703	20500.8	823.6	346.3	80.5	24.8917	4.30186	0.232457	250704	3247.1	893.7	399.2	77.2086	2.23873	0.446682	15811.6	680.5	271.3	80.2	23.2353	3.38279	0.295614
	75778	1538.4	643.4	152.8	49.2577	4.21073	0.237488	125509	2287.1	574.8	294.6	54.877	1.95112	0.512526	121672	1929.8	845.1	190.6	63.0489	4.43389	0.225535	630821	4350.7	1304.8	643.6	144.993	2.02735	0.493256	1.06014e+06	11861.1	4263	427.9	89.3793	9.96261	0.100375	14072.8	616.9	221.1	88.3	22.8121	2.50396	0.399367	11259.2	514.9	169.6	92.8	21.8668	1.82759	0.54717
	729381	10244.4	2479.2	569.4	71.198	4.35406	0.229671	9900.6	695.5	227.4	70.1	14.2352	3.24394	0.308267	57487.5	1332.3	405.3	192.9	43.1491	2.10109	0.475944	156509	2142.2	685.6	331.8	73.0599	2.06631	0.483956	1.98644e+06	13406.3	3586.8	753.6	148.172	4.75955	0.210104	330660	3407	1125.7	406.9	97.053	2.76653	0.361464	399127	3448.4	986.2	542.2	115.743	1.81889	0.549787
	91229.7	1654.8	532.9	261.8	55.1303	2.03552	0.491274	171413	2832.6	1077.3	214.5	60.5144	5.02238	0.199109	133169	2085.7	750.3	238.3	63.8487	3.14855	0.317606	146654	1672.5	521.2	370.8	87.6854	1.40561	0.711435	115979	1876.5	574.1	280.6	61.8059	2.04597	0.488765	687558	9775.4	2988.3	344.5	70.3356	8.67431	0.115283	95609.7	2039.8	686.3	191.1	46.8721	3.59131	0.27845
	178226	2712.5	666.8	415	65.7056	1.60675	0.622376	15395.9	603.3	214.7	95.7	25.5195	2.24347	0.445738	10737.1	588.3	162.7	110	18.2511	1.47909	0.676091	14904.2	538.3	184.8	106.6	27.6875	1.73358	0.57684	132272	2610.5	1092.7	167	50.6692	6.54311	0.152832	243176	2893.4	895	380.5	84.0451	2.35217	0.42514	148459	2311.4	953.4	207	64.2289	4.6058	0.217118
	1.14866e+06	18517.9	4300.6	1549.6	62.03	2.7753	0.360322	1.50739e+06	14329.1	2874.7	1148.2	105.198	2.50366	0.399416	12136.2	728.8	269.2	61.3	16.6523	4.39152	0.227712	33412.7	815.6	247.8	180.9	40.967	1.36982	0.730024	53391.4	1259.6	388	216.2	42.3876	1.79463	0.557216	144190	3257.8	1234.6	159.8	44.26	7.72591	0.129435	154192	4576	1437.9	294.7	33.6958	4.8792	0.204952
	11517.8	620.5	273.8	57.3	18.5621	4.77836	0.209277	707775	7718.5	2254.7	883.2	91.6986	2.55288	0.391715	26604.4	1233.7	534.9	81.5	21.5647	6.56319	0.152365	381060	3925.4	1265.9	425.4	97.0754	2.97579	0.336046	237382	4235.9	1975.7	171.5	56.0404	11.5201	0.0868047	89278	1578	579.3	204.2	56.5767	2.83692	0.352494	1.47161e+06	6531.8	1894.5	1029.8	225.3	1.83968	0.543574
	77861.6	1498.7	610.2	168.2	51.9528	3.62782	0.275647	1.04489e+06	11686.1	4297.9	529.7	89.4133	8.11384	0.123246	15674.7	653.8	268.4	80.7	23.9748	3.3259	0.300671	194170	2029	621.6	417.7	95.6973	1.48815	0.671976	19269	1063	362.7	83.6	18.127	4.33852	0.230494	113890	2199.3	895.7	170.7	51.7847	5.24722	0.190577	130513	2796.8	655.2	343.2	46.665	1.90909	0.52381
	181582	4428.4	964.8	323.3	41.0041	2.98423	0.335095	171956	2519.4	938.6	270	68.2526	3.4763	0.287662	30634.6	947.2	361.6	114.9	32.3423	3.14708	0.317754	254876	3318.3	1144.7	315.6	76.8093	3.62706	0.275705	583037	5529.7	2184.1	360.9	105.437	6.05181	0.16524	135268	1849.9	733.2	242.9	73.1217	3.01853	0.331288	17089.1	608.1	186.8	128.6	28.1025	1.45257	0.688437
	164681	2427.2	921.9	239.2	67.8481	3.8541	0.259464	305698	2937	1188.8	334.2	104.085	3.55715	0.281124	697013	8581.9	2781.7	446.8	81.2189	6.22583	0.160621	42689.8	1022.1	288.5	198.1	41.7668	1.45634	0.686655	12116	522.3	154.2	115.8	23.1974	1.33161	0.750973	191214	4139.9	1341	199.4	46.1881	6.72518	0.148695	26716	986.5	268.7	154.6	27.0816	1.73803	0.575363
	15786.2	887.5	397.3	57.2	17.7873	6.9458	0.143972	29331.8	846.8	262.3	155.8	34.6384	1.68357	0.593976	146056	3029.6	739.6	310.7	48.2096	2.38043	0.420092	19654.2	769.8	298.2	87.1	25.5316	3.42365	0.292086	480411	4323.7	1298.1	565.3	111.111	2.2963	0.435483	567534	6442	2336.1	366.9	88.0991	6.36713	0.157057	21600.9	893.4	242.1	126.5	24.1783	1.91383	0.522511
	9130.1	590.4	255.2	48.3	15.4643	5.28364	0.189263	916824	8218.6	2119.6	668.4	111.555	3.17115	0.315343	24921.4	907.3	332.9	106.1	27.4677	3.13761	0.318714	9079.4	556.9	216.2	56	16.3035	3.86071	0.259019	904287	8278.1	1645.6	786	109.238	2.09364	0.477637	79899.5	1472.8	549.3	190.8	54.2501	2.87893	0.347351	718888	9443.5	2086.3	554.6	76.1251	3.76181	0.265829
	203964	4848.3	1072.7	730.7	42.0692	1.46804	0.681178	636803	4987.6	1431	636.9	127.677	2.24682	0.445073	86611.4	3327.7	1367.1	93.5	26.0274	14.6214	0.0683929	141706	2365.4	675.5	314.1	59.9079	2.15059	0.464989	1.32446e+06	11554	3292.1	601.3	114.632	5.47497	0.182649	629027	7113.5	1723.7	534.7	88.4272	3.22368	0.310205	136875	2084.3	706	256.4	65.6695	2.75351	0.363173
	10808.1	495.6	186.6	76	21.8081	2.45526	0.407288	54734.8	1335.5	550.9	137.5	40.9845	4.00655	0.249592	79899.5	2246	977.4	148	35.5741	6.60405	0.151422	37133.7	1052.8	383.8	127.7	35.2714	3.00548	0.332725	126381	1791.8	603	277.6	70.5331	2.17219	0.460365	437817	7522.2	2783.6	229.6	58.2034	12.1237	0.0824831	728068	7023.6	1227.2	839.9	103.66	1.46113	0.684404
	133767	2964.2	975.2	205.9	45.1277	4.73628	0.211136	71864.4	3330.3	834	134.4	21.579	6.20536	0.161151	88492.2	1420.7	443.8	266.5	62.2877	1.66529	0.600496	16419.9	568.2	198.7	109.1	28.8981	1.82126	0.549069	570921	9056.3	2393.7	885.4	63.0413	2.70352	0.369888	930653	7916.6	3121.5	440.3	117.557	7.08948	0.141054	74165.9	1513.3	490.3	228.5	49.0094	2.14573	0.466041
	288208	4422.9	1794.4	221.2	65.1627	8.11212	0.123272	239572	5377.1	1227.4	304.7	44.5541	4.02822	0.248248	16257.7	584.2	207.5	102.8	27.829	2.01848	0.495422	100806	2645.4	1121.4	144.9	38.1061	7.73913	0.129213	90317.2	1472.6	383.6	310.7	61.3318	1.23463	0.809958	641497	6411.4	1759	519	100.056	3.38921	0.295054	1.02472e+06	7534.5	2654.9	534.8	136.003	4.96429	0.201439
	222194	2650.3	819.2	364.7	83.8372	2.24623	0.44519	69360.1	2570.2	629.5	189	26.9863	3.33069	0.300238	25321.9	1369.2	559.6	84.7	18.4939	6.60685	0.151358	236880	2544.7	767.5	445.4	93.0876	1.72317	0.580326	39485.9	1475.4	702.4	78	26.7628	9.00513	0.111048	374049	5062	2284.9	223.3	73.8935	10.2324	0.0977286	694174	4430.8	1498.9	608.2	156.67	2.46449	0.405764
	1.27946e+06	7697.2	3102.5	548.6	166.224	5.6553	0.176825	18255.1	696.9	259.3	98.4	26.1947	2.63516	0.379483	7948.9	596.4	184	85.6	13.3281	2.14953	0.465217	175332	2146.4	762.4	324.8	81.6864	2.34729	0.426023	37458.1	2395.5	705.7	131.9	15.6369	5.35027	0.186907	217560	2755.3	710.3	410.2	78.9606	1.73159	0.577502	319142	3499.6	906.6	507.4	91.1938	1.78676	0.559674
	279509	2597	957	382	107.628	2.50524	0.399164	8288.5	665.7	300.3	39.5	12.4508	7.60253	0.131535	307492	3347.8	910.2	494.1	91.849	1.84214	0.542848	12693.9	577.7	212.7	79.8	21.9732	2.66541	0.375176	254106	2970.8	1025.2	336.9	85.5345	3.04304	0.328619	625377	5850.5	2175.9	381.8	106.893	5.69906	0.175468	65988.9	1423.7	410.9	216.1	46.3503	1.90143	0.525919
	675265	5536.9	2147.3	426.9	121.957	5.02998	0.198808	664477	6403.8	1683.1	630.7	103.763	2.66862	0.374725	29995.9	916.5	362.4	108.5	32.7288	3.34009	0.299393	166536	2546.9	608.6	395.9	65.3878	1.53726	0.650509	99731.1	2085	713.2	194.5	47.8327	3.66684	0.272715	1.04711e+06	7857.5	1990.1	1028.8	133.262	1.93439	0.516959	177005	3675.7	887.8	304.5	48.1554	2.9156	0.342983
	669364	4310.5	1507.7	588.5	155.287	2.56194	0.39033	546065	4239	1578.8	456.1	128.819	3.46152	0.28889	214919	2791	964.1	295.8	77.0043	3.2593	0.306815	191072	3542	1441.3	217.3	53.9448	6.63277	0.150767	506944	7519.8	1440.4	813.9	67.4146	1.76975	0.565051	135907	2789.2	710.1	263.7	48.7261	2.69283	0.371356	228814	2509.9	701.2	447.3	91.1647	1.56763	0.637906
	384426	4577	1833.8	296.4	83.9908	6.18691	0.161632	859788	13637.7	2305.5	1260.3	63.0449	1.82933	0.546649	272685	4538.3	1242	429.3	60.0853	2.89308	0.345652	161583	2881.6	1118.3	203.4	56.0742	5.49803	0.181883	29098.6	1854.7	386.7	143.7	15.6891	2.69102	0.371606	767078	6185.8	2229.6	475.6	124.006	4.68797	0.213312	141361	2786.4	888.2	229	50.7326	3.8786	0.257825
	89039.7	1802.5	640.5	189.8	49.3979	3.3746	0.296331	52205.1	1851	617.1	167.1	28.2037	3.693	0.270783	158278	2959.5	1002.2	237.9	53.4814	4.21269	0.237378	90606.2	1578.6	609.4	196.9	57.3966	3.09497	0.323105	398240	4818.2	1497.1	488	82.6533	3.06783	0.325964	215112	4438.7	1274.9	232.9	48.4628	5.47402	0.182681	109764	3236.8	552.3	287.9	33.9111	1.91837	0.521275
	15862.3	680.1	228.5	96.2	23.3235	2.37526	0.421007	542755	5478	1848.3	438.4	99.079	4.21601	0.237191	194398	4454.3	2044	136.4	43.6427	14.9853	0.0667319	169046	3164.6	747.8	357.9	53.4177	2.08941	0.478604	275306	3898.7	1265.7	434.4	70.6149	2.91367	0.343209	14929.5	821	310.5	75.1	18.1845	4.13449	0.241868	169989	2685	510.7	485.5	63.3105	1.05191	0.950656
	248094	6828.5	1577.4	622	36.3321	2.53601	0.39432	40509.9	1211.6	456.5	120.9	33.435	3.77585	0.264841	12856.1	803.3	301.5	58	16.0041	5.19828	0.192371	69780.9	1659.2	520	204.5	42.057	2.54279	0.393269	90727.8	3009	543.5	269.6	30.1521	2.01595	0.496044	26533.5	770.3	287.7	123	34.4457	2.33902	0.427529	581450	5470.4	1113.4	763.6	106.29	1.45809	0.685827
	435714	4292.3	1580.4	425.6	101.51	3.71335	0.269299	50177.3	1388.2	557.9	118.7	36.1456	4.70008	0.212762	79230.3	1733.9	657.7	177.8	45.6948	3.6991	0.270336	228089	3141.4	908.8	470.6	72.6076	1.93115	0.517826	268138	4576	2105.4	180.3	58.5966	11.6772	0.0856369	22873.3	850.9	308.8	98.7	26.8813	3.12867	0.319624	457669	3594.9	1041.4	632.2	127.311	1.64726	0.607067
	590869	4439.6	1727.8	446.5	133.091	3.86965	0.258421	58420.3	1349.1	550.9	141.4	43.3032	3.89604	0.256671	518300	9944.3	3025.1	398.8	52.1203	7.58551	0.13183	166764	3481.7	809.5	449	47.8974	1.8029	0.554663	82424.1	1849.1	479.4	234.4	44.5753	2.04522	0.488945	42568.1	1128.8	415.5	136.4	37.7109	3.04619	0.328279	106534	2142.9	550.9	274.6	49.715	2.00619	0.498457
	186692	3697.9	1188.3	332.6	50.4861	3.57276	0.279896	228566	3410.9	959.2	331.3	67.0105	2.89526	0.345392	81420.3	1596.2	629.2	177.6	51.0088	3.54279	0.282263	11842.2	861.2	366.8	72.5	13.7508	5.05931	0.197655	18949.6	992.8	441.3	58.8	19.087	7.5051	0.133243	258907	3969.8	1207.8	303.2	65.2191	3.98351	0.251035	460914	4586.6	957.9	662.9	100.491	1.44501	0.692035
	86205.9	1934.6	692.5	201	44.5601	3.44527	0.290253	213870	3893.9	787.7	555	54.9243	1.41928	0.704583	79068.1	1726	589.6	262.5	45.81	2.2461	0.445217	409221	3178.5	824	672.1	128.746	1.22601	0.815655	234842	3642.5	1304.9	243.9	64.4727	5.35014	0.186911	204537	3871.5	1166.8	266.7	52.8314	4.37495	0.228574	369953	3263.3	869.2	587.1	113.368	1.4805	0.675449
	49731.2	1972.5	648.7	159.9	25.2123	4.05691	0.246493	1.14682e+06	8688.7	2081	741.5	131.99	2.80647	0.356319	80857.6	1449.2	358.3	296.2	55.7946	1.20966	0.826682	15477	760.8	265.8	87.7	20.3431	3.03079	0.329947	720505	9045.4	3182	481.7	79.6543	6.60577	0.151383	474480	6065.2	1714.1	584.1	78.2298	2.9346	0.340762	462313	5307.8	2013.5	381.2	87.1007	5.282	0.189322
	299614	5967.9	2401.9	208.3	50.2043	11.531	0.086723	54704.4	1833.9	645.9	159	29.8295	4.06226	0.246168	46725.1	1162.7	478.1	130.2	40.1867	3.67204	0.272328	61036.1	1091.7	301.1	269.3	55.9092	1.11808	0.894387	547079	7704.4	2737.8	642	71.0087	4.26449	0.234495	16080.3	699.8	235.1	103.2	22.9784	2.2781	0.438962	145382	2159.2	700.3	273.5	67.3312	2.56051	0.390547
	435364	7877.5	1621.5	431.2	55.2667	3.76044	0.265927	614173	3781.1	1125.3	719.5	162.432	1.564	0.639385	68812.6	1855.3	673.2	140	37.0897	4.80857	0.207962	11345.4	616.6	238.8	64.5	18.3999	3.70233	0.270101	7624.4	740.5	347.1	36	10.2963	9.64167	0.103717	105916	1871.7	669.5	211.2	56.5881	3.16998	0.315459	159206	2199.2	795.7	275.5	72.3926	2.8882	0.346236
	45822.7	1785.9	784.3	80.7	25.658	9.71871	0.102894	212131	5001.5	1936.6	424.4	42.4134	4.56315	0.219147	331298	4496.7	1719.4	271.8	73.6759	6.32597	0.158078	187909	2386.6	654.4	427.4	78.735	1.53112	0.653117	10473.5	570.4	230.2	60	18.3617	3.83667	0.260643	140971	2405.6	920.7	206	58.6012	4.46942	0.223743	17008	869.1	309.7	77	19.5697	4.02208	0.248628
	280269	3045.9	1133.7	328	92.0152	3.4564	0.289318	97967	1396.1	391.7	322	70.1719	1.21646	0.822058	46218.1	1496.1	534.6	161.2	30.8924	3.31638	0.301534	14082.9	944.9	424.3	48.7	14.9041	8.71253	0.114777	7766.4	646.2	271.2	38.4	12.0186	7.0625	0.141593	92583.2	2468.3	1038.5	119.8	37.5089	8.66861	0.115359	144793	2212.6	629.5	303.2	65.4404	2.07619	0.481652
	90094.1	2802.1	1225.7	107.9	32.1524	11.3596	0.0880313	8886.7	438.3	156.7	74.6	20.2754	2.10054	0.476069	523476	5975.2	2287.4	323.5	87.6081	7.07079	0.141427								113292	2302.8	779.1	208	49.1975	3.74567	0.266975	27091.1	1005.7	314.7	138.2	26.9376	2.27713	0.439148	150334	3375.2	796.3	329.8	44.5409	2.41449	0.414166
	666657	7771.5	2343.1	472.5	85.7823	4.95894	0.201656	11685.1	560.2	220	72.3	20.8588	3.04288	0.328636	16754.5	688.3	270.7	82.8	24.3419	3.26932	0.305874					51.3084	3.38421	0.401391	677810	8892.3	2516.8	422.1	76.2244	5.96257	0.167713	278312	3672.5	1178.8	371.1	75.7828	3.1765	0.314812	168995	3617.3	570.4	512.4	46.7185	1.11319	0.898317
	60108.4	1253.9	440.6	178.6	47.9372	2.46697	0.405356	123608	2155.9	886.8	195.5	57.3348	4.53606	0.220456	272640	4523.6	995.3	704.2	60.2705	1.41338	0.707525					29.5897	2.20122	0.198548	15674.7	652	265.2	78.9	24.041	3.36122	0.297511	253736	3338.3	1405.2	240.5	76.0075	5.84283	0.17115	1.00398e+06	12916.3	2158.2	928.9	77.7295	2.32339	0.430405
	430538	5396.8	1505.7	551.6	79.7765	2.7297	0.366341	716540	6028.6	2550	514.9	118.857	4.95242	0.201922	160083	2318.9	782.4	275.9	69.034	2.83581	0.352633								55616.9	1884.4	650.5	155.6	29.5144	4.18059	0.239201	469081	3948.7	1286.5	494.3	118.794	2.60267	0.384221	1.00128e+06	8601.8	2640.4	646.1	116.404	4.08667	0.244698
	222893	2749.7	1083.4	270.9	81.061	3.99926	0.250046	897073	6187.9	1968.6	753	144.972	2.61434	0.382505	328110	3701.5	1565.3	285.1	88.6423	5.49035	0.182138								292765	4160.7	1085.4	576.5	70.3645	1.88274	0.531141	71778.2	1762.8	778.5	125	40.7183	6.228	0.160565	25088.7	1017.5	258.5	149.3	24.6572	1.73141	0.577563
	13190.7	978.9	351.8	61.6	13.475	5.71104	0.175099	59489.9	1306.4	483.4	162.4	45.5373	2.9766	0.335954															7943.8	559.2	167	70.9	14.2057	2.35543	0.424551	192431	2341.5	912.6	279.6	82.1828	3.26395	0.306377	66049.8	1770.5	466.8	203.2	37.3057	2.29724	0.435304
	81141.5	1911	783.8	143.5	42.4602	5.46202	0.183082	15304.6	578.5	184.1	110.6	26.4557	1.66456	0.60076					48.3121	4.00288	0.327699								238112	4378.1	1442.9	250.7	54.387	5.75548	0.173747								8567.4	727.1	187	82.9	11.783	2.25573	0.443316
	179144	2947	1165.5	208.4	60.7886	5.59261	0.178807	765785	9457.9	2497.4	593.6	80.9678	4.20721	0.237687					29.1154	2.32052	0.167935								100958	1575.9	644.2	212.9	64.0637	3.02583	0.330487					57.2269	3.76877	0.344578	167905	3025.8	642.1	349.6	55.4911	1.83667	0.544463
	108248	2747.9	1228	129.3	39.3929	9.49729	0.105293	35491.2	960.1	332.9	140.8	36.9661	2.36435	0.42295															147171	2383.2	765.4	294.2	61.7535	2.60163	0.384374					29.0597	2.12791	0.172657	116714	1819.3	690.5	226.7	64.1531	3.04588	0.328313
	490327	3710.6	1250.6	535.3	132.142	2.33626	0.428035	918041	6242	2528.9	503.7	147.075	5.02065	0.199178															238467	2950.2	911.4	344.5	80.8307	2.64557	0.37799								325286	3559.9	1372.3	308.7	91.375	4.44542	0.224951
	36145.1	1432.1	391.8	182.6	25.2392	2.14567	0.466054	24140.7	998.9	376.1	89	24.1673	4.22584	0.236639															224632	3208.1	758.5	497.4	70.0203	1.52493	0.655768								109287	1453.2	418.3	341.7	75.2044	1.22417	0.816878
								124982	2895.4	973	195.8	43.1657	4.96936	0.201233															92684.6	1312	410.9	307.5	70.6438	1.33626	0.748357								113611	1757.7	477.2	334.7	64.6363	1.42575	0.701383
					60.4841	4.77783	0.313625	11046.3	753.9	225.1	99.5	14.6522	2.26231	0.442026															11558.3	610.8	269.8	57.9	18.9232	4.65976	0.214603								11325.1	797.7	287.1	67.5	14.1972	4.25333	0.23511
					36.1325	4.60716	0.159852	512957	6746.9	2363.4	315.6	76.0285	7.48859	0.133536															22092.6	763.1	284	102.6	28.9511	2.76803	0.361268								386900	4256.3	1009.7	541.7	90.9005	1.86395	0.536496
								864452	7646.5	2015.8	798.4	113.052	2.5248	0.396071															148160	3316.9	888.7	293.1	44.6681	3.03207	0.329808								166754	2522.2	839.5	269.1	66.1146	3.11966	0.320548
								316293	4715.1	1298.1	488.8	67.0808	2.65569	0.37655															234401	3296.5	1259.3	257	71.106	4.9	0.204082								11908.1	667.7	187	101.9	17.8345	1.83513	0.54492
								223998	2385.4	770.8	390.3	93.9039	1.97489	0.506357															604262	4772	1517	570.8	126.627	2.65767	0.376269								31851.3	1724.2	341.1	161.5	18.4731	2.11207	0.473468
								560417	5000.4	1389.8	560	112.074	2.48179	0.402936															347074	5267.1	1754.3	295.4	65.8948	5.93873	0.168386								9125	873.5	343.8	53.3	10.4465	6.45028	0.155032
								368817	3622	1395.2	348.9	101.827	3.99885	0.250072															8476.1	539.9	226.4	52.5	15.6994	4.31238	0.23189								20637.7	1044.6	250.8	132.1	19.7566	1.89856	0.526715
								26933.9	745.5	264.5	134.3	36.1286	1.96947	0.50775															7847.5	640.1	297.6	37.1	12.2598	8.02156	0.124664								134949	1979.6	621.4	307.1	68.1696	2.02345	0.494207
								13165.3	577.4	208.5	88.4	22.801	2.3586	0.423981															678945	5136.4	1809.8	501.2	132.183	3.61093	0.276937								28870.5	1328.8	459.3	87.7	21.7267	5.23717	0.190943
								373887	5004.1	1414.6	368.2	74.7161	3.84193	0.260286															367763	5202.8	1549.8	419	70.6855	3.69881	0.270357								253999	5273.3	1233.7	675.4	48.1671	1.82662	0.547459
								177045	2116.4	672.5	360.3	83.6539	1.8665	0.535762															185324	3239.5	715	461.8	57.2075	1.54829	0.645874								544499	5032	1203.1	722.1	108.207	1.66611	0.600199
								351322	3516.8	1070.6	471.5	99.8983	2.27063	0.440407															9723.2	609.4	254.9	53.3	15.9554	4.78236	0.209102								101820	2331.1	592.7	361.1	43.6789	1.64137	0.609246
								601768	6232	1536.3	563.8	96.561	2.7249	0.366986															102626	1498.5	384.2	363.9	68.4857	1.05578	0.947163								67808.9	1891.5	598.4	180.2	35.8493	3.32075	0.301136
								527602	4211.6	1333.2	536.7	125.274	2.48407	0.402565															141655	2357.2	948.2	199.7	60.0948	4.74812	0.21061								58202.3	2593.6	408.9	276.4	22.4407	1.47938	0.67596
								600775	4647.6	1229.7	671.9	129.266	1.83018	0.546393															223664	2855.3	1140.1	266.2	78.3329	4.28287	0.233488								87691.2	2083.8	532.4	249.8	42.0823	2.13131	0.469196
								486357	6430.8	1423.5	918	75.6294	1.55065	0.644889															59971.5	1616.5	479.3	173.5	37.0996	2.76254	0.361986								27435.8	735.8	279.3	127	37.287	2.19921	0.454708
								100512	4284	636.2	358.8	23.4621	1.77313	0.563974															647332	6781.3	2374	457.3	95.4585	5.19134	0.192628								13687.5	642.5	267.4	73.4	21.3035	3.64305	0.274495
								543211	4349.4	1761.6	411.2	124.893	4.28405	0.233424															63798.9	1947	862.3	102.2	32.7678	8.43738	0.11852								10889.2	599.2	198.9	79.7	18.1729	2.49561	0.400704
								48610.9	1155.6	371.4	179.3	42.0655	2.07139	0.482768															21813.8	1108.7	458.1	66.6	19.6751	6.87838	0.145383								513215	5026.9	1761.5	409.4	102.094	4.30264	0.232416
								653182	3907.5	1406.7	604.4	167.161	2.32743	0.429658															162689	3387.3	1061.8	242.8	48.029	4.37315	0.228668								103386	1845.7	583.4	266.5	56.0146	2.18912	0.456805
								26883.3	1098.1	421.1	91.9	24.4817	4.58215	0.218238															55358.3	1891	749.6	102.9	29.2746	7.28474	0.137273								337589	6475.6	1031	740.2	52.1325	1.39287	0.717944
								730983	11982.9	2272.4	904	61.0022	2.51372	0.397817															54253.2	1334.7	429.6	168.7	40.6482	2.54653	0.392691								59616.6	1481.8	584.1	135.1	40.2326	4.32346	0.231296
								251972	3188.4	1351.7	249.9	79.0276	5.40896	0.184878															478672	6127.5	2064.9	428.2	78.1186	4.82228	0.207371								49574.1	1373.8	430.8	212.1	36.0854	2.03112	0.49234
								606746	5124.7	1695.3	538.3	118.396	3.14936	0.317525															19608.6	1024	444.1	58.4	19.149	7.60445	0.131502								191899	3898.5	732	417.1	49.2237	1.75497	0.569809
								228201	2970.1	991.8	332.4	76.8328	2.98375	0.335148															114899	2875.2	791.3	230.7	39.9621	3.43	0.291546								86819.3	1763.5	514.6	247.9	49.2312	2.07584	0.481733
								457142	4520.2	978.4	638.4	101.133	1.53258	0.652494															207244	2835.8	1028.7	327.9	73.0813	3.13724	0.318752								23623.6	780.3	205.7	178.9	30.275	1.1498	0.869713
																													513925	5870.8	1970.5	456.8	87.5392	4.3137	0.231819								110570	2197.3	685.6	287	50.3207	2.38885	0.418611
												65.9971	3.45441	0.357574															694468	6007.3	2208.2	442.9	115.604	4.98578	0.200571								7796.8	536.3	183.8	67.7	14.5381	2.71492	0.368335
												37.8288	1.81958	0.157634															169872	2407.4	943.5	239.4	70.5624	3.9411	0.253736								75220.4	1288.7	382.5	258.7	58.3692	1.47855	0.67634
																													34218.7	1162.8	524.2	88.6	29.4278	5.91648	0.169019								206676	2456.1	612.5	467.4	84.1481	1.31044	0.763102
																													96076.1	2268.4	951.2	140.4	42.3541	6.77493	0.147603								305622	4160.5	1182.3	404.2	73.4579	2.92504	0.341876
																													254506	3884.9	1761.7	192.8	65.5117	9.13745	0.10944								146466	2551.4	610.3	358.1	57.4062	1.70427	0.586761
																													26558.8	1074.2	297.4	149.2	24.7243	1.9933	0.501681								21514.7	812.2	313.5	90.9	26.4894	3.44884	0.289952
																													578646	5182.2	1890.8	490.2	111.66	3.8572	0.259255								9708	909	207.6	110.9	10.6799	1.87196	0.5342
																													370414	5027.7	1694.2	426.2	73.6746	3.97513	0.251564								45645.3	1447	471.5	143.3	31.5448	3.2903	0.303924
																													217449	3134.1	1203.1	273.1	69.3815	4.40535	0.226997								583320	5609	1327.1	624.4	103.997	2.1254	0.4705
																													462866	8274.1	2511.7	441.2	55.9415	5.69288	0.175658								272599	4645.1	1153.2	400.9	58.6853	2.87653	0.347641
																													200877	2842	1267.8	216.4	70.6815	5.8586	0.170689								9941.2	565.2	222.4	60	17.5888	3.70667	0.269784
																													219588	3021.4	1245.2	232.2	72.6776	5.36262	0.186476								214843	2478.8	596.4	563.7	86.6722	1.05801	0.945171
																													174957	2461.4	806.9	304.6	71.0801	2.64905	0.377494								21702.3	1100.3	211.9	147.1	19.724	1.44052	0.694195
																													407999	5169.1	2117.3	257.9	78.9304	8.20977	0.121806								57614.2	1895.2	760.6	148.8	30.4001	5.11156	0.195635
																													196030	3868.9	1670.9	162.1	50.6682	10.3078	0.0970136								62693.8	1571	329.3	299.6	39.9069	1.09913	0.909809
																													174556	3600.2	1036.6	239	48.4851	4.33724	0.230561								312556	3961.8	1204	427.5	78.8925	2.81637	0.355066
																													370024	6804.2	2929.1	220	54.3817	13.3141	0.0751084								224237	3578.2	988	333.5	62.6675	2.96252	0.337551
																													237498	4168.4	1097.6	327.9	56.9759	3.34736	0.298743								183970	2520.7	622	397	72.9837	1.56675	0.638264
																													400151	4701.3	1548.6	390.3	85.1151	3.96772	0.252034								64574.6	1428.7	546.8	169.9	45.1982	3.21836	0.310717
																													23922.7	777	253	128.2	30.7885	1.97348	0.506719								12800.3	564	208.2	80.6	22.6956	2.58313	0.387128
																													604369	6873.7	2070.5	432.7	87.9248	4.78507	0.208983								429955	5186	1462.4	466.1	82.9068	3.13752	0.318723
																													224769	3217.2	1128.5	267.4	69.8648	4.22027	0.236952								214868	2603.1	702.5	446.2	82.5432	1.57441	0.63516
																													369208	4673.9	1607.3	310.2	78.9935	5.1815	0.192994								35876.4	829.9	279	166.6	43.2298	1.67467	0.597133
																													374338	4315.9	1646.3	317.7	86.7346	5.18193	0.192978								15553.1	650.4	247.2	92.7	23.9131	2.66667	0.375
																													363276	4932.2	1879.9	295.9	73.654	6.35316	0.157402								262511	2535.4	874.1	414.4	103.538	2.10931	0.474088
																													688501	5754.1	1929	469.7	119.654	4.10688	0.243494								222726	3094.1	679.2	529.2	71.9841	1.28345	0.779152
																													311051	6371.9	1893.8	712.3	48.816	2.65871	0.376122								48428.4	1109.5	355.2	193.4	43.6489	1.83661	0.544482
																													30796.9	955.5	345.5	116.2	32.2312	2.97332	0.336324								175925	4096.9	806.9	302.8	42.941	2.6648	0.375263
																													359773	6676.5	2637.3	204.7	53.8865	12.8837	0.0776173								19907.7	798.7	325.9	80.1	24.9251	4.06866	0.245781
																													387959	6410.9	2717.9	226.1	60.5156	12.0208	0.0831892								497860	4017.8	1201	598.9	123.914	2.00534	0.498668
																													325321	6119.8	2091	243.9	53.1588	8.57319	0.116643								233904	2547.5	922.2	333.2	91.8171	2.76771	0.36131
																													716393	7516.3	2787	350.1	95.312	7.96058	0.125619								51429.5	1463.1	284.3	250.9	35.151	1.13312	0.882518
																													974545	7968.8	2213.9	585.9	122.295	3.77863	0.264646								573394	5196.7	1025.2	736.8	110.338	1.39142	0.718689
																													242867	4821.4	1652.9	242.7	50.3727	6.81047	0.146833								51510.6	1014.7	326.7	209.6	50.7644	1.55868	0.641567
																													131106	2466.8	1003.7	193.4	53.1482	5.18976	0.192687								333843	3025.4	772.9	585.1	110.347	1.32097	0.757019
																																											68716.3	1772.4	350.1	328.1	38.7702	1.06705	0.937161
																																	52.8831	4.76753	0.291444								413033	8256.1	1330	530.2	50.0276	2.50849	0.398647
																																	29.4256	2.93395	0.17052								695168	5982.2	1138.9	854.7	116.206	1.33251	0.750461
																																											586433	6014.5	1642.1	593	97.5032	2.76914	0.361123
																																											22412	1061.1	293.9	119.9	21.1215	2.45121	0.407962
																																											25494.2	862.3	302	118.5	29.5653	2.54852	0.392384
																																											66952.1	1265.5	369.9	242.6	52.9056	1.52473	0.655853
																																											366784	4628	1270.8	480	79.2533	2.6475	0.377715
																																											50608.2	1252.4	371.1	192.4	40.409	1.92879	0.518459
																																											17165.1	836.6	314.9	90	20.5177	3.49889	0.285805
																																											32125.1	1501.1	535.9	113.5	21.401	4.72159	0.211793
																																											48058.3	1096.4	414.5	150.9	43.8328	2.74685	0.364053
																																											569876	5354.7	1053	887.6	106.425	1.18635	0.842925
																																											54912.2	1087.4	407.9	181.7	50.4986	2.24491	0.445452
																																											230163	4332.5	1222.4	372.3	53.1247	3.28337	0.304565
																																											457654	3964.1	1096.4	623.6	115.45	1.75818	0.568771
																																											28307.8	904.2	383.4	98.2	31.307	3.90428	0.256129
																																											60280.7	1657.2	678.5	116.6	36.375	5.81904	0.17185
																																											155140	2319.2	713.8	311.4	66.8938	2.29223	0.436257
																																											89328.7	1978.6	512.2	283.9	45.1474	1.80416	0.554276
																																											339166	3409.2	925.3	509.4	99.4855	1.81645	0.550524
																																											745994	4826.2	1459.5	699.6	154.572	2.08619	0.479342
																																											28231.7	834	308.2	125.7	33.851	2.45187	0.407852
																																											1.24883e+06	6292	2224.3	725.9	198.479	3.0642	0.32635
																																											475407	4306.9	1299.8	495.2	110.383	2.6248	0.380982
																																											1.03482e+06	5505.7	2086.8	651.5	187.954	3.20307	0.3122
																																											445006	4714.2	1268.3	551.8	94.3969	2.29848	0.435071
																																											36337.8	2173.8	458.6	157.1	16.7163	2.91916	0.342564
																																											53964.2	1285.3	460.2	171.2	41.9857	2.68808	0.372012
																																											285993	2805.4	845.6	459.6	101.944	1.83986	0.543519
																																											21773.3	929.3	343.4	91.6	23.4298	3.74891	0.266744
																																											869835	6489.2	2017.8	588.5	134.044	3.42872	0.291654
																																											969460	5281.2	1983.3	639	183.568	3.10376	0.32219
																																											347328	5547.2	2076.1	440.3	62.6132	4.71519	0.21208
																																											117251	1769.5	552.9	327.5	66.2623	1.68824	0.592331
																																											74100	1628.2	681.1	145.6	45.5104	4.67788	0.213772
																																											263003	2575.9	831.6	425.1	102.101	1.95625	0.511183
																																											25235.7	739.5	264.8	124.7	34.1254	2.1235	0.470921
																																											373537	6561.5	2200.2	420.6	56.9286	5.2311	0.191164
																																											210154	2832.2	1125.8	288.6	74.2016	3.9009	0.256351
																																											405363	2812.1	924.2	575.8	144.149	1.60507	0.623025
																																											12521.5	605.8	197.9	95.7	20.6694	2.06792	0.483578
																																											71996.2	1468.1	575.9	163.9	49.0404	3.51373	0.284598
																																											33037.6	888.2	305.9	141.8	37.1961	2.15726	0.46355
																																											19517.4	810.7	247	109.9	24.0748	2.2475	0.444939
																																											294626	6500.1	1620.2	437.7	45.3264	3.70162	0.270152
																																											63981.4	1327.7	371.9	251.8	48.1897	1.47697	0.677064
																																											80401.4	1610	512.7	222.4	49.9388	2.30531	0.433782
																																											284943	2994	822.5	511.8	95.1714	1.60707	0.622249
																																											10909.4	900.6	424.3	38.1	12.1135	11.1365	0.089795
																																											35607.8	955.4	245.9	208	37.27	1.18221	0.845872
																																											102347	1383.9	433.8	306	73.9555	1.41765	0.705394
																																											61842.1	1319.1	360.9	246.7	46.882	1.46291	0.683569
																																											112917	3448.8	1319.2	162.1	32.7409	8.13819	0.122878
																																											37326.3	920	322.4	155.6	40.5721	2.07198	0.48263
																																											563484	3522.3	1115.4	680.7	159.976	1.63861	0.610274
																																											38137.4	1054.3	407.9	127.6	36.1732	3.19671	0.312822
																																											36104.6	937.2	268.5	183.4	38.5239	1.46401	0.683054
																																											218042	3903.8	1519.1	199.3	55.8537	7.62218	0.131196
																																											885216	7375	1663.7	764.2	120.029	2.17705	0.459338
																																											20799.9	692.5	213.2	135.6	30.036	1.57227	0.636023
																																											26645	1171.5	509.1	73.9	22.7443	6.88904	0.145158
																																											33939.9	1030.1	338.2	173.9	32.9482	1.9448	0.514193
																																											228094	4119.1	881.6	494.5	55.3748	1.78281	0.560912
																																											340616	3367.5	1045.7	470.1	101.148	2.22442	0.449555
[truncated: 120 more columns]

## Sheet: 350 degrees C
	Area	Perimetre	Length	Width	Area/Perimetre	Length/Width	Width/Length	Area	Perimetre	Length	Width	Area/Perimetre	Length/Width	Width/Length	Area	Perimetre	Length	Width	Area/Perimetre	Length/Width	Width/Length	Area	Perimetre	Length	Width	Area/Perimetre	Length/Width	Width/Length	Area	Perimetre	Length	Width	Area/Perimetre	Length/Width	Width/Length	Area	Perimetre	Length	Width	Area/Perimetre	Length/Width	Width/Length	Area	Perimetre	Length	Width	Area/Perimetre	Length/Width	Width/Length
Graminoids
	Agropyron repens S&L	Agropyron repens S&L	Agropyron repens S&L	Agropyron repens S&L	Agropyron repens S&L	Agropyron repens S&L	Agropyron repens S&L	Agropyron cristatum S&L	Agropyron cristatum S&L	Agropyron cristatum S&L	Agropyron cristatum S&L	Agropyron cristatum S&L	Agropyron cristatum S&L	Agropyron cristatum S&L	Agropyron sp.	Agropyron sp.	Agropyron sp.	Agropyron sp.	Agropyron sp.	Agropyron sp.	Agropyron sp.	Agropyron cristatum I	Agropyron cristatum I	Agropyron cristatum I	Agropyron cristatum I	Agropyron cristatum I	Agropyron cristatum I	Agropyron cristatum I	Agropyron cristatum I	Bromus sp.	Bromus sp.	Bromus sp.	Bromus sp.	Bromus sp.	Bromus sp.	Festuca sp.	Festuca sp.	Festuca sp.	Festuca sp.	Festuca sp.	Festuca sp.	Festuca sp.	Agropyron repens I	Agropyron repens I	Agropyron repens I	Agropyron repens I	Agropyron repens I	Agropyron repens I	Agropyron repens I
	709098	5131.1	1415.7	713.6	138.196	1.98388	0.504062	855768	5205.6	1927.7	579	164.394	3.32936	0.300358	1.25457e+06	22025.5	4002	1467.4	56.9597	2.72727	0.366667	10716.8	478.5	150.9	97.5	22.3967	1.54769	0.646123	172533	2029.1	753.5	327.2	85.0295	2.30287	0.43424	229636	3320.7	1018.2	314.3	69.1528	3.23958	0.308682	135334	2645.5	842.3	260.1	51.1562	3.23837	0.308797
	178966	3679.7	1290.3	227.8	48.6362	5.66418	0.176548	108968	1981.8	744.2	195.2	54.9842	3.8125	0.262295	740422	8114.7	2213.7	517.2	91.2446	4.28016	0.233636	31744.9	834.1	284	152.7	38.0589	1.85986	0.537676	715445	6015.9	1363.6	710	118.926	1.92056	0.520681	275382	4354.6	1662.4	256.5	63.2394	6.48109	0.154295	294717	4082.5	1063.9	391	72.1903	2.72097	0.367516
	9287.2	655.7	304.5	43.4	14.1638	7.01613	0.142529	24713.5	677.4	199.9	163.6	36.4829	1.22188	0.818409	1.12888e+06	13847.6	4129.8	432.3	81.5216	9.55309	0.104678	10569.8	535.5	213.7	65.2	19.7382	3.27761	0.305101	10650.9	796.3	309	67.7	13.3755	4.56425	0.219094	16577.1	906.5	277.1	83.5	18.2869	3.31856	0.301335	249275	3280.5	846.1	393.1	75.9868	2.15238	0.464602
	19892.5	695.3	256.1	101.4	28.61	2.52564	0.395939	26097.5	1127.8	417.3	99.2	23.1402	4.20665	0.237719	8004.7	667.8	237.9	54.3	11.9867	4.38122	0.228247	138725	2065.7	681.8	276.9	67.1566	2.46226	0.406131	60584.9	1698.7	551.1	152.2	35.6655	3.62089	0.276175	108963	2017.2	735.9	204.7	54.0168	3.59502	0.278163	19238.5	693.5	172.1	150.3	27.7412	1.14504	0.873329
	20876	862.9	311.8	89.3	24.1928	3.4916	0.286402	58460.8	1238.9	314.2	257.4	47.1877	1.22067	0.819223	449153	4650.7	1454.6	444.5	96.5774	3.27244	0.305582	27309.1	905.7	307.4	125.7	30.1525	2.44551	0.408913	781673	4455.8	1182.1	863.4	175.428	1.36912	0.730395	149158	3035.3	1021.1	243.6	49.1412	4.19171	0.238566	144449	3105.7	1078.5	244.7	46.5108	4.40744	0.226889
	14153.9	659.9	197.5	101	21.4486	1.95545	0.511392	251120	2521.1	739.4	460	99.6073	1.60739	0.622126	934861	8019.6	2152.2	660.4	116.572	3.25893	0.306849	73385.3	2130.4	718	141.8	34.4467	5.06347	0.197493	164894	4325.5	891.9	403	38.1213	2.21315	0.451844	170389	3086	944.4	326.1	55.2135	2.89604	0.345299	283782	3115.6	1190.2	315.5	91.0843	3.77242	0.265081
	694711	8430.6	1517.2	816	82.4036	1.85931	0.537833	132799	2385.2	638.1	311.4	55.6763	2.04913	0.488011	15101.9	625.5	251.5	80.2	24.1437	3.13591	0.318887	204922	2429.3	750.7	392.4	84.3544	1.9131	0.522712	7720.8	480.7	192.2	55.5	16.0616	3.46306	0.288762	21981.1	978.2	389.1	75.9	22.471	5.12648	0.195066	10650.9	533.7	203.4	70.5	19.9567	2.88511	0.346608
	463443	5319.9	1244.7	697.8	87.1151	1.78375	0.560617	144104	2008.4	732.5	271.2	71.7506	2.70096	0.370239	239977	3914.4	1569.2	208.7	61.3063	7.51893	0.132998	49128	981.6	259.8	248.2	50.0489	1.04674	0.95535	162704	4822.6	711.3	467.5	33.7378	1.5215	0.657247	236287	3399.9	1354.6	233.6	69.4981	5.7988	0.172449	135516	3840	1438.4	292.4	35.2907	4.91929	0.203281
	359591	8486.1	1465.6	974.3	42.3741	1.50426	0.664779	30376.1	1367.7	361.6	145.5	22.2096	2.48522	0.402378	113246	2280.5	834.1	190.1	49.6585	4.38769	0.22791	15441.5	717	266.7	85.1	21.5363	3.13396	0.319085	1.00846e+06	5398.9	1517.9	886.8	186.791	1.71166	0.584228	664832	6227.2	2486.3	371.7	106.763	6.689	0.149499	582986	4603.3	1327.5	590.8	126.645	2.24695	0.445047
	8116.2	516.2	189.4	64.8	15.723	2.92284	0.342133	181425	2841.5	1175.8	209.5	63.8484	5.61241	0.178177	21641.5	1119.2	390.1	83.9	19.3366	4.64958	0.215073	436150	4295.2	928.7	697.8	101.543	1.3309	0.751373	17053.6	885.3	276.3	106.2	19.2631	2.60169	0.384365	15223.5	841.4	326.3	94.4	18.0931	3.45657	0.289304	970372	8744.3	2182	906.1	110.972	2.40812	0.415261
	294651	4093.3	1261.1	413.3	71.9838	3.05129	0.32773	55084.6	1843.4	780.9	105.9	29.8821	7.37394	0.135613	104882	3865	1099.6	200.4	27.1363	5.48703	0.182248	16876.2	997.9	396.4	72.5	16.9117	5.46759	0.182896	126082	1929.7	702.9	242	65.3377	2.90455	0.344288	537782	6053.2	2131.6	375.1	88.8425	5.68275	0.175971	464026	4361.3	1005.5	660	106.396	1.52348	0.65639
	10438	619.2	180.1	83.9	16.8572	2.1466	0.465852	400618	4373.3	1097.9	524.9	91.6054	2.09164	0.478095	38725.5	1309	402	143.6	29.584	2.79944	0.357214	293277	5431.1	2198.3	195.4	53.9996	11.2503	0.0888869	43617.5	1064.8	302.1	200.4	40.9631	1.50749	0.663357	705778	10064.4	2076.1	661.9	70.1262	3.13658	0.318819	235030	4798.9	909.1	748.9	48.9757	1.21391	0.823782
	57852.5	2236	797.7	124.3	25.8732	6.41754	0.155823	296943	4575	1801.8	315.4	64.9055	5.71275	0.175047	482976	6769.9	2429.7	312.1	71.3417	7.785	0.128452	20561.7	782.2	272.9	101.9	26.287	2.67812	0.373397	640372	5074.5	1057.7	834.2	126.194	1.26792	0.788692	15542.9	744.2	278.9	81.3	20.8854	3.4305	0.291502	194905	2526.1	601.5	464	77.1564	1.29634	0.771405
	23319.4	739.6	269.2	113.9	31.5297	2.36348	0.423105	19608.6	780.4	326.6	79.1	25.1263	4.12895	0.242192	96821.3	3041.8	486.5	407.7	31.8303	1.19328	0.838027	40687.3	1350.4	508.1	121.5	30.1298	4.18189	0.239126	10275.8	528.7	209.6	65.7	19.436	3.19026	0.313454	37965.1	1055	410.1	125	35.9859	3.2808	0.304804	499776	3912.3	1175.1	608.5	127.745	1.93114	0.517828
	894027	7905.7	1314.2	1158.5	113.086	1.1344	0.881525	17504.8	937.7	292.6	85.6	18.6678	3.41822	0.29255	10458.3	612.7	251.3	58.3	17.0692	4.31046	0.231994	186064	2812.7	626.2	440.3	66.1513	1.42221	0.70313	15882.6	959.8	292.9	103.1	16.5478	2.84093	0.351997	367641	4167.3	1455.4	342.8	88.2205	4.24562	0.235537	43176.4	1142.4	400.2	140.7	37.7945	2.84435	0.351574
	30746.2	1297.4	325.6	173	23.6983	1.88208	0.531327	15857.2	886.5	313.8	70.1	17.8874	4.47646	0.223391	10757.4	880.4	285.1	85	12.2188	3.35412	0.298141	29058	1452.5	658.2	61.3	20.0055	10.7374	0.0931328	26609.5	1269.9	571.3	67.1	20.954	8.51416	0.117451	442618	5775.3	2535.3	240.6	76.6398	10.5374	0.0949	145909	2629.8	723.2	309.3	55.4828	2.33818	0.427683
	7690.3	602.4	213	59.6	12.7661	3.57383	0.279812	76300.2	1324	432.1	242.2	57.6285	1.78406	0.560518	9773.9	525.6	188.2	71.1	18.5957	2.64698	0.37779	562130	5205.2	1105.3	806.3	107.994	1.37083	0.729485	390454	5121.3	1274.2	452.9	76.2411	2.81342	0.355439	490322	6207.6	1535.8	588.4	78.9873	2.61013	0.383123	248824	4139.4	700.9	559.4	60.111	1.25295	0.798117
	9484.9	705.3	258.3	72.4	13.448	3.56768	0.280294	21078.7	720.8	268.6	102.6	29.2435	2.61793	0.381981	14828.1	1074.5	505.3	43.8	13.8	11.5365	0.0866812	42720.2	1094.5	377.3	156.9	39.0317	2.40472	0.415849	13140	1005.7	295.1	96	13.0655	3.07396	0.325313	130462	2109.7	675.5	271.6	61.8392	2.48711	0.402073	8597.8	747	296.9	62.3	11.5098	4.76565	0.209835
	294469	3358.9	1033.1	394.8	87.6682	2.61677	0.382151	405844	5857.4	2355.1	245.7	69.2875	9.58527	0.104327	284107	6022	1916.3	593	47.1781	3.23153	0.309451	38553.1	1944.9	425	184.1	19.8227	2.30853	0.433176	14199.5	812.1	249.3	91.1	17.4849	2.73655	0.365423	9804.3	515.2	204.8	66.4	19.0301	3.08434	0.324219	104177	1726.8	398.8	368.3	60.3295	1.08281	0.923521
	221494	2423.5	717.9	408.9	91.3943	1.75569	0.569578	229560	2941.1	691.5	453.5	78.0523	1.52481	0.655821	14671	785.2	250.1	101.9	18.6844	2.45437	0.407437	21494.4	688.4	204.9	144.5	31.2237	1.41799	0.705222	20764.4	696	257.5	106	29.8339	2.42925	0.41165	636043	6433.7	2345.7	404	98.8611	5.80619	0.17223	299858	3549.9	766.4	564.5	84.4693	1.35766	0.736561
	36109.6	1695.6	613.5	100.2	21.2961	6.12275	0.163325	845973	9269.8	3738.1	337	91.2612	11.0923	0.0901528	10189.6	682.9	277.7	55.4	14.9211	5.01264	0.199496	146558	2417.7	952	206.2	60.6186	4.61688	0.216597	448605	6227.7	2015.4	301.6	72.0338	6.68236	0.149648	14326.2	540.3	182.8	101.9	26.5153	1.79392	0.55744	8126.3	496.8	203.6	54.8	16.3573	3.71533	0.269155
	35171.8	1412.4	391.2	173.4	24.9022	2.25606	0.443252	283047	3022.5	954	395	93.6467	2.41519	0.414046	40378.1	1713.3	545	146.3	23.5674	3.72522	0.26844	31557.3	1283.6	420.7	125.7	24.585	3.34686	0.298788	663580	11665.8	4468.2	408.9	56.8825	10.9274	0.0915134	19441.3	801.2	324.2	84.5	24.2652	3.83669	0.260642	162349	2623.7	872.6	265.6	61.8778	3.28539	0.304378
	8577.5	593.3	246.2	50.2	14.4573	4.90438	0.203899	322726	3320.5	999.6	454.5	97.1919	2.19934	0.454682	58942.4	1206.5	360.8	219.6	48.854	1.64299	0.608647	103188	3376.5	1311.1	228.6	30.5608	5.73535	0.174357	115234	3617.1	911.3	278.7	31.858	3.26982	0.305827	437782	4863.3	1099.4	649.5	90.0175	1.69269	0.590777	655428	4769.9	1605.7	529.9	137.409	3.03019	0.330012
	52032.8	1925	739.4	149.7	27.03	4.93921	0.202461	32221.4	948.5	377.8	115.8	33.9709	3.26252	0.306511	27131.7	1829	715.1	89	14.8342	8.03483	0.124458	246816	4062.9	1133.4	488.5	60.7487	2.32016	0.431004	371225	4289.5	1198.3	470.5	86.5428	2.54687	0.39264	8891.8	492.3	197.4	59.7	18.0618	3.30653	0.302432	34984.2	1181.5	404.3	125.2	29.61	3.22923	0.309671
	116339	1908.8	422.8	390.6	60.9486	1.08244	0.923841	18589.6	761.2	314.9	78	24.4214	4.03718	0.247698	194053	2239.8	570.5	456	86.6386	1.2511	0.799299	123122	2118.7	869.5	190.2	58.1119	4.5715	0.218746	14919.4	617.1	244.4	80.1	24.1766	3.05119	0.327741	680218	7780.8	2455.8	570.2	87.4226	4.30691	0.232185	150111	2915.9	841.9	337.3	51.4803	2.496	0.400641
	369806	3973.6	1403.3	347.1	93.0657	4.04293	0.247346	381344	3773	1288.3	418.2	101.072	3.08058	0.324614	801256	8579.9	1661.7	1159.1	93.3875	1.43361	0.697539	47429.7	1224.7	312.6	219	38.7276	1.4274	0.700576	14250.2	596.1	215.7	90.9	23.9057	2.37294	0.421419	154907	2026	748.1	268	76.4595	2.79142	0.358241	13682.4	664.2	219.8	87.2	20.5998	2.52064	0.396724
	72270	1655.8	627.5	166.3	43.6466	3.7733	0.26502	24059.6	700.9	251.2	127.8	34.3267	1.96557	0.508758	764761	6323.4	1862	566.1	120.941	3.28917	0.304028	453690	5661.7	1139.6	860.8	80.1331	1.32388	0.755353	58075.5	1562.8	538.7	181.7	37.1612	2.96478	0.337293	10067.9	606.8	231.4	57.8	16.5918	4.00346	0.249784	80051.6	1689.8	595.4	181.9	47.3734	3.27323	0.305509
	141422	2979.6	908.4	259.7	47.4635	3.49788	0.285887	118549	1894.1	712.4	218.8	62.5885	3.25594	0.307131	98768	3382.3	1288.8	157.9	29.2014	8.16213	0.122517	29722.1	1233.2	362.7	162	24.1016	2.23889	0.44665	402757	10677.7	1687.7	970.1	37.7195	1.73972	0.574806	295077	4456.9	1055.9	485.9	66.2068	2.17308	0.460176	970175	11019	2945.5	654.2	88.0456	4.50245	0.222102
	88375.6	2290.4	907.7	137.8	38.5852	6.58708	0.151812	953887	11247.6	3280.4	857.3	84.808	3.82643	0.26134	17053.6	747.3	318.8	70.9	22.8203	4.49647	0.222396	904642	7861.5	1815	830	115.072	2.18675	0.4573	41239.9	1253.8	444.7	126.2	32.8919	3.52377	0.283787	34598.9	1504.9	673.4	69.5	22.9908	9.68921	0.103208	9236.5	496.4	155	89.7	18.607	1.72798	0.57871
	238244	3664.4	1125.4	335.2	65.0157	3.3574	0.29785	105992	2207.6	846.5	261.1	48.0123	3.24205	0.308447	17748.1	1253.4	629.6	37.5	14.16	16.7893	0.0595616	72609.6	1365.6	383.8	280	53.1705	1.37071	0.729547	7954	543.7	177.7	68.7	14.6294	2.58661	0.386607	50283.8	1421.5	372.7	204.4	35.3738	1.82339	0.54843	39962.4	1257.5	451.8	121.4	31.7792	3.72158	0.268703
	948579	11283.6	2178.1	1242.7	84.067	1.75272	0.570543	55733.5	1326.4	474.2	155.3	42.0186	3.05344	0.327499	23228.2	980.4	390.3	81.4	23.6926	4.79484	0.208558	15208.3	721.9	259.3	109.4	21.067	2.3702	0.421905	31440.7	1479.6	661.4	67.1	21.2495	9.85693	0.101451	2.10882e+06	18746.2	5377.7	2112.2	112.493	2.54602	0.39277	295224	3976.2	1138	374.7	74.2478	3.0371	0.329262
	302098	4874	1846.7	258.1	61.9816	7.15498	0.139763	25605.8	932.8	222.7	173.2	27.4505	1.2858	0.777728	39288.2	1357.6	606.6	102.8	28.9395	5.90078	0.169469	533949	8303.9	2283.8	431.6	64.301	5.29147	0.188983	21499.5	877.3	358.4	80.9	24.5064	4.43016	0.225725	146552	2486.6	766.4	294.8	58.9369	2.59973	0.384656	63839.5	2370.8	411.4	243.2	26.9274	1.69161	0.591152
	145554	2229.5	485.3	398.7	65.2854	1.21721	0.821554	13287	583.5	222.1	81.5	22.7712	2.72515	0.366952	62354.1	2702.3	1058.8	146.6	23.0745	7.22237	0.138459	100740	1696	397	336.5	59.3986	1.17979	0.847607	278236	3963	1620.3	228.5	70.2085	7.09103	0.141023	157857	3168.4	867.3	360.4	49.8224	2.40649	0.415542	747185	7126.8	1662.3	661.7	104.842	2.51217	0.398063
	14341.5	688.5	238.7	82.5	20.8301	2.89333	0.345622	35476	868.5	275.4	168	40.8474	1.63929	0.610022	29458.5	984.3	416	97.6	29.9284	4.2623	0.234615	582560	6897.4	1966.9	736	84.4608	2.67242	0.374193	49873.2	1687.7	751	88.6	29.551	8.4763	0.117976	38512.6	898.4	324.6	157.8	42.868	2.05703	0.486137	23182.6	846.8	289.9	110.9	27.3767	2.61407	0.382546
	167489	2644.7	542.6	420.5	63.3302	1.29037	0.774972	196111	2016.3	658	398.1	97.263	1.65285	0.605015	1.09481e+06	13578.5	2695.9	1115.8	80.6284	2.41611	0.413888	43876	1196.8	440.9	137.6	36.6611	3.20422	0.312089	219694	8148.8	3437	421.1	26.9603	8.16196	0.12252	183230	2680	1058.4	230	68.3694	4.60174	0.217309	821716	6930.1	1975.2	641.4	118.572	3.07951	0.324727
	109743	3501.3	716	561.2	31.3436	1.27584	0.783799	19461.6	1058.2	432.2	59.5	18.3912	7.26387	0.137668	358714	6384.3	1598.7	527.6	56.1869	3.03014	0.330018	563945	5478.6	1761	484.7	102.936	3.63318	0.275241	99219.1	2287.4	828.9	202.1	43.3764	4.10143	0.243817	166972	2332	736.3	318.1	71.6004	2.31468	0.432025	36641.9	1144.7	344.4	154.2	32.01	2.23346	0.447735
	493627	4748.2	1795.3	368.5	103.961	4.87191	0.205258	137204	2328.8	1027.2	185	58.9164	5.55243	0.180101	363869	7680.5	1713	578.7	47.3757	2.96008	0.337828	75661.4	1418.9	481.4	208.3	53.324	2.31109	0.432696	224085	6641.8	1577	424.9	33.7385	3.71146	0.269436	600481	6808.4	2445.8	453.9	88.197	5.38841	0.185583	860072	11835.5	2207.2	634.7	72.6688	3.47755	0.287559
	21007.8	957.6	375.4	74.5	21.938	5.03893	0.198455	235187	5001.1	1335.1	775.4	47.027	1.72182	0.58078	19233.5	709.4	288.3	88.3	27.1123	3.26501	0.306278	25605.8	950.6	345.7	106.4	26.9365	3.24906	0.307781	173253	3061.8	1028.1	271.1	56.5854	3.79233	0.26369	423096	5761.1	1112.2	678.3	73.4401	1.63969	0.609872	59571	2257.3	816.2	169	26.3904	4.82959	0.207057
	419263	9863.8	2083.8	1189.2	42.5052	1.75227	0.570688	47242.1	2066.5	744.7	159.1	22.8609	4.6807	0.213643	313809	5521.3	1561.5	533.3	56.836	2.928	0.341531	17023.2	706.6	218	114.2	24.0917	1.90893	0.523853	212263	4065.9	1260.7	283.4	52.2056	4.44848	0.224796	31851.3	997.7	440.8	97	31.9247	4.54433	0.220054	23116.7	751.4	250.4	125.9	30.7648	1.98888	0.502796
	75119	1936.7	657.9	179.3	38.7871	3.66927	0.272534	108004	3359.5	1173.5	268.1	32.149	4.3771	0.228462	10838.5	467.4	155.3	92.5	23.1889	1.67892	0.595621	201475	2693.6	829.2	338.1	74.7976	2.45253	0.407742	606767	5143.4	1845.4	437.8	117.97	4.21517	0.237239	262186	3825.1	934.8	418.7	68.5437	2.23262	0.447903	39724.2	1127.3	365.8	158	35.2384	2.31519	0.43193
	7979.3	422.4	151.4	69.3	18.8904	2.1847	0.457728	348580	5869.3	2213.2	281.1	59.3904	7.87335	0.127011	8542	542.8	246.7	46.8	15.7369	5.27137	0.189704	217611	4377	1586.8	264.5	49.7169	5.99924	0.166688	30264.6	854.5	262.4	156.5	35.4179	1.67668	0.596418	703487	4141.9	1262	752.3	169.846	1.67752	0.596117	343845	4529.5	1186.8	495.1	75.9124	2.39709	0.417172
	251825	4550.6	1143.7	361.6	55.3388	3.16289	0.316167	337960	4199	1695.3	270.5	80.4857	6.26728	0.159559	7847.5	775.1	376.4	34.9	10.1245	10.7851	0.0927205	17261.5	737.6	286.9	80.3	23.4023	3.57285	0.279888	26452.4	772	261.2	144.3	34.2648	1.81012	0.55245	17864.7	818.5	310.3	87.8	21.8261	3.53417	0.282952	61193.2	2031.2	703.9	152.5	30.1266	4.61574	0.21665
	275676	4675.2	1026.5	641.7	58.9657	1.59966	0.625134	122001	1722.9	522.3	307.8	70.8115	1.69688	0.589316	224992	3212.9	1071.8	297.5	70.0277	3.60269	0.27757	15451.7	602.4	190.7	112.9	25.6502	1.68911	0.592029	32444.4	953.9	329.9	148.6	34.0124	2.22005	0.45044	388005	3107.7	1109.4	458.1	124.853	2.42174	0.412926	17109.4	666.4	258.8	92.9	25.6744	2.78579	0.358964
	28140.5	781.4	267.5	137.3	36.0129	1.94829	0.513271	1.15801e+06	8083.4	2928.9	699.2	143.258	4.18893	0.238724	71134.4	1765.8	396.7	265	40.2845	1.49698	0.668011	64817.9	1341	388.6	232.9	48.3355	1.66853	0.599331	100476	2142.8	562.3	303	46.8902	1.85578	0.538858	194920	2620.2	997	263.6	74.3913	3.78225	0.264393	1.18989e+06	12055.9	2643	1558.4	98.6981	1.69597	0.589633
	33108.5	978.3	397.1	114.2	33.8429	3.47723	0.287585	160473	2270.7	693.3	309.5	70.6712	2.24006	0.446416	27679.2	934.4	309.7	123.5	29.6224	2.50769	0.398773	104917	1545.6	417	337.1	67.8812	1.23702	0.808393	15010.6	701.2	265.3	75.6	21.407	3.50926	0.28496	586626	8303.6	2762	904	70.6472	3.05531	0.327299	17839.4	664.4	218.1	119.7	26.8504	1.82206	0.548831
	14017	583.4	219.1	83.9	24.0264	2.61144	0.38293	79098.5	3503.5	1214.9	136.5	22.577	8.90037	0.112355	120835	2307.5	794.4	228.3	52.3663	3.47963	0.287387	103579	1927.4	827.9	180.4	53.7402	4.58925	0.217901	144165	5732.9	2101.4	387.4	25.1469	5.42437	0.184353	8998.3	450.1	158.6	75	19.9918	2.11467	0.472888	14077.8	636	178.4	109	22.1349	1.6367	0.610987
	287057	4913.2	891.4	642.8	58.4257	1.38675	0.721113	137047	2123.5	628.8	309.7	64.5384	2.03035	0.492525	543145	7180.8	1490.1	705.4	75.6385	2.11242	0.473391	12506.3	657.6	218.4	84.7	19.0181	2.57851	0.387821	11614.1	471.8	172.4	88.8	24.6166	1.94144	0.515081	133661	2955.7	1336.2	173.5	45.2214	7.70144	0.129846	459459	7379.5	2150.6	557.4	62.2615	3.85827	0.259183
	465598	5276.5	1487.3	593.4	88.2399	2.5064	0.398978	9657.3	532.9	165.5	79.6	18.1222	2.07915	0.480967	33980.5	2545.6	950.9	217.4	13.3487	4.37397	0.228626	75783.1	3161.2	1078.2	110.7	23.9729	9.73984	0.102671	649284	10826.4	2294.4	968.1	59.9723	2.37	0.42194	14889	829.9	332.1	60.2	17.9407	5.51661	0.181271	132287	3503.6	1067.8	256.9	37.7575	4.15648	0.240588
	109186	3160.3	889.7	207.6	34.5492	4.28565	0.233337	919769	7836.9	2989.8	692.9	117.364	4.31491	0.231755	150218	2924.9	666.9	327.8	51.3582	2.03447	0.491528	53036.5	1768.1	624.7	177.3	29.9963	3.52341	0.283816	17403.4	710.4	236.8	102.6	24.498	2.30799	0.433277	136221	2015.3	777.9	234.2	67.5934	3.32152	0.301067	351262	5990.4	1136.6	701.3	58.6374	1.6207	0.617016
	52914.8	1552.6	581.4	143.6	34.0814	4.04875	0.24699	130036	2207.8	873.7	198.8	58.8986	4.39487	0.227538	556255	13225.2	2155.7	643.5	42.0602	3.34996	0.298511	419694	8503	2281.6	666.8	49.3584	3.42172	0.292251	56133.9	1300.5	474.2	157.1	43.1633	3.01846	0.331295	75139.3	1398.7	523.4	196.2	53.7208	2.66769	0.374857	33103.5	1433.2	589.2	89.3	23.0976	6.59798	0.151561
	176026	3576.4	1201.8	314	49.2189	3.82739	0.261275	372422	3783.4	997.8	514.1	98.4357	1.94087	0.515234	20992.6	902.4	224.5	151.8	23.2631	1.47892	0.676169	15811.6	691.2	235.6	97.2	22.8756	2.42387	0.412564	33199.8	1058.2	407.7	116.2	31.3738	3.50861	0.285013	155105	4053.4	821.2	472.2	38.2653	1.73909	0.575012	44261.3	1568.7	611.6	119.2	28.2153	5.13087	0.194899
	167064	3617.3	1571.6	142.3	46.1846	11.0443	0.0905447	13631.7	622.3	235.1	76.2	21.9054	3.0853	0.324117	447540	4985.4	1035.7	695.4	89.7702	1.48936	0.67143	485551	5215.4	1089	772.5	93.0995	1.40971	0.709366	161822	2396.4	980.8	215.5	67.527	4.55128	0.219719	10524.2	675.7	241.1	59.2	15.5753	4.07264	0.245541	420024	5614.5	1252.4	536.7	74.8105	2.33352	0.428537
	59520.3	2034	635.1	227.5	29.2627	2.79165	0.358211	285993	3399.5	1110.8	344.2	84.1278	3.22719	0.309867	395275	5994	1227.5	586.8	65.945	2.09185	0.478045	76573.9	1451.9	391.4	269.1	52.7405	1.45448	0.687532	23030.5	1189.1	550.1	57	19.368	9.65088	0.103618	63804	1658.1	687.9	123.4	38.4802	5.57455	0.179387	9637	446.7	152.8	85.6	21.5738	1.78505	0.560209
	232703	3166.5	868.2	407	73.4889	2.13317	0.468786	122954	2110.6	592.6	321.5	58.2556	1.84323	0.542524	54085.9	3571.5	836	410.5	15.1437	2.03654	0.491029	292116	4051.5	1056.5	432.4	72.1008	2.44334	0.409276	454557	6354.2	1849.3	508.3	71.5364	3.63821	0.274861	188081	3005.5	694.8	416.5	62.5791	1.66819	0.599453	239399	5345.5	1374.6	306.5	44.7852	4.48483	0.222974
	73978.4	2347.1	1024.4	149.4	31.5191	6.85676	0.145841	217286	3291.8	935.8	329.5	66.0084	2.84006	0.352105	937335	13683.5	4127.8	833.9	68.5011	4.94999	0.20202	307370	5434.1	1723.3	479.9	56.5633	3.59096	0.278477	7903.3	479	195.1	53	16.4996	3.68113	0.271656	20156.1	1158.3	224.7	205.6	17.4015	1.0929	0.914998	276107	3085.4	935	450.3	89.4883	2.07639	0.481604
	2.71899e+06	19593.4	5022.2	1465.1	138.77	3.42789	0.291725	86276.8	1427.3	496.7	239.6	60.4476	2.07304	0.482384	158658	2853.1	1035	256.3	55.6091	4.03824	0.247633	509651	8215.8	2451.7	444.3	62.0331	5.51812	0.181221	27912.4	1164.9	468.5	93.5	23.9612	5.0107	0.199573	72944.2	1308.2	350.1	281.5	55.7592	1.24369	0.804056	600683	6235.7	2153.8	585.4	96.3297	3.67919	0.271799
	333554	6442.6	1359.6	364.8	51.7732	3.72697	0.268314	31506.6	1074.1	472.5	88	29.333	5.36932	0.186243	20810.1	1198.1	470.1	70.7	17.3693	6.64922	0.150394	335100	4141.9	835	652.8	80.905	1.27911	0.781796	23785.8	917.6	395.7	80.4	25.9218	4.92164	0.203184	53361	1843.1	513.4	282.7	28.9518	1.81606	0.550643	688719	7645	1637.3	655.8	90.0875	2.49665	0.400537
	2.72722e+06	17781.1	3000.9	2132.4	153.377	1.40729	0.710587	113758	1767.5	410.2	365.8	64.3611	1.12138	0.89176	8638.3	778.9	358.7	39.1	11.0904	9.17391	0.109005	29919.9	790.6	236.4	168.8	37.8445	1.40047	0.714044	142902	5536.3	721.7	592.4	25.8119	1.21826	0.82084	226183	6336.3	2136	334.1	35.6964	6.3933	0.156414	13804.1	801	198.1	105.1	17.2336	1.88487	0.53054
	1.10776e+06	8528.2	2542.8	634.9	129.894	4.00504	0.249685	10230.1	608.9	167.4	116.8	16.801	1.43322	0.69773	124901	3292.2	1423.7	134.4	37.9384	10.593	0.0944019	228546	4614.1	2044.2	157.8	49.532	12.9544	0.077194	151708	2485.4	802.4	253.4	61.0397	3.16654	0.315803	525853	7617	3105.9	427.1	69.0368	7.27207	0.137512	256833	3520	1038.7	370.3	72.964	2.80502	0.356503
	80355.7	1444.9	516.5	203.6	55.6133	2.53684	0.394192	413160	4189.7	1317.7	419.6	98.6132	3.14037	0.318434	110448	2055.9	622.5	243.8	53.7224	2.55332	0.391647	66359	1744.9	624.9	151.6	38.0303	4.12203	0.242599	373106	6826.5	988.5	914.8	54.6555	1.08056	0.925443	200689	3345.4	1093.6	313.1	59.9896	3.49281	0.286302	7923.5	493.4	164.1	77.2	16.059	2.12565	0.470445
	57685.2	1398.3	433.2	190.9	41.2538	2.26925	0.440674	15431.4	819.9	186.7	116.5	18.8211	1.60258	0.623996	951915	6577.4	2687.1	483.7	144.725	5.5553	0.180008	43064.9	1591.2	698.4	82.8	27.0644	8.43478	0.118557	33995.7	1126.9	464.5	98	30.1675	4.7398	0.21098	82429.1	2081.9	660.1	214	39.5932	3.08458	0.324193	303046	3599.2	1165.2	364.7	84.1982	3.19495	0.312993
	47363.8	1256.2	440.4	148.1	37.704	2.97367	0.336285	9490	514.2	158.5	84.5	18.4559	1.87574	0.533123	22848	1844.1	468.7	129.4	12.3898	3.6221	0.276083	41027	1058.4	300.4	200.4	38.7632	1.499	0.667111	68969.8	2225.6	1116	96.6	30.9893	11.5528	0.0865591	206017	5062.6	1546.8	274.9	40.6939	5.62677	0.177722	690220	5812.9	1965.1	524.8	118.739	3.74447	0.26706
	33990.6	915.8	322.7	142.5	37.1157	2.26456	0.441587	97414.4	1700.5	529.6	245.6	57.2857	2.15635	0.463746	8790.4	472.5	184	64.3	18.604	2.86159	0.349457	567580	5628	1403.3	612.6	100.849	2.29073	0.436542	48859.3	1338.1	464.7	158.1	36.5139	2.93928	0.340219	20946.9	894.3	267.2	111.4	23.4227	2.39856	0.416916	11690.1	702.6	268.5	68.5	16.6383	3.91971	0.255121
	9140.2	472.5	184.3	64.9	19.3443	2.83975	0.352143	379002	3283.4	960.4	536.2	115.43	1.79112	0.558309	15000.5	1250.6	537.6	47.6	11.9946	11.2941	0.0885417	111355	2409.4	999.7	164.9	46.2171	6.06246	0.164949	63829.4	1588.7	703.5	119.5	40.1771	5.88703	0.169865	13621.6	672.7	269.2	69.3	20.2491	3.88456	0.257429	40129.7	1830.2	540	167.8	21.9264	3.21812	0.310741
	14326.2	1063.4	380.7	59.5	13.4721	6.39832	0.156291	179058	4345.2	1754.9	232.9	41.2082	7.53499	0.132714	10777.6	652.1	230.9	68.5	16.5275	3.3708	0.296665	301049	5156.2	1667.5	351.3	58.3858	4.74666	0.210675	339105	7505.8	2620.6	353.1	45.1791	7.42169	0.13474	49117.8	2126.8	971.4	136.2	23.0947	7.13216	0.14021	50035.4	1332.2	323.4	222	37.5585	1.45676	0.686456
	167084	2429.9	890.1	253.4	68.7616	3.51263	0.284687	128313	3348	1436.8	180.8	38.3252	7.9469	0.125835	27496.7	944.4	303.5	142.7	29.1155	2.12684	0.470181	162075	2760.1	1113.3	252.2	58.7208	4.41435	0.226534	1.17514e+06	15074.4	2918.6	1068	77.9558	2.73277	0.365929	58962.7	2402.5	1119.9	132.1	24.5422	8.47767	0.117957	18016.8	669	219.2	111.1	26.9309	1.973	0.506843
	523521	5967.4	1763.6	443.5	87.7302	3.97655	0.251474	12840.9	495.3	187.2	88.2	25.9255	2.12245	0.471154	26315.5	1889.4	852	160.7	13.928	5.3018	0.188615	34472.2	1622.3	722.7	99.5	21.249	7.26332	0.137678	8065.5	581.9	163.7	90.1	13.8606	1.81687	0.550397	37797.8	1134.6	419.7	141.6	33.3138	2.96398	0.337384	199315	3214.3	952.7	293.3	62.0089	3.24821	0.307862
	20946.9	1506.6	529	67.4	13.9034	7.84866	0.12741	9307.5	830.4	362.3	33.7	11.2085	10.7507	0.0930168	23628.7	714.5	253.6	132.4	33.0703	1.91541	0.522082	589404	4969.1	1804.4	460.7	118.614	3.91665	0.25532	188203	2451.2	949.4	256.9	76.78	3.6956	0.270592	12045	636.2	225.3	75.1	18.9327	3	0.333333	269659	2994.3	1103.2	344.5	90.0574	3.20232	0.312273
	543363	8112.1	2360.9	501.2	66.9818	4.71049	0.212292	30898.3	857.2	307.4	141	36.0456	2.18014	0.458686	863438	11289.3	3101.3	518	76.4828	5.98707	0.167027	259069	3829.9	1302	341.9	67.6438	3.80813	0.262596	244712	6302.1	1358	321.1	38.8302	4.22921	0.236451	123177	1713.7	458.5	364.5	71.878	1.25789	0.794984	425154	5805	1697.5	452.5	73.2393	3.75138	0.266568
	183706	4176.9	936.7	370.8	43.9815	2.52616	0.395858	105003	1724.6	432.5	348.2	60.8857	1.2421	0.805087	364011	4531.9	1415.7	432.1	80.322	3.27632	0.30522	62303.5	1485.5	521.1	186.7	41.9411	2.79111	0.358281	9692.8	560.8	247.9	52.9	17.2839	4.6862	0.213392	325854	4395.9	1764.9	275.4	74.1267	6.4085	0.156043	267195	5056.2	1215.4	489.1	52.845	2.48497	0.402419
	739718	4188.5	1381.9	716.3	176.607	1.92922	0.518344	13799	816.2	252.6	117.9	16.9064	2.14249	0.466746	10559.6	647.4	310.8	45.7	16.3108	6.80088	0.14704	31526.9	1064.8	367.1	116.1	29.6083	3.16193	0.316263	9905.7	566.9	227.6	58	17.4735	3.92414	0.254833	17738	663.3	246.2	96	26.742	2.56458	0.389927	15948.5	691.1	231.1	108.3	23.077	2.13389	0.468628
	995512	6382.6	1886.9	752.9	155.973	2.50618	0.399014	182682	2480.7	753.4	331	73.6415	2.27613	0.439342	383164	5920	2126.1	332	64.7236	6.40392	0.156154	32120	1213	541.1	110	26.4798	4.91909	0.20329	77765.3	2207	765.2	140.3	35.2357	5.45403	0.183351	63368	1376.1	402.3	211.3	46.049	1.90393	0.52523	1.90212e+06	14125.6	2502.2	1212.7	134.658	2.06333	0.484654
	535430	6455.7	2222.5	357.4	82.939	6.21852	0.16081	80376	2159.9	961.3	110.7	37.2128	8.68383	0.115157	61091.9	2199.1	561.1	247.1	27.7804	2.27074	0.440385	9515.3	471.8	176.9	71.2	20.1681	2.48455	0.402487	255054	5884.7	1548.8	357.2	43.3419	4.33595	0.23063	732083	7861.5	2460.2	797.9	93.1226	3.08334	0.324323	180736	3328.8	974.6	286.6	54.2946	3.40056	0.294069
	1.17794e+06	9212.6	2645.3	649.3	127.861	4.07408	0.245454	129078	1771.1	601	279.6	72.8802	2.1495	0.465225	48195.2	1398	588.4	112.5	34.4744	5.23022	0.191196	302874	4434.6	1781.3	232.6	68.2979	7.65821	0.130579	9586.3	549.6	215.6	65	17.4423	3.31692	0.301484	38248.9	1230.4	357.7	187	31.0866	1.91283	0.522784	104126	1891.1	690.9	197.7	55.0613	3.49469	0.286149
	648204	5289.1	1540.6	577.5	122.555	2.66771	0.374854	15603.7	699.2	271.7	75.2	22.3165	3.61303	0.276776	117160	2536.3	834.3	216.4	46.1932	3.85536	0.259379	271788	3511.6	1315.6	294.2	77.3972	4.47179	0.223624	269441	2999.4	1154.6	314.6	89.8316	3.67006	0.272475	51510.6	1485.9	629.6	115.1	34.6663	5.47003	0.182814	700987	4631.6	1061.8	872.2	151.349	1.21738	0.821435
	802503	6762.7	2234.4	512.8	118.666	4.35725	0.229502	317063	4065.4	1308.2	373.6	77.9907	3.50161	0.285583	164529	2270.8	725.6	325.5	72.4541	2.22919	0.448594	162293	3143.4	1291.7	172.2	51.6298	7.50116	0.133313	52661.4	1258	472.4	148.8	41.8612	3.17473	0.314987	69319.6	1342.1	513	184.4	51.6501	2.782	0.359454	16409.8	820	265.6	86.1	20.012	3.08479	0.324172
	32728.3	1897.2	931.7	58	17.2508	16.0638	0.0622518	49087.4	985.6	297.3	223.3	49.8046	1.33139	0.751093	139455	2094.4	642.9	295.4	66.5848	2.17637	0.45948	48697.1	1390.5	382.9	190.9	35.0213	2.00576	0.498564	10144	495.7	205.1	66.2	20.464	3.09819	0.322769	343419	4763.1	1926.2	288.1	72.1	6.68587	0.149569	29524.4	851.4	247.5	172.4	34.6775	1.43561	0.696566
	162258	2913	819.1	286.5	55.7012	2.85899	0.349774	15689.9	601	232.4	89.4	26.1063	2.59955	0.384682	214437	3043.9	797	404.6	70.4482	1.96985	0.507654	1.2536e+06	10355.6	3581.1	1116.9	121.055	3.20629	0.311887	537112	7588.9	2758.6	312.4	70.7761	8.83035	0.113246	10032.4	742.4	271	51	13.5135	5.31373	0.188192	46441.2	1145	320.5	204.9	40.56	1.56418	0.639314
	1170367	8916.8	2649.6	633.1	131.254	4.18512	0.238942	17418.6	821.6	245.9	121.4	21.2008	2.02554	0.493697	20784.7	791.6	324.5	86.2	26.2566	3.7645	0.265639	544058	4124.6	1214.2	606.4	131.906	2.00231	0.499423	350202	6586.7	1342.8	474.8	53.1681	2.82814	0.35359	333427	4093.8	1188.4	501.8	81.4469	2.36827	0.422248	901190	14701.9	2391.6	908.8	61.2975	2.6316	0.379997
	343429	7283.7	1592.9	1007.7	47.1504	1.58073	0.63262	19274	723.7	246.8	107.6	26.6326	2.29368	0.435981	41457.9	1472	455	124.6	28.1643	3.65169	0.273846	201150	3839.4	1222.5	261.6	52.3911	4.67317	0.213988	250121	5384.8	1312	317.5	46.4495	4.13228	0.241997	580319	9224.4	2727	502.3	62.9113	5.42903	0.184195	28677.8	749.2	255.5	145	38.2779	1.76207	0.567515
	544194	6212.4	2009.8	389.7	87.5981	5.1573	0.1939	397211	3910.3	1458.9	364.4	101.581	4.00357	0.249777	47191.4	2050.4	585.5	130.1	23.0157	4.50038	0.222203	734613	8465.4	2183.2	911.4	86.7783	2.39544	0.417461	88634.1	1776.7	687	173.5	49.8869	3.95965	0.252547	80609.2	1435.3	560.4	190.2	56.1619	2.94637	0.3394	926720	7637.7	1519.8	1030.8	121.335	1.47439	0.678247
	99883.2	1567.9	533.1	248.1	63.7051	2.14873	0.465391	362719	3050.3	940.3	527.5	118.912	1.78256	0.560991	34588.8	1398.4	623.1	84	24.7346	7.41786	0.13481	112861	2058.8	814.1	188.9	54.8188	4.30969	0.232035	70972.2	1713.9	493	229.6	41.4098	2.14721	0.46572	819004	10519	2889.8	926.1	77.8595	3.1204	0.320472	12181.9	503.7	170.2	92.3	24.1848	1.84399	0.542303
	49523.4	1605.5	517.1	217.8	30.8461	2.3742	0.421195	165913	3124.9	712.5	365.9	53.0938	1.94725	0.513544	73441	2543.2	938.9	124.2	28.8774	7.55958	0.132282	207031	3399.6	1195.6	268.7	60.8986	4.44957	0.224741	181222	3830.9	1429.8	179.2	47.3054	7.97879	0.125332	1.68835e+06	12260.3	2751.2	1088.7	137.709	2.52705	0.395718	18559.2	757.4	198.3	134.5	24.5038	1.47435	0.678265
	509839	5545.3	1597.8	704.8	91.9407	2.26703	0.441107	9733.3	466.2	169.4	74.7	20.8779	2.26774	0.440968	14437.8	1124.2	410.6	61.2	12.8427	6.70915	0.14905	506052	7715.1	2812.6	365.9	65.5924	7.6868	0.130093	7847.5	638.9	285.9	36.8	12.2828	7.76902	0.128716	38862.3	1319.6	439.9	147.5	29.4501	2.98237	0.335303	8886.7	524.1	217.2	55.6	16.9561	3.90647	0.255985
	203335	2603.4	866.7	308	78.1037	2.81396	0.355371	8055.3	459.8	178.7	58.5	17.5191	3.0547	0.327364	32926	1583.7	585	120.4	20.7906	4.8588	0.205812	25580.4	910.1	296.2	137.8	28.1072	2.14949	0.465226	1.35919e+06	23366.2	5226.9	1439	58.169	3.63231	0.275307	197298	3583	1102	310.9	55.0649	3.54455	0.282123	26503	874.1	306.3	114	30.3203	2.68684	0.372184
	673881	6579.5	1789.3	719.9	102.421	2.48548	0.402336	764751	6072.2	2507	414.1	125.943	6.05409	0.165178	180305	7261.4	2381.3	854	24.8306	2.78841	0.358628	400821	7565.2	1464.6	502.3	52.9822	2.91579	0.342961	86114.6	2485.5	777.5	195.2	34.6468	3.98309	0.251061	1.51604e+06	11911.2	2511.2	1664.8	127.278	1.50841	0.66295	424429	4253.7	1197.8	523.2	99.7788	2.28937	0.436801
	116886	2095.9	713.6	225.7	55.7689	3.16172	0.316284	57923.5	1565.3	482.1	198.1	37.0047	2.43362	0.410911	9348.1	674.6	279	48.2	13.8572	5.78838	0.17276	28257.1	1226.5	268.9	169.3	23.0388	1.5883	0.629602	15137.4	562.5	200.2	103.9	26.9109	1.92685	0.518981	26102.6	931.2	331.5	106.8	28.0311	3.10393	0.322172	321301	3892.4	1023.1	547.6	82.5458	1.86833	0.535236
	580436	5164.9	1538.4	545.4	112.381	2.82068	0.354524	51302.8	1561.8	694.2	102.3	32.8485	6.78592	0.147364	331445	4768.7	1336.3	408.2	69.5043	3.27364	0.30547	24744	1000.6	215	179.2	24.7292	1.19978	0.833488	11056.5	459.5	157.1	91.6	24.062	1.71507	0.583068	82429.1	1533.8	441.8	268.7	53.7418	1.64421	0.608194	1.10431e+06	6968.3	2015.4	728.4	158.476	2.76689	0.361417
	180721	2668.1	578.5	423	67.7338	1.36761	0.731201	20328.5	618.4	183.5	143.5	32.8727	1.27875	0.782016	86535.4	2186.8	616.1	318.1	39.5717	1.93681	0.516312	79656.2	2443.7	516.8	377.8	32.5966	1.36792	0.731037	377090	9574	2259.5	289.5	39.3869	7.80484	0.128126	148748	2640.5	724	291.1	56.3331	2.48712	0.402072	21844.2	921.3	212.8	147.9	23.7102	1.43881	0.695019
	200821	2610.1	904.7	304.4	76.9399	2.97208	0.336465	19106.7	879.6	393.9	64.5	21.722	6.10698	0.163747	104978	3162.9	886.7	341.9	33.1904	2.59345	0.385587	892612	7387.4	2700.9	447.8	120.829	6.03149	0.165797	13388.4	648.3	272.3	64.6	20.6516	4.21517	0.237238	73638.7	1235.2	436.2	219.3	59.6168	1.98906	0.502751	120242	2579.6	1002.1	181.9	46.6127	5.50907	0.181519
	201576	3664.1	857.4	337.3	55.0139	2.54195	0.393399	162795	2210	612.4	364.9	73.6629	1.67827	0.595852	16972.5	758.9	232.6	120.7	22.3646	1.92709	0.518917	10377.1	754.4	254.4	72.8	13.7554	3.49451	0.286164	9221.3	1279	324.5	178.4	7.20977	1.81895	0.549769	12141.3	697.3	230.3	71.2	17.4119	3.23455	0.309162	162567	2284.1	604	388.2	71.1733	1.5559	0.642715
	11036.2	628.5	250.9	60.5	17.5596	4.14711	0.241132	468477	6385.4	1000.8	761.1	73.3669	1.31494	0.760492	76913.6	1327.1	356.7	313.8	57.9561	1.13671	0.879731	296557	3710.3	1246.3	387.4	79.9281	3.21709	0.31084	64959.8	2057.4	899.7	117.9	31.5737	7.63104	0.131044	112349	2208.9	907.9	166	50.862	5.46928	0.18284	17378	1126.8	416.2	62	15.4224	6.7129	0.148967
	54461	1628.9	579.3	149.9	33.4342	3.86458	0.258761	86540.5	2284	1010	115	37.8899	8.78261	0.113861	118453	2477.3	665.3	258.4	47.8152	2.57469	0.388396	43931.8	2265.6	808.8	85	19.3908	9.51529	0.105094	295067	7148.3	3181.4	205.2	41.2779	15.5039	0.0644999	19015.5	846	203.4	143.8	22.477	1.41446	0.706981	9287.2	513.2	151.4	94.1	18.0966	1.60893	0.621532
	33062.9	1376	593.9	74.4	24.0283	7.98253	0.125274	251181	2939.9	1122	301.4	85.4385	3.72263	0.268627	358587	6175.9	1589.8	422.5	58.0623	3.76284	0.265757	103741	2429.3	1022	185.5	42.7041	5.50943	0.181507	13702.7	914.3	357.8	61.7	14.9871	5.79903	0.172443	205804	4746.2	1067	511	43.3619	2.08806	0.478913	291995	4872.9	1189.7	460.4	59.9222	2.58406	0.386988
	170896	2915.2	653.5	432.3	58.6224	1.51168	0.661515	251551	3042.7	887.5	402.6	82.6735	2.20442	0.453634	319213	4272.5	848.5	544.5	74.7133	1.55831	0.641721	263352	4614.7	1004.7	472.2	57.0682	2.1277	0.469991	58410.1	1913.6	635	265.9	30.5237	2.38812	0.41874	64371.8	1408.2	455.5	186.9	45.7121	2.43713	0.410318	89333.7	1976.3	714	176.7	45.2025	4.04075	0.247479
	11867.6	671.9	233.4	79.1	17.6627	2.9507	0.338903	13824.4	630.4	239	78.5	21.9296	3.04459	0.328452	177207	3772.8	968.3	337.5	46.9697	2.86904	0.348549	533483	5765.8	1765.7	532.6	92.5254	3.31525	0.301637	62891.5	2219.8	920.3	203.5	28.3321	4.52236	0.221124	161041	3743.3	976.4	284.2	43.0211	3.43561	0.291069	349366	4217.7	1059.6	509.3	82.8332	2.0805	0.480653
	355469	3432.6	1316.3	368.5	103.557	3.57205	0.279951	12126.1	508	168.2	94.9	23.8703	1.77239	0.564209	24617.2	923.5	412.1	79.9	26.6564	5.1577	0.193885	100948	2838.6	754	266.1	35.5625	2.83352	0.352918	2.49853e+06	30282.1	5696	2385.1	82.5083	2.38816	0.418732	778038	11618.4	3665.6	672.3	66.966	5.45233	0.183408	33250.5	1055.4	325	158.2	31.5051	2.05436	0.486769
	63809.1	3569.8	1798.5	174.1	17.8747	10.3303	0.0968029	79909.6	2298.1	786	146.8	34.772	5.35422	0.186768	12977.8	1031.1	505.4	58.3	12.5864	8.66895	0.115354	487883	5257.4	1166.5	759	92.7993	1.53689	0.650664	33204.9	878.1	333.2	137.8	37.8145	2.418	0.413565	15588.5	739	218.8	107.8	21.094	2.02968	0.492687	277501	5008	1385.6	361.3	55.4116	3.83504	0.260753
	16323.6	603.3	197.2	115.9	27.0572	1.70147	0.587728	73385.3	1890.9	730.8	140.3	38.8097	5.20884	0.191981	557598	7094.5	2561.9	304.9	78.5958	8.40243	0.119013	406823	4271	1435.2	392.8	95.2524	3.65377	0.27369	59287.1	1348.3	548.8	141.3	43.9717	3.88393	0.257471	13368.1	624.8	230.1	79.8	21.3958	2.88346	0.346806	574966	6195	1852.4	524.7	92.8113	3.5304	0.283254
	46598.3	1064.8	384.4	160.1	43.7625	2.401	0.416493	402529	6366.9	2385	461	63.2221	5.17354	0.193291	68346.2	1883	456.7	276.6	36.2964	1.65112	0.605649	604972	5933.5	1394.2	654.7	101.959	2.12952	0.469588	68285.4	2254	583.4	268.9	30.2952	2.16958	0.460919	7700.5	543.7	249.6	43.3	14.1631	5.76443	0.173478	538603	6066.4	1514.3	518.2	88.7846	2.92223	0.342204
	210057	2683.7	801.5	351.8	78.2716	2.27828	0.438927	626902	4328.2	1338.5	630.3	144.841	2.12359	0.4709	24809.9	1168.8	517.9	63.5	21.2268	8.15591	0.122611	181648	3338	810.6	492.1	54.4183	1.64723	0.607081	116998	2030.7	772.4	207.6	57.6145	3.72062	0.268773	14676	913.7	397.4	50.4	16.0622	7.88492	0.126824	9571.1	485.2	188.5	66.6	19.7261	2.83033	0.353316
	369877	6380.8	1716.3	417.2	57.9671	4.11385	0.243081	282986	3781.9	1251.3	374.9	74.8265	3.33769	0.299608	62328.8	2738.1	1259.6	232.5	22.7635	5.41763	0.184582	44798.7	1224.6	451	137.9	36.5823	3.27049	0.305765	196532	2671.3	947.8	272.5	73.5717	3.47817	0.287508	309261	5219.7	1626.7	577	59.2489	2.81924	0.354706	572999	8919.3	2835	601.4	64.2426	4.714	0.212134
	39952.3	1277.5	383.5	164.9	31.2738	2.32565	0.429987	220166	2344.8	747.3	398.3	93.8954	1.87622	0.532985	27897.1	1752.5	839.1	134.2	15.9185	6.25261	0.159933	39866.1	1348.1	507.2	111.8	29.5721	4.53667	0.220426	18660.6	1004.3	422.7	65.3	18.5807	6.4732	0.154483	38532.8	1653.9	336.8	209.3	23.2981	1.60917	0.621437	319907	4331	1631.3	303.7	73.8645	5.37142	0.186171
	106337	2067.4	841	170.1	51.4349	4.94415	0.202259	159196	2981.3	845.4	277.5	53.3981	3.04649	0.328247	184573	2821.9	1102.4	225.7	65.4075	4.88436	0.204735	13018.3	572.5	189.9	102.8	22.7394	1.84728	0.541338	10595.1	636.7	258.4	56.6	16.6406	4.56537	0.21904	17048.5	1282.7	529	78.2	13.2911	6.76471	0.147826	21920.3	831.6	281.1	119.3	26.3592	2.35624	0.424404
	57811.9	1805.5	631.3	143.8	32.0199	4.39013	0.227784	400030	3987.6	1432.3	391.3	100.318	3.66036	0.273197	123725	2213.7	885.3	191.2	55.8905	4.63023	0.215972	594691	6592.7	2058.6	485.1	90.2045	4.24366	0.235646	10762.4	526.8	209.4	69.6	20.4298	3.00862	0.332378	20668.1	1035.7	226.3	188.4	19.9557	1.20117	0.832523	24003.8	853.8	228	157.8	28.1141	1.44487	0.692105
	258613	3401.3	1114.2	314.2	76.0335	3.54615	0.281996	752751	4588.4	1314.5	782.9	164.055	1.67901	0.595588	150988	3077.9	761.3	367.3	49.0556	2.07269	0.482464	876512	8429.2	3067.3	401.6	103.985	7.6377	0.130929	65380.6	1476.3	611	141.3	44.2868	4.32413	0.23126	8298.7	442.9	182.9	58.9	18.7372	3.10526	0.322034	12039.9	524.1	151.4	112.4	22.9725	1.34698	0.742404
	14529	557	158	127.6	26.0844	1.23824	0.807595	36261.7	912.7	255.9	194.7	39.7301	1.31433	0.760844	28125.3	916.4	300	127.7	30.6911	2.34926	0.425667	21935.5	851.8	310.9	96.1	25.7519	3.23517	0.309103	174414	3957.9	1111.1	332.1	44.0674	3.34568	0.298893	33868.9	915.7	329.4	133.2	36.9869	2.47297	0.404372	253852	2963.9	843.2	407.2	85.6481	2.07073	0.482922
	82550.8	1842	640.2	191.5	44.8159	3.34308	0.299125	16840.7	644.2	171.6	132.9	26.142	1.2912	0.774476	467616	7208.4	2054.6	540.9	64.8709	3.79848	0.263263	56904.5	1297.9	421.1	188.2	43.8435	2.23751	0.446925	302549	4567.3	2060.9	214.6	66.2425	9.60345	0.104129	246091	2463.2	778	428.8	99.907	1.81437	0.551157	1.05588e+06	8730.6	1784.7	1060.8	120.941	1.68241	0.594386
	11183.2	672.2	282.5	53.5	16.6367	5.28037	0.189381	1.164e+06	10327.7	3066.9	840.9	112.707	3.64716	0.274186	450466	3881.3	1182.3	507.8	116.06	2.32828	0.429502	31689.1	963.7	261	187.2	32.8827	1.39423	0.717241	228242	3259.1	1477	204.9	70.0321	7.20839	0.138727	184087	3015.1	1176.5	215.8	61.0549	5.45181	0.183425	210950	4013.9	771.8	549.7	52.5548	1.40404	0.712231
	38837	1002.5	356.8	146.3	38.7401	2.43882	0.410034	468629	4153.6	1626.2	377.1	112.825	4.31238	0.23189	47622.3	1577.8	433.5	196.8	30.1827	2.20274	0.453979	213733	2990.5	959.5	307.4	71.4706	3.12134	0.320375	69679.5	2214.1	852.3	129.5	31.4708	6.58147	0.151942	15887.6	986.4	355.3	75.9	16.1067	4.68116	0.213622	113089	3496	571.2	455.8	32.3481	1.25318	0.797969
	457978	9028.8	1379.9	652.3	50.7242	2.11544	0.472715	8349.4	523.4	223.5	49	15.9522	4.56122	0.219239	94185.2	1674	465.1	309.3	56.2636	1.50372	0.665018	264828	3384.1	1359.9	265.6	78.2565	5.12011	0.195308	494321	7821.4	2169.6	437.1	63.2011	4.96362	0.201466	97084.9	2077.3	454.2	316.5	46.7361	1.43507	0.69683	14650.7	573	162.6	122.4	25.5684	1.32843	0.752768
	147206	2881	1016.1	256.3	51.0956	3.96449	0.252239	195893	4046.2	813.1	723.9	48.4142	1.12322	0.890296	274074	5670.3	1683.2	354.1	48.3351	4.75346	0.210373	137564	2022.9	495.1	429.2	68.0036	1.15354	0.866896	14660.8	670.3	255.8	75.4	21.872	3.39257	0.294762	84847.3	1595.3	543.6	236.5	53.1858	2.29852	0.435063	47409.4	1622.9	596	188.8	29.2128	3.15678	0.316779
	427364	5883.8	1023.3	740.7	72.634	1.38153	0.723835	173912	3018.9	1345.6	182.8	57.6078	7.36105	0.13585	39024.6	1209.5	370.4	165.1	32.2651	2.24349	0.445734	340930	3867.6	1433.5	330.2	88.1503	4.34131	0.230345	31785.4	1395.7	625.5	67.1	22.7738	9.32191	0.107274	252240	4359.7	1348.9	249.2	57.8573	5.41292	0.184743	105830	1744.4	467.1	328.7	60.6683	1.42105	0.703704
	156068	3140.7	968.5	232.1	49.6921	4.17277	0.239649	366247	4205.1	1891.6	262.3	87.0959	7.21159	0.138666	28510.5	1151.7	358.8	151.2	24.7551	2.37302	0.421405	167140	3367.2	775.7	516.4	49.6375	1.50213	0.665721	54354.6	1280.2	479.4	161.6	42.4579	2.96658	0.337088	200071	2730.1	911	343.3	73.2832	2.65366	0.376839	2.37409e+06	19388	5135.9	1057	122.451	4.85894	0.205806
	363976	5236.5	1526.4	349.6	69.5075	4.36613	0.229036	10965.2	761.3	344.8	44.9	14.4033	7.67929	0.13022	194292	6891.7	2110.3	606.8	28.1921	3.47775	0.287542	111852	2375.6	746.6	233.3	47.0838	3.20017	0.312483	86145	1843	702.5	201.4	46.7417	3.48808	0.28669	25169.8	949.1	349.6	96.3	26.5197	3.63032	0.275458	15203.3	605.1	162.3	134.8	25.1253	1.20401	0.830561
	21438.7	679.3	200.3	143.8	31.56	1.39291	0.717923	31192.3	869.4	329.4	125.5	35.878	2.6247	0.380996	30938.8	1382.9	626.1	78.4	22.3724	7.98597	0.12522	101064	2267.9	940.3	217.5	44.563	4.32322	0.231309	1.32371e+06	22548.3	5354.1	1515.9	58.7054	3.53196	0.283129	100512	2761.8	722.6	253.3	36.3936	2.85274	0.35054	21834.1	1021.6	359	96.7	21.3725	3.71251	0.269359
	34193.4	1430.2	568.8	91.5	23.9081	6.21639	0.160865	1.35781e+06	10099.3	3575.4	837.7	134.446	4.26812	0.234295	60797.8	2339.9	754.5	135.6	25.9831	5.56416	0.179722	161305	2390.1	753.3	289.9	67.4886	2.59848	0.38484	749842	5125.8	1565	638.7	146.288	2.45029	0.408115	268123	5370.9	1356.8	478.4	49.9214	2.83612	0.352594	812748	8952.8	2038	599.5	90.7815	3.3995	0.294161
	42253.8	1169.7	365.7	168.2	36.1236	2.1742	0.45994	348768	4361.5	1589	330.2	79.965	4.81224	0.207804	146618	2550	740.1	321.6	57.4974	2.30131	0.434536	19877.3	609.4	188.5	139.9	32.6178	1.34739	0.742175	24186.3	804.3	297.4	111.5	30.0712	2.66726	0.374916	9287.2	485.3	158.7	79.8	19.137	1.98872	0.502836	12121	509.4	185.7	85.7	23.7947	2.16686	0.461497
	96131.8	3469.8	1359.1	135	27.7053	10.0674	0.0993304	266191	4197.5	1651.8	264	63.4167	6.25682	0.159826	44489.4	2138.3	778.8	105	20.806	7.41714	0.134823	44124.4	1253.5	489.8	120.6	35.201	4.06136	0.246223	20064.9	1035.8	343.9	97.9	19.3714	3.51277	0.284676	9064.2	420.7	153	79.3	21.5455	1.92938	0.518301	31506.6	1015.8	298.3	149.8	31.0165	1.99132	0.502179
	182966	5193.7	1372.7	297.8	35.2285	4.60947	0.216945	941041	10355.9	3365.7	479.8	90.87	7.0148	0.142556	47470.3	2464.7	868.9	155.5	19.2601	5.58778	0.178962	11979.1	560.4	206.6	76.5	21.376	2.70065	0.370281	552564	11980.1	2517.6	1103.2	46.1235	2.28209	0.438195	15259	784.2	315.1	65	19.458	4.84769	0.206284	102854	2520.4	751.9	287.2	40.8086	2.61804	0.381966
	277679	5151.4	1211.5	373.1	53.9035	3.24712	0.307965	28191.2	1530.2	301.2	190.2	18.4232	1.5836	0.631474	31648.5	1649	562	119.1	19.1925	4.71872	0.211922	158775	6609.4	2371.6	199.2	24.0226	11.9056	0.0839939	147794	2894.7	1114	196.3	51.0569	5.67499	0.176212	129494	1716.9	595.7	310.6	75.423	1.9179	0.521403	30097.3	1158.8	394.5	106.5	25.9728	3.70423	0.269962
	269096	3174.5	1017.6	361	84.7681	2.81884	0.354756	163059	2360.5	864.5	254.4	69.078	3.39819	0.294274	92005.3	2220.2	476.4	287.9	41.4401	1.65474	0.604324	274825	4199.8	1460.5	300.4	65.4375	4.86185	0.205683	39338.9	1014.4	399.1	130.2	38.7805	3.06528	0.326234	117854	2849.4	949.3	268.1	41.3611	3.54084	0.282419	21884.8	894.7	365	84.2	24.4605	4.33492	0.230685
	74378.9	1341.4	386.4	274.1	55.4487	1.4097	0.709369	432520	5390.3	1547.6	575.6	80.2404	2.68867	0.371931	10356.9	524.5	231.5	58.8	19.7462	3.93707	0.253996	152352	2271.8	735.2	276.1	67.0622	2.6628	0.375544	454445	5750.4	1820.6	410	79.0284	4.44049	0.2252	87392.1	1601.4	379	332.8	54.5723	1.13882	0.8781	20764.4	683.8	213.9	132.9	30.3662	1.60948	0.621318
	657121	10549.8	3837.6	863	62.2876	4.44681	0.22488	164706	2917.7	882.6	276.7	56.4507	3.18974	0.313506	19380.5	836.6	333.3	79.4	23.1658	4.19773	0.238224	11811.8	536.9	211.8	75.2	22	2.81649	0.355052	173598	3968.8	1419	288.2	43.7407	4.92366	0.203101	481516	8693.9	1329.5	1194.9	55.3855	1.11265	0.898759	626228	8645.3	1486.6	972.9	72.4357	1.52801	0.654446
	120303	2185.4	726.1	219.7	55.0485	3.30496	0.302575	29392.6	1318.2	504.6	99.5	22.2975	5.07136	0.197186	9140.2	605.4	274.4	45.2	15.0978	6.0708	0.164723	106869	3547.6	1569.3	94	30.1243	16.6947	0.0598993	10402.5	699.8	311.1	46.7	14.865	6.66167	0.150113	112983	2480.4	756.3	310.9	45.5502	2.43261	0.41108	10427.8	561	184.6	80.7	18.5879	2.28748	0.437161
	258060	3075.5	741.4	566.9	83.9083	1.30781	0.764634	178556	2179.7	630.6	373	81.9176	1.69062	0.5915	74911.2	2434.6	1031.5	113.8	30.7694	9.06415	0.110325	398985	5194.8	1445.8	433.8	76.8048	3.33287	0.300041	14204.6	767.6	204.8	114.7	18.5052	1.78553	0.560059	10321.4	486.8	181.7	73.3	21.2025	2.47885	0.403412	13717.9	572	177	104.7	23.9823	1.69054	0.591525
	234812	2866	909.2	345.4	81.93	2.63231	0.379894	17874.9	648.4	187.7	135.2	27.5677	1.38831	0.720298	11284.6	485.3	196.3	74.6	23.2528	2.63137	0.380031	19502.1	801.3	326.2	79.4	24.3381	4.10831	0.243409	231192	5017.8	2074.2	172.4	46.0744	12.0313	0.0831164	35176.9	1794.5	488.7	143.8	19.6026	3.39847	0.29425	22842.9	870.9	341	89	26.2291	3.83146	0.260997
	22442.4	731.4	270.8	110	30.6842	2.46182	0.406204	307817	2713.9	727.3	559.2	113.422	1.30061	0.768871	204978	2729.6	904.3	306.2	75.0944	2.9533	0.338604	228368	3844.5	1124.6	461.5	59.4013	2.43684	0.410368	124734	4936	2032.5	272.6	25.2702	7.45598	0.134121	133002	2243.9	761.4	237.6	59.2727	3.20455	0.312057	309768	5705.5	1424	406.5	54.2929	3.50308	0.285463
	8253.1	565.5	208.7	59.2	14.5943	3.52534	0.283661	523232	4078.5	1136	621.8	128.29	1.82695	0.547359	8521.7	671.5	284.3	44.5	12.6905	6.38876	0.156525	266643	3651.8	1027.8	344.3	73.0168	2.98519	0.334987	24845.3	790.1	279.6	116.8	31.4458	2.39384	0.41774	366607	3977.3	1312.3	379.9	92.1748	3.45433	0.289492	49198.9	1437.1	440.2	154.4	34.2348	2.85104	0.35075
	307700	3262.5	948.1	431.7	94.3142	2.1962	0.455332	15603.7	572.1	207.5	97.6	27.2744	2.12602	0.470361	44514.8	2912	954	126.5	15.2867	7.5415	0.1326	18508.5	620.1	179.8	136.1	29.8476	1.32109	0.756952	425818	9044.7	3835.2	603.5	47.0793	6.35493	0.157358	135339	3417	784.5	335.1	39.6075	2.34109	0.427151	40900.3	1425.2	406.7	150	28.6979	2.71133	0.368822
	477572	6243	1940.2	409.5	76.4972	4.73797	0.211061	20967.2	655.5	206.2	134.4	31.9866	1.53423	0.651794	13996.7	933.4	413.5	90.8	14.9954	4.55396	0.219589	637001	6539.5	1856.8	642.5	97.4082	2.88996	0.346025	394945	4703.7	1715.3	316.6	83.9648	5.41788	0.184574	9652.2	541.4	229.9	55.6	17.8282	4.13489	0.241844	95842.9	2999.9	834.2	259.2	31.9487	3.21836	0.310717
	26168.5	1842.6	442.5	126.1	14.2019	3.50912	0.284972	166323	1903.7	564.1	392.4	87.3684	1.43756	0.695621	17646.7	871.3	381.3	61.3	20.2533	6.22023	0.160766	54182.2	1148	285.7	254.1	47.197	1.12436	0.889394	132759	2334.9	960	192.7	56.8584	4.98184	0.200729	394600	3997.5	1355.7	390.6	98.7118	3.47081	0.288117	278586	5332.2	973.3	723	52.246	1.3462	0.742834
	10585	767.3	368.4	41.6	13.7951	8.85577	0.112921	80741	1686.3	589.9	191.8	47.8806	3.0756	0.32514	25768	1826.2	766.3	88.1	14.1102	8.69807	0.114968	24546.2	778.8	250.6	144.1	31.518	1.73907	0.57502	32708	984.1	344	136.6	33.2365	2.5183	0.397093	44200.5	938	287	208.1	47.1221	1.37914	0.725087	18077.6	794	290.1	100	22.7678	2.901	0.344709
	32038.9	1129.1	300.8	150	28.3756	2.00533	0.49867	624535	3989.3	1249.4	701.2	156.553	1.7818	0.561229	137042	3894.3	803.9	458.1	35.1905	1.75486	0.569847	72346	3007.8	1143.5	126.7	24.0528	9.02526	0.1108	16962.4	1064.8	279.9	107.4	15.9301	2.60615	0.383708	13915.6	576.7	170.8	113.6	24.1297	1.50352	0.665105	13302.2	688.8	253.4	71.7	19.3121	3.53417	0.282952
	12734.4	899.4	271.8	122.9	14.1588	2.21155	0.452171	133803	2153.1	697.2	274	62.1443	2.54453	0.393001	525772	7074.6	1801.2	592	74.3183	3.04257	0.32867	73248.4	1438.5	476.2	216.8	50.92	2.19649	0.455271	121378	5171.9	1962.2	109.5	23.4687	17.9196	0.0558047	254907	2929.8	1148.4	293.1	87.0048	3.91812	0.255225	22234.6	996.3	246.3	171.6	22.3172	1.43531	0.696711
	273958	5523.4	1867.1	268	49.5995	6.96679	0.143538	943378	5899.2	2558.1	496.7	159.916	5.15019	0.194168	8978	659.8	201.8	72.2	13.6072	2.79501	0.35778	173780	3192.2	1027.6	276.2	54.4391	3.72049	0.268782	10209.9	495.3	187.4	74.6	20.6136	2.51206	0.398079	255409	2478.3	975	351.3	103.058	2.77541	0.360308	747576	8613.5	1988.6	765.3	86.7911	2.59846	0.384844
	543074	5640.8	1397.3	553.6	96.2761	2.52402	0.396193	259388	5853.1	2670.9	437.8	44.3164	6.10073	0.163915	51475.1	2035.4	400.8	235.7	25.2899	1.70047	0.588074	137782	1866.9	687	262.4	73.8028	2.61814	0.381951	178095	5724.2	1575.7	549.2	31.1126	2.86908	0.348544	42111.9	1285	410.6	175.3	32.7719	2.34227	0.426936	13261.7	710.5	201.7	103	18.6653	1.95825	0.510659
	8080.7	518.4	207	55.2	15.5878	3.75	0.266667	10412.6	560.8	214.3	66.2	18.5674	3.23716	0.308913	50719.8	1600.6	659.6	102.6	31.688	6.42885	0.155549	8116.2	525.5	153.2	77.1	15.4447	1.98703	0.503264	12019.6	723.3	321.9	49.2	16.6177	6.54268	0.152842	282150	4611.8	994.9	519.2	61.18	1.91622	0.521861	15451.7	710.3	271.8	75.6	21.7538	3.59524	0.278146
	73770.5	2341.7	593.2	241.1	31.503	2.46039	0.40644	452519	4355.4	1105.4	610.7	103.898	1.81005	0.55247	48519.6	1302.9	482.4	179.4	37.2397	2.68896	0.371891	105668	2537.1	836	218.4	41.6489	3.82784	0.261244	16328.7	824.3	281.9	98.1	19.8092	2.8736	0.347996	439769	5538.7	1576.9	409.5	79.3993	3.85079	0.259687	501175	4363.9	1177.2	592.4	114.846	1.98717	0.503228
	68391.9	3286.1	784.3	364.9	20.8125	2.14936	0.465256	59849.8	1122.6	358.9	222.5	53.3136	1.61303	0.61995	160924	2475.6	746.2	346.6	65.0042	2.15291	0.464487	82784	2436.3	788.5	199.2	33.9794	3.95833	0.252632	7725.8	472.2	192.6	56	16.3613	3.43929	0.290758	38122.2	992.7	343.8	150.1	38.4025	2.29047	0.436591	12739.5	647	201.8	90.4	19.6901	2.2323	0.447968
	43196.7	1067.8	420.6	135.4	40.4539	3.10635	0.321921	432094	5542.8	1506.9	487.5	77.9559	3.09108	0.323512	9870.2	575.9	249.8	52.7	17.1387	4.74004	0.210969	139161	3218.2	1125.5	222.2	43.242	5.06526	0.197423	28039.1	968.1	353.2	109.2	28.963	3.23443	0.309173	13910.6	550.4	169.8	112.1	25.2736	1.51472	0.660188	474520	4204.2	935.5	768.5	112.868	1.21731	0.821486
								53604.3	1529.9	461.2	169.3	35.0378	2.72416	0.367086	157234	2290.5	787.7	275.7	68.6461	2.85709	0.350006	73314.3	2078.9	820.6	150.1	35.2659	5.46702	0.182915	10118.6	573.5	231.6	59.2	17.6436	3.91216	0.255613	39825.5	1167.8	499.6	112.4	34.103	4.44484	0.22498	8526.8	453	151.8	74.5	18.823	2.03758	0.490777
					54.7156	3.53182	0.370138	11533	670.4	224.6	94.1	17.2032	2.38682	0.418967	90433.8	1898.8	739.1	165	47.6268	4.47939	0.223244	170480	2999.4	981.8	302.3	56.8381	3.24777	0.307904	12967.6	1140.6	511.2	41.4	11.3691	12.3478	0.0809859	8825.9	477.7	183.2	63.8	18.4758	2.87147	0.348253	97972.1	1919.1	677.4	199.8	51.0511	3.39039	0.294951
					34.7722	2.17234	0.183299	691142	5784.8	1465.3	854.1	119.476	1.71561	0.582884	163571	4197.3	1476.7	167.6	38.9704	8.81086	0.113496	315431	3046.1	1040.1	430.1	103.552	2.41827	0.413518	368842	5039.8	1802.7	319.8	73.1859	5.63696	0.177401	118899	1957	685	240.6	60.7556	2.84705	0.351241	187752	2454.9	740.8	351.2	76.4805	2.10934	0.474082
								489272	8770.9	2286.6	516.8	55.7836	4.42454	0.226012	39597.4	1030.9	409.5	127.6	38.4105	3.20925	0.3116	165882	6678.6	1338.1	230.6	24.8379	5.80269	0.172334	18503.5	857.1	365.4	75.1	21.5885	4.86551	0.205528	200542	2922	1194.2	220.9	68.6318	5.40607	0.184977	742430	10647.7	2023.7	944.6	69.7268	2.14239	0.466769
								126102	2414.6	732.3	231.8	52.225	3.15919	0.316537	243430	5779.6	1630.7	248.7	42.1188	6.5569	0.152511	19451.5	809.5	286.4	92.2	24.029	3.10629	0.321927	12055.1	623.2	269.7	58.1	19.3439	4.642	0.215425	13662.1	618.9	210.1	97.6	22.0748	2.15266	0.464541	41508.6	1373.5	414.9	147.3	30.221	2.8167	0.355025
								301252	3573.2	1257.5	323.8	84.3086	3.88357	0.257495	348884	7405.7	1602.6	531.2	47.1102	3.01694	0.331461	127167	3377	1250.9	159.9	37.6568	7.82301	0.127828	55941.3	1528.9	581.8	136.3	36.5892	4.26853	0.234273	335278	3408.9	1339.5	330.6	98.3536	4.05172	0.246809	67038.3	1603.1	420.8	217.6	41.8179	1.93382	0.51711
								841107	4993.9	1343.2	833.7	168.427	1.61113	0.620682	212328	3898.1	1455.2	217.3	54.4697	6.69673	0.149327	91143.5	1822	726.2	171.8	50.0239	4.22701	0.236574	14478.3	685.1	237.1	84.5	21.1331	2.80592	0.35639	7817.1	646.6	214	53.5	12.0895	4	0.25	47825.1	1212.7	437.7	154.8	39.4369	2.82752	0.353667
								316871	5332.6	1158.7	390.1	59.4214	2.97026	0.33667	32753.7	1253.5	560.9	80	26.1298	7.01125	0.142628	13525.3	623.9	225.3	81.2	21.6786	2.77463	0.360408	13018.3	831.4	260	84	15.6583	3.09524	0.323077	218260	3473.5	1239.4	242.4	62.8357	5.11304	0.195579	11908.1	543.9	171.8	97.6	21.8939	1.76025	0.568102
								2.09608e+06	12420.1	1956.1	1790	168.765	1.09279	0.915086	354957	7721.7	1133.4	685.1	45.9688	1.65436	0.604464	239217	5624.1	1674.5	374.3	42.5343	4.47368	0.223529	16272.9	809.1	281.3	96.7	20.1123	2.909	0.343761	161097	2851.3	1029.9	210	56.4994	4.90429	0.203903	32621.9	858.1	275.9	160.6	38.0164	1.71793	0.582095
								11969	624.8	261.1	59.2	19.1565	4.41047	0.226733	29514.3	1523.5	492.5	103	19.3727	4.78155	0.209137	32003.4	998.7	283.5	161	32.0451	1.76087	0.567901	236084	3449	1319.3	251.6	68.45	5.24364	0.190707	40530.2	1540.5	421.5	223	26.3098	1.89013	0.529063	689505	10499.1	2105	871	65.6728	2.41676	0.413777
								65400.9	3056.2	767.2	269.9	21.3994	2.84253	0.351799	27800.8	1497.8	647	92.6	18.5611	6.98704	0.143122	8030	576	217.5	54.7	13.941	3.97623	0.251494	79970.5	1999.5	843.3	128	39.9952	6.58828	0.151785	13672.3	595.8	156.1	119.2	22.9478	1.30956	0.763613	146826	2905.4	806.6	260.4	50.5357	3.09754	0.322837
								945299	14269.9	4359.8	454.7	66.2443	9.5883	0.104294	350664	8936.8	1825.1	508.5	39.2382	3.58918	0.278615	333524	3755.7	1414.5	311.3	88.8047	4.54385	0.220078	18128.3	918.4	363.4	72.2	19.739	5.03324	0.198679	90509.8	2194.1	745.8	170.9	41.2514	4.36396	0.22915	7913.4	457.6	170.2	65.9	17.2933	2.5827	0.387192
								37077.9	849.8	242.8	200.6	43.6313	1.21037	0.826194	118513	4487.4	1409.3	257.6	26.4103	5.47089	0.182786	110281	2153.1	557.2	337.7	51.2195	1.64999	0.606066	60985.4	1830.9	827.3	101.6	33.309	8.14272	0.122809	189546	3017.3	1236.7	205.1	62.8199	6.02974	0.165845	45696	1130.2	410.9	160.5	40.4318	2.56012	0.390606
								222523	4550.1	739.6	582.2	48.9051	1.27035	0.787182	10027.4	1021.2	325.6	85	9.81923	3.83059	0.261057	49675.5	1413.5	476.9	161	35.1436	2.96211	0.337597	57158	1554.9	534.4	157.5	36.7599	3.39302	0.294723	1.11855e+06	5664.1	1595.6	998.4	197.481	1.59816	0.625721	115173	3536.1	924.3	413.8	32.5705	2.23369	0.44769
								1.07747e+06	7630.9	2868.4	569	141.198	5.04112	0.198368	15786.2	729.1	294.5	77.1	21.6516	3.81971	0.2618	430173	6279.3	1401.7	668.4	68.5065	2.0971	0.47685	1.04944e+06	17188.1	3685.3	877.7	61.0559	4.19882	0.238162	71306.8	1430.9	587.4	162.5	49.8335	3.61477	0.276643	598270	9574	1862.7	979.6	62.4891	1.90149	0.525903
								8065.5	553.5	223.6	53	14.5718	4.21887	0.23703	121728	2862	1194.1	144.7	42.5323	8.25225	0.121179	22650.3	1044.3	377.7	90.6	21.6895	4.16887	0.239873	153447	4796.1	986.5	252.3	31.9941	3.91003	0.255753	218194	2843.1	677.2	449.7	76.7451	1.50589	0.664058	15700.1	813.2	294.2	101.4	19.3066	2.90138	0.344663
								260787	4496.8	1022	421.1	57.994	2.42698	0.412035	36358	1359.1	388.2	144	26.7515	2.69583	0.370943	187798	2703.1	836.2	318.4	69.4749	2.62626	0.38077	19218.3	1382.4	423.7	76.5	13.9021	5.53856	0.180552	161639	3670.9	1481.8	166.8	44.0326	8.88369	0.112566	271763	2431	773.7	460.3	111.79	1.68086	0.594933
								11142.6	474.1	182.2	79.7	23.5026	2.28607	0.437431	8922.2	409.2	150.5	77	21.804	1.95455	0.511628	149254	5025.3	2353.4	211.3	29.7006	11.1377	0.089785	423339	8104	2663.3	389.9	52.2383	6.83073	0.146397	32855.1	1141.6	361.8	145.7	28.7799	2.48318	0.402709	763696	7746.8	1574.6	756.4	98.5822	2.0817	0.480376
								1.63954e+06	21684.1	3161.8	2056	75.6102	1.53784	0.650263	11720.6	630.1	270.8	59.4	18.6012	4.55892	0.21935	18787.4	701	200.8	130.6	26.8009	1.53752	0.650398	28404.1	1412.5	512.9	78.6	20.1091	6.52545	0.153246	26234.4	1212.8	340.5	191	21.6313	1.78272	0.56094	8648.5	574.9	202.2	76.1	15.0435	2.65703	0.37636
								108010	2401.9	853.5	186.8	44.9684	4.56906	0.218864	182591	2892.8	1096.5	228.9	63.1192	4.7903	0.208755	138583	2444.3	927.4	270.1	56.6966	3.43354	0.291244	19522.4	1503.1	576.2	66.4	12.9881	8.67771	0.115238	2.32175e+06	21602.6	4566.2	2522.6	107.476	1.81012	0.552451	331907	5325.8	1781.3	458	62.3205	3.8893	0.257116
								402732	5211.4	1179.4	558.2	77.279	2.11286	0.473292	20536.3	1072.7	508.3	61.6	19.1445	8.25162	0.121188	52828.7	1010.1	315.2	228	52.3005	1.38246	0.72335	13870	661.1	248.2	74.2	20.9802	3.34501	0.298952	9175.7	636.4	210	71.1	14.4181	2.95359	0.338571	62693.8	1909.1	589.2	197.9	32.8395	2.97726	0.335879
								25585.5	765.7	275.4	123.1	33.4145	2.23721	0.446986	238705	4658	1106.1	630.3	51.2462	1.75488	0.56984	15725.4	683.8	268.1	83.6	22.9971	3.20694	0.311824	27598	1117.3	482.3	80.9	24.7006	5.96168	0.167738	13332.6	987.5	233.7	95.2	13.5014	2.45483	0.40736	18138.5	742.3	229.4	120.9	24.4355	1.89744	0.527027
								13849.7	618.9	258.4	70.5	22.3779	3.66525	0.272833	236763	2766.1	805.1	393.8	85.5946	2.04444	0.489132	60189.5	1690.4	464.8	183.3	35.6067	2.53573	0.394363	31268.3	1784.2	509.6	105.1	17.5251	4.84872	0.20624	9571.1	752.5	204.9	83.3	12.7191	2.45978	0.40654	627333	5751.1	1451.8	992.5	109.081	1.46277	0.683634
								51150.7	1231.5	317.1	228.8	41.5353	1.38593	0.721539	19497.1	1010.2	383	86.8	19.3002	4.41244	0.226632	428844	4332.4	1182.8	554.7	98.9854	2.13232	0.468972	30573.8	1082.1	300.9	139	28.2541	2.16475	0.461947	325240	7182	2409.6	262.9	45.2855	9.16546	0.109105	42527.6	1506.8	634.5	109.9	28.2238	5.77343	0.173207
								69745.4	1398.9	554	166.2	49.8573	3.33333	0.3	27912.4	1605.9	815.4	58.5	17.3812	13.9385	0.0717439	24541.2	757.4	241.7	143.8	32.4019	1.68081	0.594952	356656	7234.9	2093.3	351.2	49.2965	5.96042	0.167773	16409.8	726.1	237.2	108.8	22.5999	2.18015	0.458685	792582	9587	2223.2	603.6	82.6726	3.68323	0.271501
								536697	7364	2138.2	744.6	72.8812	2.87161	0.348237	43161.2	2222	1042	100.9	19.4245	10.3271	0.096833	123760	2675.2	509.4	420.2	46.2621	1.21228	0.824892	34735.8	1509.9	578.8	91.6	23.0054	6.31878	0.158258	241245	5184.8	1375.9	639.5	46.5292	2.15152	0.464787	456138	5056.9	1077.8	642.5	90.2012	1.67751	0.596122
								21317	783.1	261.4	128.1	27.2213	2.04059	0.490054	215735	2673.7	890.4	320.6	80.6879	2.77729	0.360063	1.20227e+06	14021.9	4189.7	1036.1	85.7426	4.04372	0.247297	177709	4076.7	813.8	358.2	43.5915	2.27192	0.440157	12318.7	526.9	181.1	88.4	23.3796	2.04864	0.488128	570079	4371.3	1381.2	553.4	130.414	2.49584	0.400666
								252342	6446.7	1527.7	525.2	39.1428	2.9088	0.343785	84193.3	2157.1	685.7	170.4	39.0308	4.02406	0.248505	17296.9	704.4	250.1	93.6	24.5555	2.67201	0.37425	14042.4	777.7	316.8	81.1	18.0563	3.90629	0.255997	13900.4	775.3	190.1	124.2	17.9291	1.5306	0.65334	20465.3	726.5	244.7	114.7	28.1697	2.13339	0.468737
								120658	1729.2	479.9	352.7	69.7767	1.36065	0.734945	8308.8	481.9	168.9	74.6	17.2418	2.26408	0.441681	160828	2928.1	757.9	405.6	54.9258	1.86859	0.535163	14407.4	800.8	367	54.5	17.9913	6.73394	0.148501	15314.8	615.9	227.1	92.7	24.8657	2.44984	0.40819	444352	4960.1	1288.1	514.4	89.5853	2.50408	0.399348
								69557.8	1429.1	353	268.2	48.6725	1.31618	0.759773	14858.5	572.1	209.3	93.5	25.9719	2.2385	0.446727	7796.8	470.3	177.9	58.9	16.5784	3.02037	0.331085	50831.3	1365.5	417.5	167.5	37.2254	2.49254	0.401198	31760.1	820.8	280	155.5	38.6941	1.80064	0.555357	55333	1392.7	557.2	144.7	39.7307	3.85073	0.259691
								145037	2248.3	859.8	227.5	64.5095	3.77934	0.264596	25889.6	919.9	345.6	107.3	28.1439	3.22088	0.310475	349492	3178.5	905.4	532	109.955	1.70188	0.587586	29002.3	1170.5	439	93.6	24.7777	4.69017	0.213212	71813.7	1662	624.3	211.2	43.2092	2.95597	0.338299	8075.6	503.9	178.9	64.6	16.0262	2.76935	0.361096
								7756.2	424.4	164.7	62.5	18.2757	2.6352	0.379478	61380.8	2302.5	717.7	236.6	26.6583	3.03339	0.329664	359489	4382.4	1629.5	365	82.0303	4.46438	0.223995	34690.2	1029.7	315.3	163.3	33.6896	1.9308	0.517919	157746	2838.8	753.4	312.6	55.5678	2.41011	0.414919	273866	3598.9	1364.5	347.7	76.0973	3.92436	0.254819
								22112.9	632.3	201.9	143.1	34.9722	1.4109	0.708767	718391	8662.4	3484.1	498.3	82.9321	6.99197	0.143021	44225.8	1234.1	466.6	129.6	35.8365	3.60031	0.277754	140211	3673.7	1314.9	265.1	38.166	4.96002	0.201612	19208.1	652.8	229.6	110.2	29.4242	2.08348	0.479965	1.46488e+06	16820.5	2735.3	1357.6	87.0887	2.01481	0.496326
								275367	3843.9	1153.9	369.5	71.6374	3.12287	0.320218	516500	8461.1	1517.3	989.9	61.0441	1.53278	0.652409	96948	2083.3	693.2	195.9	46.5358	3.53854	0.282602	910487	10784.3	2102.3	687.5	84.4271	3.05789	0.327023	597784	6640.2	1467.8	775.4	90.0249	1.89296	0.528274	56569.9	1335.1	522.2	146.5	42.3713	3.56451	0.280544
								208379	2477.9	671.1	442.3	84.0952	1.5173	0.659067	9834.7	730	294.2	49.6	13.4722	5.93145	0.168593	37954.9	1415	498.8	148.6	26.8233	3.35666	0.297915	69375.3	2469.1	1141.9	98.9	28.0974	11.546	0.08661	48088.7	1132.1	404.9	155.3	42.4774	2.60721	0.383551	10301.1	664.9	239.2	89.8	15.4927	2.6637	0.375418
								291321	2870.2	771.3	504.8	101.498	1.52793	0.654479	38046.2	1076	362.1	141.3	35.3589	2.56263	0.390224	146552	3274.8	749.9	325.1	44.7516	2.30667	0.433524	462384	3717.7	1112.8	561	124.374	1.9836	0.504134	13297.1	858.3	330.1	69.6	15.4924	4.74282	0.210845	41148.7	1131.7	342.7	166.6	36.3601	2.05702	0.486139
								646090	7175.8	1497.9	742	90.0374	2.01873	0.49536	132444	3346.2	801.3	468.9	39.5805	1.70889	0.585174	82469.7	1999.2	775.2	156.4	41.2514	4.95652	0.201754	226710	4413	1941.6	270.4	51.3733	7.18047	0.139267	11487.4	557.3	167	113.3	20.6126	1.47396	0.678443	45731.4	1342.8	434.9	153.1	34.0567	2.84063	0.352035
								86910.5	1644.2	397.6	309.1	52.8588	1.28632	0.777414	46821.4	1031.3	368	166.2	45.4004	2.2142	0.45163	35283.3	1067.6	363.8	141.2	33.0492	2.57649	0.388125	269167	2952	1154.6	313.2	91.1813	3.68646	0.271263	301003	3222.5	868.2	509.9	93.4067	1.70269	0.587307	28125.3	827.7	244.2	158.1	33.9801	1.54459	0.64742
								238421	2870.7	983.5	367.8	83.0533	2.67401	0.373971	46491.9	1418.2	413.2	186.9	32.7823	2.21081	0.452323	11304.9	807.3	320.9	49.9	14.0033	6.43086	0.1555	392968	11115.3	2754.9	239.6	35.3538	11.4979	0.0869723	42147.3	1269.4	466.2	124.6	33.2025	3.74157	0.267267	18331.1	649.1	231.8	104	28.2408	2.22885	0.448663
															16734.2	676.8	270.9	84.1	24.7255	3.22117	0.310447	98245.8	2068.2	640.6	221.4	47.503	2.89341	0.345613	371428	9501.1	2364.5	449.2	39.0931	5.2638	0.189977	45645.3	1536.4	528.6	119.5	29.7093	4.42343	0.226069	16724.1	994.9	471.8	63.4	16.8098	7.44164	0.134379
												60.4102	3.35478	0.405417	9479.9	422	151.6	82.2	22.4642	1.84428	0.542216	138360	2786.5	653.6	316.6	49.6538	2.06443	0.484394	84507.6	1691.6	637.3	185.2	49.9572	3.44114	0.290601	232074	3896.9	1239.9	327.2	59.5535	3.78943	0.263892	12759.8	523.2	162.3	103.9	24.388	1.56208	0.640173
												36.6309	2.07876	0.205685	123725	3145.4	677.5	362.8	39.3352	1.86742	0.535498	133504	2172.1	514.2	363	61.463	1.41653	0.705951	89901.5	1895.8	785.6	154	47.4214	5.1013	0.196029	461076	5519.1	1381.4	676.7	83.5419	2.04138	0.489865	23294.1	1017.6	411	86	22.8912	4.77907	0.209246
															11517.8	703.2	276.2	69.3	16.3791	3.98557	0.250905	123497	3361.3	1007.5	268.7	36.7408	3.74953	0.2667	15066.4	687.4	262.5	80.8	21.918	3.24876	0.30781	85415	1393.2	473.7	240.6	61.3085	1.96883	0.507916	288811	3656.3	1279.7	375	78.99	3.41253	0.293037
															14878.8	1309	388.8	127.2	11.3665	3.0566	0.32716	166830	3225.8	749.6	409.1	51.7175	1.83231	0.545758	38416.2	1952	762.9	115.9	19.6804	6.5824	0.15192	118270	3369	825.7	451.7	35.1054	1.82798	0.547051	22888.5	901.1	185.3	175.2	25.4006	1.05765	0.945494
															32256.9	2273.4	437.4	350.9	14.1888	1.24651	0.802241	23780.8	952.5	270.5	137.9	24.9667	1.96157	0.509797	262080	3606.2	866.8	481.2	72.6749	1.80133	0.555145	8678.9	430.7	168.7	67.7	20.1507	2.49188	0.401304	165213	2161.3	662.9	330.1	76.4415	2.00818	0.497963
															37589.9	1253.2	416.6	122.4	29.9951	3.40359	0.293807	175504	4503.3	1605.5	341.8	38.9723	4.69719	0.212893	38228.7	1627.4	701.2	81.1	23.4907	8.64612	0.115659	11583.7	753.3	344.7	46.6	15.3773	7.397	0.13519	7923.5	596.1	257.5	53.7	13.2922	4.79516	0.208544
															110418	3077	939.4	319.6	35.8848	2.9393	0.340217	109698	3049.2	847.2	360.5	35.9759	2.35007	0.425519	220668	3328	909.1	375.1	66.3064	2.42362	0.412606	244403	3407.1	1184.7	289.4	71.7334	4.09364	0.244281	589678	6142.5	1167	1059.3	95.9996	1.10167	0.907712
															90008	3091.3	1501.9	133.3	29.1166	11.2671	0.0887542	128120	3045.7	677.3	285.9	42.0659	2.36901	0.422117	199721	3527.9	1133.2	302.5	56.6118	3.74612	0.266943	137737	3342.7	537	484.1	41.2053	1.10927	0.90149	12166.7	849.4	411.8	53.4	14.3239	7.71161	0.129675
															627202	6305.2	992.7	897.9	99.4737	1.10558	0.904503	14022.1	805.3	331.5	60.7	17.4123	5.46129	0.183107	76878.1	1364.1	501.6	208.6	56.3581	2.4046	0.415869	8491.3	595.7	169.9	112.7	14.2543	1.50754	0.663331	298484	6089.5	1350.8	432.1	49.0161	3.12613	0.319885
															45391.8	1536.7	625	101.8	29.5385	6.13949	0.16288	432327	4041.9	856.2	773.3	106.961	1.1072	0.903177	9606.6	492.8	165.6	89.4	19.4939	1.85235	0.539855	14260.3	662	271.7	76.2	21.5412	3.56562	0.280456	71463.9	1191.5	350.9	279.8	59.9781	1.25411	0.797378
															80087.1	2797.1	597.9	305.7	28.6322	1.95584	0.51129	31719.5	1305.6	433.1	119	24.295	3.6395	0.274763	19350.1	822.8	348.2	74.5	23.5174	4.67383	0.213957	569937	11632.6	2759.5	826.7	48.9948	3.33797	0.299583	568720	6410.6	1201.3	692	88.7156	1.73598	0.576043
															10144	611.9	176.2	104.4	16.5779	1.68774	0.592509	43217	1328.7	460.7	134.3	32.5258	3.43038	0.291513	153371	3697.3	1160.7	258.6	41.4819	4.4884	0.222797	86327.5	1655.5	427.6	284.7	52.1459	1.50193	0.665809	30933.7	906.5	330.6	128.4	34.1243	2.57477	0.388385
															22624.9	929.6	399.6	74.7	24.3383	5.3494	0.186937	35090.7	913.9	279.9	180.4	38.3967	1.55155	0.644516	230026	6143.8	1764.5	381.2	37.4403	4.6288	0.216039	12658.4	691.7	239.8	71.1	18.3004	3.37271	0.296497	20749.2	958.2	225.8	128.6	21.6544	1.75583	0.569531
															32784.1	1394.3	404.9	190.8	23.5129	2.12212	0.471227	58876.5	1724.3	495.1	165.2	34.1452	2.99697	0.33367	9368.3	501.4	158.5	82	18.6843	1.93293	0.51735	12217.4	794.3	351.2	46	15.3813	7.63478	0.130979	344788	5275.7	1161.5	615.6	65.354	1.88678	0.530004
															147130	3667.9	603.7	573.3	40.113	1.05303	0.949644	88030.9	3270.8	1020	273.7	26.9142	3.72671	0.268333	667788	6325.4	2051.5	431.7	105.572	4.75214	0.210431	15781.2	604.5	227.4	91.8	26.1062	2.47712	0.403694	230452	3295.8	841.4	380	69.9229	2.21421	0.451628
															23699.6	1028.6	277	167.1	23.0406	1.65769	0.603249	32844.9	1026.2	393.9	119.1	32.0063	3.3073	0.302361	158212	2507.6	959.9	217.1	63.0931	4.42146	0.226169								427729	4959.8	1549.4	401.9	86.2392	3.85519	0.259391
															46669.3	1291.3	358.5	174.9	36.1413	2.04974	0.487866	22356.2	1055.3	400.2	81.2	21.1847	4.92857	0.202899	60351.7	1429.5	596.6	134.4	42.2187	4.43899	0.225277					48.9419	3.393	0.375722	61821.9	1350.8	350.7	237.1	45.7669	1.47912	0.676076
															12572.2	794.9	244.3	76.3	15.8161	3.20183	0.312321	125955	3446.8	821	409.2	36.5427	2.00635	0.498417	10179.4	507.9	206.8	64.8	20.0421	3.19136	0.313346					30.2303	1.82312	0.179592	347890	3982.9	1174.5	493.7	87.346	2.37898	0.420349
															18391.9	1086.9	457.2	81.4	16.9214	5.61671	0.17804	25859.2	887.4	300.4	117.4	29.1404	2.55877	0.390812	58658.5	1360.2	472.2	180.5	43.1249	2.61607	0.382253								115239	1865	649.4	248.3	61.7901	2.61538	0.382353
															25783.2	893.6	317.9	113.9	28.8532	2.79104	0.358289	122422	3125.7	554.3	420.1	39.1663	1.31945	0.757893	316125	6939.7	1584.6	517	45.5532	3.06499	0.326265								27344.6	730.9	229.3	158.9	37.4122	1.44305	0.692979
															34715.5	950.3	357.8	131.1	36.5311	2.72921	0.366406	80746.1	2366.8	977.6	117.2	34.1161	8.3413	0.119885	221215	4584.9	1084.8	422.6	48.2487	2.56697	0.389565								448433	6616.2	1567.1	454.6	67.778	3.44721	0.29009
															31019.9	1279.5	348	150.6	24.2438	2.31076	0.432759	23334.6	812.3	311.1	111.8	28.7266	2.78265	0.35937	58932.3	2320.3	829.1	139.1	25.3986	5.96046	0.167772								920925	6512.5	2008.3	787.5	141.409	2.55022	0.392123
															169821	4015.6	1167.3	259.9	42.2904	4.49134	0.222651	61624.1	1502.3	661.4	128.9	41.0198	5.13111	0.19489	372928	4873	1837.5	280.3	76.5296	6.55548	0.152544								17864.7	800.1	285.5	91	22.3281	3.13736	0.318739
															11969	571.8	239	67.9	20.9321	3.51988	0.2841	21195.3	761.1	263	116.9	27.8482	2.24979	0.444487	309738	3975.7	1311.4	349.2	77.9078	3.75544	0.26628								18300.7	725.2	173.2	143.6	25.2354	1.20613	0.829099
															114706	3207.5	1157.1	155.9	35.7619	7.42207	0.134733	74966.9	1563.4	460.3	231.3	47.9512	1.99006	0.502498	90002.9	2172.1	613.7	198.9	41.4359	3.08547	0.3241								848026	6056.5	1615	768.9	140.019	2.1004	0.476099
															40236.2	1334.4	410.5	194.5	30.153	2.11054	0.473812	46618.6	1754.6	340	243.8	26.5694	1.39459	0.717059	29164.5	913.8	300.2	139.4	31.9156	2.15352	0.464357								16171.5	865.6	216.7	105	18.6824	2.06381	0.484541
															25124.2	1473.8	500.3	105	17.0472	4.76476	0.209874	128683	1905.9	578.5	305	67.5181	1.89672	0.527226	20465.3	623.9	177	159.9	32.8022	1.10694	0.90339								48565.3	1289.5	363	195	37.6621	1.86154	0.53719
															24982.2	677.6	248.7	132.5	36.8687	1.87698	0.53277	229332	2233.1	624.2	492.3	102.696	1.26793	0.78869	98053.2	2141.8	815.1	161.9	45.7807	5.03459	0.198626								329225	4431.8	914.5	641	74.2869	1.42668	0.700929
															9069.2	741.5	226.2	70.1	12.2309	3.22682	0.309903	19481.9	598.5	216	117.4	32.5512	1.83986	0.543519	27298.9	1302.5	583.1	63.6	20.9588	9.16824	0.109072								74596.9	1551.9	450.8	233.5	48.0681	1.93062	0.517968
															152747	4039.7	1146.9	359.5	37.8116	3.19026	0.313454	17550.4	1013.5	384.2	69	17.3166	5.56812	0.179594	33635.8	1150.1	460.1	102.8	29.246	4.47568	0.22343								209540	4267.9	1204.4	280.3	49.0968	4.29682	0.23273
															9474.8	623.4	280	45.2	15.1986	6.19469	0.161429	27187.4	972.2	280.3	160.3	27.9648	1.7486	0.571887	72493	1482.8	569.3	171	48.8893	3.32924	0.300369								702133	8153.1	2009.4	1192	86.1185	1.68574	0.593212
															82697.8	2984.5	518.3	281	27.7091	1.84448	0.542157								189511	4893.1	1540.4	441.4	38.7303	3.48981	0.286549								15198.2	672.7	248.6	83.6	22.5928	2.97368	0.336283
															30731	1355.1	370.5	130.4	22.678	2.84126	0.351957					49.1175	3.50182	0.389565	87965	2174.1	936.9	128.3	40.4604	7.30242	0.136941								101328	2356.9	459.7	365.7	42.9921	1.25704	0.795519
															22706	1507.5	393.6	196.3	15.062	2.00509	0.49873					32.8135	1.62744	0.211183	75458.7	2213	996.1	105.2	34.0979	9.46863	0.105612								385962	3851	1118.7	520.2	100.224	2.15052	0.465004
															39232.4	1569.2	567.1	96.8	25.0015	5.85847	0.170693								91204.3	3673.6	975.3	413.8	24.827	2.35694	0.42428								403426	4152.9	1237.7	454.9	97.1433	2.72082	0.367537
															160230	4737.3	1025.1	451.7	33.823	2.26943	0.44064								136414	3799.1	1504	138.1	35.9068	10.8907	0.0918218								16521.3	939	410.2	55.8	17.5946	7.35125	0.136031
															34893	1323.8	566.6	86.5	26.3582	6.55029	0.152665								21408.3	849.5	197.2	151.2	25.2011	1.30423	0.766734								13854.8	739.5	191.8	114.9	18.7354	1.66928	0.599062
															9170.6	516.6	182	82.2	17.7518	2.21411	0.451648								213880	5163.2	1477.7	232.5	41.4239	6.3557	0.157339								484101	5676.2	1874.6	366.1	85.2862	5.12046	0.195295
															40043.5	1445.9	357.5	208.4	27.6945	1.71545	0.582937								204217	2636.1	1005.5	279.2	77.4695	3.60136	0.277673								126934	1885.9	673.4	252.8	67.3068	2.66377	0.375408
															345361	7293	1706.1	620.4	47.3551	2.75	0.363636								185491	3842	1613.2	164.4	48.2798	9.81265	0.101909								15395.9	581	163.2	129.1	26.499	1.26414	0.791054
															26112.7	919.9	308.3	112.8	28.3865	2.73316	0.365877								12673.6	677.7	243.3	88.1	18.7009	2.76163	0.362104								39992.8	941.9	306.5	172.2	42.4597	1.77991	0.561827
															96618.5	4388.9	1428.4	319	22.0143	4.47774	0.223327								399097	6657.2	2436.5	361.1	59.9497	6.74744	0.148204								17910.3	586.6	203.2	118.7	30.5324	1.71188	0.584154
															20683.3	1009.3	438.5	75.2	20.4927	5.83112	0.171494								7812	492.1	185.3	57.3	15.8748	3.23386	0.309228								9459.6	525.3	208.6	68.3	18.008	3.05417	0.327421
															24657.8	930.9	406.9	80.8	26.4881	5.03589	0.198575								20881	678.8	232.5	123	30.7616	1.89024	0.529032								30852.6	1095.3	338.6	151.7	28.1682	2.23204	0.448021
															11527.9	775.4	324.8	51.9	14.867	6.25819	0.159791								9059.1	521	178.4	80.3	17.3879	2.22167	0.450112								311938	4762.2	1590.4	315.4	65.5029	5.04249	0.198315
															22741.5	1125.5	322	105.1	20.2057	3.06375	0.326398								164848	2347.6	699.5	317.1	70.2198	2.20593	0.453324								458115	6344.7	1627.6	613.5	72.2044	2.65297	0.376935
																																											315431	4072.8	804.3	607	77.4482	1.32504	0.754694
																			37.1242	4.21882	0.322586												41.4598	4.46893	0.296796								354608	4230	1087.3	545.9	83.8316	1.99176	0.502069
																			23.9194	2.52649	0.1765												26.9071	2.64099	0.157222								242664	3790.6	1510.2	319.3	64.0173	4.72972	0.211429
																																											119892	2068.5	627.9	274.7	57.961	2.28577	0.43749
																																											86322.5	1611.8	467.3	253.5	53.5566	1.84339	0.542478
																																											231435	2900.7	860.3	391.9	79.786	2.1952	0.455539
																																											10868.9	526	191.6	75.3	20.6633	2.54449	0.393006
																																											13337.7	622.9	167.9	113.6	21.4123	1.47799	0.676593
																																											72994.9	2517.9	444.7	330	28.9904	1.34758	0.742073
																																											8303.7	428.4	161.7	67.2	19.3831	2.40625	0.415584
																																											427836	6757	1688	575.2	63.3174	2.93463	0.340758
																																											106935	2619.8	698.1	266.4	40.8179	2.6205	0.381607
																																											127988	1998.4	757.6	228.5	64.0453	3.31554	0.30161
																																											112623	1979.4	547.2	288	56.8974	1.9	0.526316
																																											28617	909.9	236.1	170.9	31.4507	1.38151	0.723846
																																											144555	2151.5	705.6	301	67.1881	2.34419	0.426587
																																											178059	2695.8	759.8	342.3	66.0506	2.21969	0.450513
																																											412850	6913.1	1929.3	627.4	59.72	3.07507	0.325196
																																											215147	3625.8	1231.1	263.4	59.3379	4.67388	0.213955
																																											305708	4199	1111.8	428.5	72.8049	2.59463	0.385411
																																											361451	4659.4	1001.2	576.4	77.5746	1.73699	0.575709
																																											9038.8	646.4	253.8	52.8	13.9833	4.80682	0.208038
																																											71610.9	2176.1	731.7	170.7	32.9079	4.28647	0.233292
																																											34127.5	1058.6	406.9	115.4	32.2383	3.526	0.283608
																																											368341	4156.7	1544.5	362.1	88.6137	4.2654	0.234445
																																											1.0806e+06	15005.4	2945.8	877.6	72.0139	3.35665	0.297916
																																											587772	5687.4	1773.8	488.9	103.346	3.62814	0.275623
																																											434710	6269.6	1322.7	492.4	69.3361	2.68623	0.372269
																																											17423.7	613.7	180.1	129.2	28.3912	1.39396	0.717379
																																											20308.2	852.2	201.1	169.5	23.8303	1.18643	0.842864
																																											32114.9	1719.1	664.7	114	18.6812	5.8307	0.171506
																																											183909	2850.4	768.5	383.7	64.5205	2.00287	0.499284
																																											335663	6070.6	2256.8	266.4	55.2932	8.47147	0.118043
																																											16992.8	583.1	174.5	131.4	29.1422	1.32801	0.753009
																																											7888.1	495.5	175.8	68.8	15.9195	2.55523	0.391354
																																											24718.6	1034.5	232.3	187.8	23.8942	1.23695	0.808437
																																											638451	7391.9	1714	706	86.3717	2.42776	0.411902
																																											412323	3892.4	1033.6	555.4	105.93	1.861	0.537345
																																											725346	8025.3	1829.1	1053.4	90.3824	1.73638	0.575912
																																											474951	3890	1039.5	633.2	122.095	1.64166	0.609139
																																											54638.5	1221.9	345.8	214.5	44.716	1.61212	0.620301
																																											525199	6004.4	1282.2	678.5	87.4691	1.88976	0.529169
																																											65755.7	1555.5	447.4	214.3	42.273	2.08773	0.47899
																																											309971	3550.8	1267	325	87.2961	3.89846	0.256511
																																											142320	3000.4	939.6	225.9	47.4335	4.15936	0.240421
																																											900414	8831.3	2630.2	626.8	101.957	4.19623	0.238309
																																											11771.2	561.3	161.1	105.4	20.9713	1.52846	0.654252
																																											122559	2632.3	571.3	302.7	46.5596	1.88735	0.529844
																																											21109.2	870.7	324	96	24.2439	3.375	0.296296
																																											42801.3	1866.8	501.1	201.6	22.9276	2.48562	0.402315
																																											22837.8	1119.7	359.8	112	20.3964	3.2125	0.311284
[truncated: 119 more columns]

## Sheet: 400 degrees C
Area	Perimetre	Length	Width	A/P	L/W	W/L	Area	Perimetre	Length	Width	A/P	L/W	W/L	Area	Perimetre	Length	Width	A/P	L/W	W/L
Forbs							Forbs							Shrubs
Xeranthemum annum	Xeranthemum annum	Xeranthemum annum	Xeranthemum annum	Xeranthemum annum	Xeranthemum annum	Xeranthemum annum	Thymus	Thymus	Thymus	Thymus	Thymus	Thymus	Thymus	Ephedra distachya	Ephedra distachya	Ephedra distachya	Ephedra distachya	Ephedra distachya	Ephedra distachya	Ephedra distachya
588319	4693	1170.6	720.1	125.361	1.62561	0.615155	28206.4	1128.7	396	117.5	24.9902	3.37021	0.296717	21063.5	725.6	260.5	114.2	29.0291	2.28109	0.438388
308729	5483.2	1059.6	437.5	56.3045	2.42194	0.412892	17950.9	812.5	328.5	76.7	22.0934	4.28292	0.233486	19770.8	726.7	197.2	134.5	27.2063	1.46617	0.682049
51916.2	1732.1	614.7	142.6	29.973	4.31066	0.231983	431942	7728.9	2266.5	633.7	55.8866	3.57661	0.279594	28561.2	874.8	333.3	115	32.6488	2.89826	0.345035
265695	3764	1245.9	305.9	70.5884	4.0729	0.245525	19877.3	1188.1	531.2	50.9	16.7303	10.4361	0.0958208	41392	1267.3	444.9	130	32.6616	3.42231	0.2922
21732.7	1475.3	652.6	53.1	14.731	12.29	0.0813668	22564.1	1017.6	254.4	145.7	22.1738	1.74605	0.57272	90798.8	1770.7	652	198	51.2785	3.29293	0.303681
3.46235e+06	16920.3	4158	1349.1	204.627	3.08205	0.324459	18518.7	1013.1	342.5	96.6	18.2792	3.54555	0.282044	109982	1918.4	509	335.8	57.3299	1.51578	0.659725
20075	1107.6	426.3	71.4	18.1248	5.97059	0.167488	14534.1	981.3	425	57.4	14.8111	7.40418	0.135059	104841	1693.5	618.6	229.4	61.9079	2.6966	0.370837
133889	4219.8	750	371	31.7288	2.02156	0.494667	9145.3	554.5	184.1	73.7	16.4929	2.49796	0.400326	13434	724	230.8	103.6	18.5552	2.2278	0.448873
11837.1	1031.1	250.1	148	11.4801	1.68986	0.591763	41539	1332.9	502.7	116	31.1644	4.33362	0.230754	21616.1	660.3	222.9	127.7	32.7368	1.7455	0.572903
23679.4	1199.9	210.7	183	19.7345	1.15137	0.868533	10367	960.1	184.2	127.8	10.7978	1.44131	0.693811	131968	2099.9	556.6	338.4	62.8448	1.6448	0.607977
15938.3	953.2	408.4	72.7	16.7208	5.61761	0.178012	21692.1	871.7	279.1	133	24.8848	2.0985	0.476532	27192.5	753.9	222.7	163.1	36.0691	1.36542	0.732375
7872.8	572.4	198.2	66.1	13.754	2.99849	0.333502	44154.8	1564.9	391.1	189	28.2157	2.06931	0.483252	14306	911.7	179	156.9	15.6916	1.14085	0.876536
14807.8	1198.6	299.9	115.8	12.3542	2.58981	0.386129	11239	535.6	187.9	84.3	20.9839	2.22894	0.448643	7746.1	456.3	166.6	64.4	16.9759	2.58696	0.386555
8278.4	449.7	152.1	73.1	18.4087	2.08071	0.480605	146948	5779.5	746.5	517.7	25.4257	1.44195	0.693503	576614	3427.2	945.9	835.7	168.246	1.13187	0.883497
13702.7	906.5	234	102.4	15.1161	2.28516	0.437607	669024	11858.1	2975.5	965.8	56.4192	3.08087	0.324584	16125.9	632.9	218.6	104.9	25.4794	2.08389	0.479872
622127	4749.5	1537.3	554.6	130.988	2.77191	0.360762	26188.7	863.8	285.9	133.8	30.318	2.13677	0.467996	30715.8	833.2	215.3	188.6	36.8649	1.14157	0.875987
13794	509.1	167.2	108.1	27.0949	1.54672	0.646531	54506.6	1405.2	350	261.2	38.7892	1.33997	0.746286	71981	1806.2	652.6	156.9	39.8522	4.15934	0.240423
15568.3	818	327.6	65.9	19.0322	4.97117	0.20116	24941.7	1155.3	358.3	176.3	21.5889	2.03233	0.492046	160823	3433.6	1288.2	254.1	46.838	5.06966	0.197252
199062	3036.9	1106.1	241.6	65.5477	4.57823	0.218425	182779	2994.5	641.9	465.6	61.0382	1.37865	0.725347	152859	3077.5	845.5	313.5	49.6698	2.69697	0.370787
80021.2	2030.2	895.6	117.2	39.4154	7.64164	0.130862	280660	4983	1081.2	509.3	56.3234	2.12291	0.471051	50547.4	1382	554.6	120	36.5755	4.62167	0.216372
67890	1671.1	730.3	124	40.6259	5.88952	0.169793	31993.3	1130.7	324.2	159.5	28.2951	2.0326	0.49198	166886	4560	1911.6	363.6	36.5978	5.25743	0.190207
33630.7	1407.4	609	78.1	23.8956	7.7977	0.128243	58268.2	1849.1	535.9	168.8	31.5117	3.17476	0.314984	115588	2316.5	919	215.9	49.8979	4.2566	0.234929
8760	431.4	166	69.6	20.306	2.38506	0.419277	43399.5	2844.1	469	400.8	15.2595	1.17016	0.854584	48043.1	1860.2	825.8	80.4	25.8268	10.2711	0.0973601
55692.9	2042.5	680.5	121.3	27.267	5.61006	0.178251	442917	5845.1	1369.9	487.6	75.7758	2.80947	0.355938	723227	6269.2	1918	591.9	115.362	3.24041	0.308603
61614	1596.5	550.6	158.5	38.5932	3.47382	0.287868	11659.7	780.6	233.2	80.1	14.9368	2.91136	0.343482	18260.1	919.5	361.2	68.9	19.8587	5.24238	0.190753
14295.8	796.5	301.7	89.3	17.9483	3.3785	0.295989	201652	4862.2	1073	341.1	41.4735	3.14571	0.317894	36854.8	1255.7	385.6	150.3	29.35	2.56554	0.389782
243769	4299	1342.6	297.1	56.7037	4.51902	0.221287	29078.3	1228.1	444.7	110.8	23.6775	4.01354	0.249157	353599	3059.6	873.2	548.9	115.57	1.59082	0.628607
205632	8530.9	1717	969.4	24.1044	1.7712	0.564589	54952.8	1569.6	435.5	194.3	35.0107	2.24138	0.446154	593799	4542	1263.8	668.2	130.735	1.89135	0.528723
86505	2054.2	946.7	122	42.1113	7.75984	0.128869	20850.6	758.8	235.5	122.6	27.4784	1.92088	0.520594	22173.7	789.9	296.1	98.6	28.0715	3.00304	0.332996
466156	4003	982.5	644.7	116.452	1.52396	0.656183	13200.8	591.4	199.8	92.5	22.3213	2.16	0.462963	12217.4	952.6	425.6	59.2	12.8253	7.18919	0.139098
207041	3570.8	809.6	514.1	57.9817	1.57479	0.635005	320586	7845	2051.5	381.2	40.8651	5.38169	0.185815	178389	2721.3	662	411.8	65.5527	1.60758	0.622054
178130	4341.7	1453.3	353.3	41.0277	4.1135	0.243102	218691	4445.3	1419.6	493.1	49.1959	2.87893	0.347351	7822.2	455.4	172.5	62.3	17.1765	2.76886	0.361159
38101.9	1513	448.1	153.6	25.183	2.91732	0.342781	12663.5	494.6	158	105.3	25.6035	1.50047	0.666456	602285	4562.2	1303.3	643.2	132.016	2.02627	0.493516
22259.9	692	188.8	154.3	32.1675	1.22359	0.817267	73299.1	1428.1	376.3	265.6	51.3263	1.41679	0.70582	175453	4361	1913.6	351.9	40.2324	5.43791	0.183894
16065.1	638.7	234	95.6	25.1528	2.4477	0.408547	15512.5	692.1	189.5	114.5	22.4137	1.65502	0.604222	11928.4	686.8	300.3	56.8	17.3681	5.28697	0.189144
14194.4	650.6	275.6	66.7	21.8174	4.13193	0.242017	110564	2549.7	539.7	360.4	43.3637	1.4975	0.667778	39425.1	1327.9	453.3	129.7	29.6898	3.49499	0.286124
53969.3	2069.8	369	209.6	26.0746	1.7605	0.568022	486200	7352.5	1054.4	793.3	66.1272	1.32913	0.752371	59824.5	2254.8	939.6	105.4	26.5321	8.91461	0.112175
72908.7	1443.7	365.2	285.6	50.5013	1.27871	0.782037	10275.8	499.9	199.2	69	20.5557	2.88696	0.346386	600151	12436.9	3362.2	1133.4	48.2557	2.96647	0.337101
8516.7	689.3	227.3	64	12.3556	3.55156	0.281566	7720.8	445.5	151.1	70.7	17.3306	2.1372	0.467902	94854.3	2249.6	474.9	298.4	42.165	1.59149	0.628343
19096.6	621.2	174.8	145.1	30.7415	1.20469	0.830092	40677.2	1738.9	678.1	111.9	23.3925	6.05987	0.16502	7786.7	619.4	259	46.4	12.5714	5.5819	0.179151
13778.7	987	254.5	132.5	13.9602	1.92075	0.520629	143501	2062.2	540.9	359.7	69.5862	1.50375	0.665003	58379.7	1446	593.5	130.3	40.3732	4.55487	0.219545
13930.8	531.1	155.3	125.2	26.2301	1.24042	0.806182	181319	3275.5	1172.8	250.7	55.3561	4.6781	0.213762	18939.4	630.7	194.9	131.5	30.0292	1.48213	0.674705
160276	3669.3	1031.4	424.1	43.6801	2.43197	0.411189	26173.5	786.1	230.9	148.9	33.2954	1.55071	0.644868
390109	4654.9	1131.3	478.5	83.8061	2.36426	0.422965	363190	6059.9	1544.6	547.6	59.9333	2.82067	0.354525					46.2981	3.31932	0.412126
436337	3333.6	944	654	130.891	1.44343	0.692797	61492.3	1800.3	480.1	196.8	34.1567	2.43953	0.409915					35.3806	2.07124	0.218874
159059	2194.5	718.6	297.4	72.4807	2.41627	0.41386	83159.1	1530.1	366.7	316.3	54.3488	1.15934	0.862558
17256.4	1027	481	50.7	16.8027	9.48718	0.105405	65228.5	2594.7	765.6	227.7	25.1391	3.36232	0.297414					36.3223	2.73292	0.365973
211446	3741.7	1196.2	345.7	56.5108	3.46023	0.288998	25823.7	718.6	227.9	153.5	35.9361	1.48469	0.673541					35.3806	2.07124	0.218874
21595.8	723	277.3	102.5	29.8697	2.70537	0.369636	15066.4	602.1	211.1	106.7	25.0231	1.97844	0.505448
92563	2946.6	1235.2	111	31.4135	11.1279	0.089864	46780.8	1602	514.1	186	29.2015	2.76398	0.361797
49041.8	1921.1	650.5	113.1	25.528	5.75155	0.173866	20718.8	1010	286.7	129.8	20.5137	2.20878	0.452738
98570.2	3012	1183.7	120.9	32.7258	9.79074	0.102137	17205.7	794	185.8	132	21.6696	1.40758	0.710441
330578	8042.5	3508.1	165.3	41.1039	21.2226	0.0471195	206473	5401.1	1012.8	484.5	38.228	2.0904	0.478377
49285.1	1639.7	358	203.8	30.0574	1.75662	0.569274	83027.3	1792.3	670.3	165.9	46.3244	4.04039	0.247501
181212	2914.9	1037.2	238.1	62.1676	4.35615	0.22956	68062.3	1827.9	591.8	192.7	37.2352	3.07109	0.325617
21246	775.8	178	166.5	27.3859	1.06907	0.935393	8825.9	573.8	169.6	87.5	15.3815	1.93829	0.51592
103934	2862.5	812.2	331.6	36.3087	2.44934	0.408274	66759.5	2030.5	582.7	259.2	32.8784	2.24807	0.444826
47566.6	1317.5	366.2	185.3	36.1037	1.97625	0.506008	80634.6	2797.6	850.1	302.3	28.8228	2.81211	0.355605
264164	2895.9	715.7	517.2	91.2199	1.3838	0.722649	10666.1	605	251.4	64.7	17.6299	3.88563	0.257359
164970	4805.5	905.8	511.4	34.3294	1.77122	0.564584	153868	4241.1	996	303.5	36.2801	3.28171	0.304719
12415.1	623.3	221	76.7	19.9183	2.88136	0.347059	167565	3634.8	1163.3	274.8	46.1003	4.23326	0.236225
229727	3355.6	727.9	553.3	68.4608	1.31556	0.760132	11112.2	587.7	188.6	81.5	18.9079	2.31411	0.432131
115234	4752.5	970.1	184.3	24.2469	5.2637	0.18998	41427.5	1203.5	295.8	221.6	34.4225	1.33484	0.749155
202570	2706.7	886	314.5	74.8402	2.81717	0.354966	109328	3174.7	639	351.8	34.4371	1.81637	0.550548
198697	2999.3	887.8	312.7	66.2477	2.83914	0.352219	94717.5	3211	1093	174.9	29.4978	6.24929	0.160018
578170	3422	1061.2	733.8	168.957	1.44617	0.691481	10463.3	631.2	230.7	66.9	16.5768	3.44843	0.289987
485921	6848.3	2987.4	223.9	70.955	13.3426	0.0749481	280888	7657.6	1337.5	572.3	36.6809	2.33706	0.427888
12470.8	592	201.7	81.7	21.0655	2.46879	0.405057	147440	2819.1	835.2	269.8	52.3003	3.09563	0.323036
49305.4	1814.7	498.5	216	27.17	2.30787	0.4333	23927.8	1146.1	266.3	149.6	20.8776	1.78008	0.561772
15553.1	831.9	315.7	80.7	18.6959	3.91202	0.255622	125489	3396.5	1060.7	209.2	36.9466	5.07027	0.197228
1.69588e+06	14856.3	3201.8	1403.2	114.152	2.28178	0.438253	48225.6	1116.2	417.2	165.4	43.2052	2.52237	0.396453
214889	4234.1	891.3	454.3	50.7519	1.96192	0.509705	254065	4803.3	1709.8	408.6	52.8939	4.18453	0.238975
192816	5738.1	1421.7	328.7	33.6028	4.32522	0.231202	360605	5463.1	1522.8	352.5	66.0073	4.32	0.231481
671174	5436.9	1091.8	856.2	123.448	1.27517	0.78421	104496	2320.9	750.7	248.9	45.0241	3.01607	0.331557
607608	5311.3	1323.6	668.6	114.399	1.97966	0.505138	70404.4	1797.6	415	258.7	39.1658	1.60417	0.623373
8978	538.7	238.9	49.7	16.666	4.80684	0.208037	113155	2638.8	1016.4	174.4	42.8812	5.82798	0.171586
49128	1417.1	382.7	200.9	34.668	1.90493	0.524954	18615	609.2	186.6	130.5	30.5565	1.42989	0.699357
336550	8644	1674.4	873.6	38.9345	1.91667	0.521739	173674	2187.1	738.6	316.4	79.4083	2.33439	0.428378
15041	727.5	330.2	60.1	20.6749	5.49418	0.182011	289257	5185.6	1114.1	527.1	55.7809	2.11364	0.473117
10260.6	623.5	241.3	56.5	16.4565	4.2708	0.234148	65877.4	2845.7	1221.8	107.5	23.1498	11.3656	0.0879849
41574.5	1405.5	359.4	186.6	29.5799	1.92605	0.519199	92370.3	1980.1	498	261.7	46.6493	1.90294	0.525502
476472	9274	1951.4	766.5	51.3772	2.54586	0.392795	9971.6	504	169.7	81	19.7849	2.09506	0.477313
19907.7	2081.4	554.2	197.8	9.56457	2.80182	0.356911	131684	2841.3	822.2	234.4	46.3463	3.50768	0.285089
384396	4470.9	1092.5	519.3	85.9772	2.10379	0.475332	11735.8	608.7	207.3	88.6	19.2801	2.33973	0.4274
90266.5	1923.2	744.1	165	46.9356	4.5097	0.221744	147171	3315.8	768.9	352.4	44.3848	2.1819	0.458317
12633.1	860.3	405.7	41.9	14.6845	9.68258	0.103278	7644.7	620.1	249.8	52.5	12.3282	4.7581	0.210168
53827.3	1885.8	503.1	194	28.5435	2.5933	0.385609	25048.1	1393.7	488.7	84	17.9724	5.81786	0.171885
725665	10947.2	3088.7	331.3	66.2878	9.32297	0.107262	72984.8	1589.5	422	242.8	45.9168	1.73806	0.575355
191894	3992.4	1249.1	333.7	48.0647	3.74318	0.267152	68244.8	2413	616.2	341.5	28.2821	1.80439	0.554203
14366.8	609.3	207.7	103.1	23.5792	2.01455	0.496389	30153	812.3	255.4	163.4	37.1205	1.56304	0.639781
72381.5	2233.8	857.9	117	32.4029	7.33248	0.13638	46268.8	1083.6	327.3	185.5	42.6992	1.76442	0.566758
225889	2657.5	820.8	386.3	85.0007	2.12477	0.470638	119796	2267.1	453	426.7	52.8411	1.06164	0.941943
30928.7	902.2	303.3	136.3	34.2814	2.22524	0.44939	16374.3	819.7	330.7	86.3	19.976	3.83198	0.260962
125600	1762.3	456	362.7	71.2708	1.25724	0.795395	63717.8	1468	306.9	291.9	43.4045	1.05139	0.951124
341569	3642.6	969.2	580.9	93.7706	1.66845	0.59936	51546.1	1265.8	313	258.6	40.7222	1.21036	0.826198
56564.8	2048.7	1024.7	74	27.6101	13.8473	0.0722163	20916.5	755.2	219.4	140.6	27.6966	1.56046	0.640839
221023	3622.1	1261.8	267.3	61.0206	4.72054	0.21184	248337	4457.7	870.6	529.9	55.7096	1.64295	0.608661
26041.7	1030.4	311.7	144.3	25.2734	2.16008	0.462945	324429	3641.5	821.1	530.3	89.0922	1.54837	0.645841
299411	4816.4	1077.6	566.4	62.165	1.90254	0.525612	164823	2101.9	508.3	427.5	78.4161	1.18901	0.841039
26168.5	877.7	210.7	174.1	29.8149	1.21022	0.826293	236860	3112.1	1147.7	279.5	76.1093	4.10626	0.243531
8253.1	462.2	164.1	67.9	17.8561	2.41679	0.413772	410164	6867.5	1284.3	761.7	59.7253	1.6861	0.593086
78459.8	1871.8	711	172.3	41.9168	4.12652	0.242335	12197.1	638.8	177.1	102.2	19.0938	1.73288	0.577075
8719.4	480.9	198.8	61.8	18.1314	3.21683	0.310865	76188.7	1710.5	719	143.5	44.5418	5.01045	0.199583
12161.6	516.5	171.3	100.8	23.5462	1.6994	0.588441	55941.3	2528.6	459.6	301.8	22.1234	1.52286	0.656658
41701.2	1445.6	596.7	106.9	28.847	5.58185	0.179152	37448	940.5	251.6	195.6	39.8171	1.2863	0.777424
13134.9	878.3	304.8	64.1	14.9549	4.75507	0.210302	8754.9	874	425.9	30.1	10.017	14.1495	0.0706739
23476.6	1237.8	338.3	144.5	18.9664	2.34118	0.427136	28819.8	1510.5	650.4	94.7	19.0796	6.868	0.145603
197820	4187.5	1435.1	291.4	47.2405	4.92485	0.203052	21682	1017.8	421.3	71.7	21.3028	5.87587	0.170188
9799.2	631.7	219.9	80.5	15.5124	2.73168	0.366075	17910.3	1072	381.7	156.3	16.7074	2.4421	0.409484
202357	2600.1	976.7	275.2	77.8266	3.54906	0.281765	13652	626.3	216.1	98.7	21.7979	2.18946	0.456733
9733.3	589.4	202.5	71.8	16.5139	2.82033	0.354568	244641	4198.6	994.1	362.4	58.2673	2.7431	0.364551
87838.2	2186.7	797.6	198.9	40.1693	4.01006	0.249373	11325.1	660.7	227.4	78	17.1411	2.91538	0.343008
25945.4	1046.9	317.9	119	24.7831	2.67143	0.374332	248469	3547.5	1120.2	353.4	70.0405	3.16978	0.315479
196456	3075.6	767.8	460.6	63.8757	1.66696	0.599896	21261.2	948	231.4	149.6	22.4274	1.54679	0.6465
9444.4	448	157.8	79.2	21.0813	1.99242	0.501901	10509	583.9	182.6	88.5	17.9979	2.06328	0.484666
186834	5302.1	1464	300.7	35.2378	4.86864	0.205396	162136	3074.2	654.3	362.6	52.7409	1.80447	0.55418
12334	753.3	277.5	72.9	16.3733	3.80658	0.262703	25550	842	253.5	140.8	30.3444	1.80043	0.555424
198382	2579.5	970	272	76.9073	3.56618	0.280412	264250	5244.9	1671.5	423.7	50.3822	3.94501	0.253485
83787.7	2162.2	788.5	194.5	38.7511	4.05398	0.246671	48022.8	1372.5	344.2	204.3	34.9893	1.68478	0.59355
8019.9	565.9	195.4	62.4	14.1719	3.13141	0.319345	12445.5	893.4	192.7	110.3	13.9305	1.74705	0.572392
19593.4	738.1	259.6	101.3	26.5457	2.56269	0.390216	52696.9	1143.4	424.2	162.2	46.0879	2.61529	0.382367
190297	3279.7	760	455.7	58.0226	1.66776	0.599605	97576.6	2570.6	1007.5	136.3	37.9587	7.39178	0.135285
71479.1	1183.3	380.9	249.4	60.4066	1.52727	0.654765	34969	1021	319.8	153.3	34.2498	2.08611	0.479362
98768	2788.2	906.7	173.1	35.4236	5.23801	0.190912	172523	2443.6	773.4	321	70.6021	2.40935	0.41505
13829.4	827	380.9	53.1	16.7224	7.17326	0.139407	62774.9	1936.4	664	136.1	32.4184	4.87877	0.20497
203923	3670.7	710.4	449.9	55.5544	1.57902	0.633305	38492.3	1527.3	512.2	125.6	25.2028	4.07803	0.245217
204207	2716.7	585	491.8	75.1674	1.18951	0.840684	156656	2722.3	636.4	356.8	57.5454	1.78363	0.560654
127096	1854.7	558.1	327.7	68.5264	1.70308	0.587171	83235.2	2363.2	479	303.8	35.2214	1.5767	0.634238
9388.6	530.4	190.9	76.6	17.701	2.49217	0.401257
81050.3	3064.8	1266.6	121.1	26.4455	10.4591	0.0956103					36.106	2.93508	0.446542
102139	1941.3	644.4	212.3	52.6138	3.03533	0.329454					17.1817	1.99531	0.198374
41797.6	1576.1	668.6	98	26.5196	6.82245	0.146575
368959	6422.9	1756.5	409.1	57.4443	4.29357	0.232906
239850	2635.9	864.5	360.7	90.9938	2.39673	0.417235
88639.2	1999.8	631.1	205.7	44.324	3.06806	0.325939
26183.7	908.7	264.9	135.6	28.8145	1.95354	0.511891
20830.3	1032.9	463.8	59.5	20.1668	7.79496	0.128288
132678	2638.5	1166	154.9	50.2852	7.52744	0.132847
57284.7	1485.9	607.2	143.2	38.5522	4.24022	0.235837
45741.6	1484.8	448.1	142.1	30.8066	3.15341	0.317117
51865.5	1092.8	328.9	209.6	47.4611	1.56918	0.637276
70414.6	1763.3	658.5	149.3	39.9334	4.41058	0.226727
35734.5	1520.9	352.3	218.1	23.4956	1.61531	0.619075
17844.4	1622.1	687.3	39.8	11.0008	17.2688	0.0579078
370566	11736	2524.1	682.2	31.5752	3.69994	0.270275
7822.2	639.2	215.6	58.3	12.2375	3.69811	0.270408
33529.3	1706.9	480.7	131.1	19.6434	3.66667	0.272727
9312.6	459	177.2	69.3	20.2889	2.557	0.391084
28561.2	1096.5	447.8	89.5	26.0476	5.00335	0.199866
10904.4	662	150	134.8	16.4719	1.11276	0.898667
306646	8942	2922.4	441.4	34.2927	6.62075	0.15104
11345.4	485.9	178.7	83.4	23.3492	2.14269	0.466704
8273.3	591.3	230.4	61.1	13.9917	3.77087	0.265191
29250.7	911.5	384	100.5	32.0907	3.8209	0.261719
150791	3134.6	1304.3	156.1	48.1052	8.35554	0.119681
35663.5	1494.2	564	140.1	23.868	4.0257	0.248404
14153.9	613.3	241	78.6	23.0783	3.06616	0.326141
7796.8	492.6	218.3	47.9	15.8279	4.55741	0.219423
254339	6746.4	2758.9	499	37.7	5.52886	0.180869
7619.4	542.7	239.8	47.1	14.0398	5.0913	0.196414
23699.6	899.2	319.8	100.7	26.3563	3.17577	0.314884
71043.2	2358.4	1134.3	84.4	30.1235	13.4396	0.0744071
132606	2486.8	1069.3	176.3	53.3242	6.06523	0.164874
26325.6	767.9	234.8	150.1	34.2826	1.56429	0.639267
70211.8	2914.4	765.3	226.5	24.0913	3.37881	0.295962
54440.7	1731.1	615.7	129.4	31.4486	4.75811	0.210167
31035.1	1556.7	637.2	68.3	19.9365	9.32943	0.107188
489728	7145.8	1563.5	620.2	68.5337	2.52096	0.396674
12562.1	618	210.1	80.4	20.327	2.61318	0.382675
8471	817.2	346.7	37.2	10.3659	9.31989	0.107297
17565.6	634.1	165.1	142	27.7016	1.16268	0.860085
199427	5750.3	1146	684.4	34.6811	1.67446	0.597208
82256.8	2679.7	1125.1	114.7	30.6963	9.80907	0.101946
18919.2	724.4	288.2	89.2	26.1171	3.23094	0.309507
58906.9	3008.1	966.2	265.7	19.5828	3.63643	0.274995
67200.5	1566.3	594.6	157.1	42.904	3.78485	0.264211
390672	9217.2	2515.2	666.4	42.3851	3.77431	0.264949
243237	7038.8	1776.4	274	34.5566	6.48321	0.154245
37574.7	2255.9	879.4	194.5	16.6562	4.52134	0.221174
7705.6	699.4	277	46.7	11.0174	5.93148	0.168592
24313	996.4	397.4	82.7	24.4008	4.80532	0.208103
265588	2639.2	669.1	550.4	100.632	1.21566	0.822598
187792	5038.3	1857	254.1	37.273	7.30815	0.136834
208881	4179.1	1676.4	230.2	49.9824	7.28236	0.137318
239734	4952.2	1661.9	352.1	48.4096	4.71997	0.211866
95995	1434.9	456.3	284.5	66.9001	1.60387	0.623493
17165.1	1560.3	754.1	36.8	11.0012	20.4918	0.0487999
8288.5	937.5	442.1	28.8	8.84107	15.3507	0.0651436
199457	3642.5	970.6	281	54.7583	3.45409	0.289512
35846	1615.1	446.6	134.4	22.1943	3.32292	0.30094
127152	3580.8	1237.9	260.8	35.5093	4.74655	0.210679
19238.5	1044.8	424.1	67.1	18.4136	6.32042	0.158217
91037.1	2003.9	626.5	202.2	45.43	3.09842	0.322745
24642.6	1079	492.7	70.4	22.8384	6.99858	0.142886
21965.9	1409.8	499.6	69.7	15.5809	7.16786	0.139512
7898.2	441	180.4	58.1	17.9098	3.10499	0.322062
409363	4997.2	1289.6	555.6	81.9184	2.32109	0.430831
25651.4	981.1	301.4	146.4	26.1456	2.05874	0.485733
42644.2	1131.7	400.5	179.2	37.6815	2.23493	0.447441
146806	5924.7	1667	321.2	24.7786	5.18991	0.192681
8187.2	520	176.1	83.4	15.7446	2.11151	0.473595
27446	995.1	425.3	89.1	27.5811	4.77329	0.209499
63018.2	1314.2	376.9	232.3	47.9518	1.62247	0.616344
360549	5477.6	2211.5	311.5	65.8224	7.09952	0.140855
146568	3591.2	970.3	367.6	40.813	2.63955	0.378852
22417.1	786.4	281.5	111.1	28.506	2.53375	0.394671
64711.4	3269.2	1094	149	19.7943	7.34228	0.136197
101759	1965.9	433.9	355.9	51.762	1.21916	0.820235
153903	4582.8	1973.8	114.1	33.5828	17.2989	0.0578073
12709.1	888.4	405.6	41.8	14.3056	9.70335	0.103057
57360.7	1172.9	339.2	231.4	48.905	1.46586	0.682193
45351.2	2453.7	772.9	163.3	18.4828	4.73301	0.211282
1.09818e+06	15854.1	1821.1	1226.2	69.2678	1.48516	0.673329
28140.5	919	250.9	156	30.6208	1.60833	0.621762
34279.6	895	302.1	151.9	38.3012	1.98881	0.502814
13662.1	802.7	372.7	51.9	17.0202	7.18112	0.139254
99619.6	3102.1	1049.2	322.2	32.1136	3.25636	0.307091
43546.5	1193.5	464.3	130.8	36.4864	3.54969	0.281714
347738	7134.8	1469.4	586.1	48.7384	2.50708	0.39887
13368.1	835.8	297.1	66.6	15.9944	4.46096	0.224167
27288.8	1549.4	736.5	52.3	17.6125	14.0822	0.0710115
84502.5	3090.4	673.8	495.2	27.3435	1.36066	0.734936
27613.3	1818.6	695.4	63.8	15.1838	10.8997	0.0917458
123897	2609.2	967.9	195.3	47.4847	4.95597	0.201777
17362.8	911.5	330.4	80.2	19.0486	4.1197	0.242736
11127.4	666	221.1	75.6	16.7078	2.9246	0.341927
23512.1	832.1	273.3	117.7	28.2563	2.32201	0.430662
643094	10802.7	3087.1	426.8	59.5309	7.23313	0.138253
8460.9	679.5	291.2	44.1	12.4517	6.60317	0.151442
12252.8	786.4	332	52.4	15.5809	6.33588	0.157831
15943.4	807.6	253.7	113.3	19.7417	2.23919	0.44659
8831	779.6	295	49.3	11.3276	5.98377	0.167119
7994.5	752.1	272.1	44.7	10.6296	6.08725	0.164278
213043	5005.8	891	401.5	42.5593	2.21918	0.450617
744422	8856.3	2106.9	551.2	84.0557	3.82239	0.261617
29123.9	1063.9	371.6	105.8	27.3747	3.51229	0.284715
512455	5405.8	1437	538.3	94.7972	2.66952	0.3746
63596.2	1873.6	626.4	154.9	33.9433	4.0439	0.247286
32905.8	993.6	338.7	133.8	33.1178	2.53139	0.39504
117317	2182.4	897.5	186	53.756	4.82527	0.207242
87331.3	2456.7	1175.2	100.4	35.5482	11.7052	0.0854323
8582.6	457.4	161.6	70	18.7639	2.30857	0.433168
51992.2	2100	990.2	78.1	24.7582	12.6786	0.078873
397449	7459.2	1497.3	745.7	53.2831	2.00791	0.49803
13155.2	610	236.2	84	21.5659	2.8119	0.355631
15289.4	710.8	288	72.3	21.5101	3.9834	0.251042
25453.7	965.5	210	179.7	26.3632	1.16861	0.855714
8795.5	495.8	168.4	74	17.74	2.27568	0.43943
136272	4210.2	692.6	444.5	32.367	1.55816	0.641785
435105	7618.8	1883.5	841.1	57.1094	2.23933	0.446562
9201	647.7	237.4	57.8	14.2057	4.10727	0.243471
233803	4470.1	1140.9	312.1	52.3037	3.65556	0.273556
25671.7	1091.9	352.5	124.5	23.511	2.83133	0.353191
57173.2	1599.5	359	231.8	35.7444	1.54875	0.645682
17312.1	1598.9	444.6	69.2	10.8275	6.42486	0.155646
105733	3095.9	879.8	293.9	34.1527	2.99354	0.334053
21023	1524.2	279.2	168.8	13.7928	1.65403	0.604585
71002.6	2003.3	742.1	132.4	35.4428	5.60498	0.178413
380300	7983.1	1264.4	727.3	47.6381	1.73848	0.575214
327795	3698.3	1252.6	384.6	88.634	3.25689	0.307041
159343	3827.2	1016	216.7	41.6343	4.68851	0.213287
42978.7	965.6	269.2	210.4	44.5098	1.27947	0.781575
31628.3	1482.1	378.8	190.2	21.3402	1.99159	0.502112
103305	2478.2	1154.3	119.6	41.6855	9.65134	0.103613
15370.6	687.2	239.9	87.5	22.367	2.74171	0.364735
53969.3	1894.2	382.9	201.5	28.4919	1.90025	0.526247
91047.2	2625.2	1141.9	170.5	34.682	6.69736	0.149313
90104.3	1728.5	554.4	220	52.1286	2.52	0.396825
232038	6157.4	1258.4	618.8	37.6845	2.03361	0.491736
19902.6	679.3	201.2	134.5	29.2987	1.49591	0.668489
155262	3007.4	1051	214.4	51.6266	4.90205	0.203996
130741	2109.6	747.5	237.7	61.9743	3.14472	0.317993
870266	9565.3	2063.6	871.4	90.9816	2.36814	0.422272
212004	2714.3	601.6	484.1	78.1064	1.24272	0.804688
20419.7	865.2	356.1	79.5	23.6011	4.47925	0.223252
102296	4894.8	1561.2	203.8	20.899	7.66045	0.130541
176650	3079.8	670.7	379.6	57.3576	1.76686	0.565976
25615.9	1273.3	504.3	73.1	20.1177	6.89877	0.144953
27126.6	1320	505.3	78.2	20.5505	6.46164	0.15476
461735	5340.8	950.5	732.3	86.4543	1.29797	0.770437
9571.1	584.9	178.6	79.8	16.3637	2.2381	0.446809
74505.6	2938.3	1203.9	161.6	25.3567	7.44988	0.13423
21099	1293.2	230.1	154.5	16.3153	1.48932	0.671447
21950.7	1092.4	315.4	116.1	20.094	2.71662	0.368104
35835.9	1209.3	479	100	29.6336	4.79	0.208768
29940.1	966.8	306.7	135.1	30.9682	2.27017	0.440496
154948	2418.5	888.7	228	64.0676	3.89781	0.256555
46552.7	1468.9	580.9	116.9	31.6922	4.9692	0.201239
178186	5853.7	1579.6	409.7	30.4399	3.8555	0.259369
27780.5	1515.4	682.4	85.2	18.3321	8.00939	0.124853
61020.9	2899.7	888.5	249	21.0439	3.56827	0.280248
66653	1994	643	165.3	33.4268	3.8899	0.257076
353401	4682.8	1225.1	585.1	75.4679	2.09383	0.477594
22330.9	869.2	345	86.3	25.6913	3.99768	0.250145
34147.8	1275.6	493.8	135.2	26.77	3.65237	0.273795
91300.7	2665.7	1182.9	107.6	34.2502	10.9935	0.0909629
8891.8	456.3	156.4	79	19.4867	1.97975	0.505115
37584.8	1485.1	572.3	99.5	25.3079	5.75176	0.17386
40129.7	1266.9	516.8	105.2	31.6755	4.91255	0.20356
140530	2148.2	607.8	396.2	65.4176	1.53407	0.651859
28176	1284.3	494.4	84.4	21.9388	5.85782	0.170712
31699.2	1399.1	512.8	117.7	22.6569	4.35684	0.229524
116440	1825.5	472.7	329.9	63.7853	1.43286	0.697906
85278.2	1941.2	954.7	119	43.9307	8.02269	0.124646
14164	563.3	189.5	105	25.1447	1.80476	0.55409
566632	12957	3491.6	570.4	43.7317	6.12132	0.163364
23431	673.5	223	143.3	34.7899	1.55618	0.642601
73588	1823.6	449.7	226.2	40.3531	1.98806	0.503002
10057.8	595.1	206.5	77.1	16.901	2.67834	0.373366
10438	653.1	180.2	89.7	15.9822	2.00892	0.49778
22062.2	1281	289.6	136.3	17.2226	2.12472	0.470649
431536	15095.7	2608.4	1492.8	28.5867	1.74732	0.572305
107893	2967.1	560.4	346.6	36.3631	1.61685	0.618487
16237.4	792.4	231.4	113.7	20.4914	2.03518	0.491357
93652.9	2246.4	461.9	301.9	41.6902	1.52998	0.653605
90428.7	1687.3	602.3	199.5	53.5937	3.01905	0.33123
290013	3747	1387.5	277.8	77.3986	4.9946	0.200216
28439.6	893	296.6	142	31.8473	2.08873	0.478759
24201.5	662.5	210.3	151.7	36.5306	1.38629	0.72135
10818.2	607.1	170.2	104.4	17.8195	1.63027	0.613396
74039.2	1719	398	260.8	43.0711	1.52607	0.655276
201399	3418.8	869.3	390.1	58.9092	2.2284	0.448752
35896.7	2218.9	523.8	162.9	16.1777	3.21547	0.310997
22305.5	846.7	304.5	100.6	26.344	3.02684	0.330378
10458.3	600.7	178.2	100.4	17.4102	1.7749	0.563412
10686.4	500.7	156.6	94.2	21.3429	1.66242	0.601533
28140.5	1257.5	513.8	82.4	22.3781	6.23544	0.160374
37843.4	1145.5	419.6	126	33.0366	3.33016	0.300286
138761	2546.2	711.7	355.8	54.4972	2.00028	0.49993
17545.3	688.4	254.4	91.2	25.4871	2.78947	0.358491
106686	5313.4	1209.9	252.9	20.0787	4.7841	0.209026
125028	3350.6	556.7	479.9	37.315	1.16003	0.862044
30016.2	1200.7	445.9	114.7	24.9989	3.88753	0.257233
262040	6055.7	2638	169.2	43.2715	15.591	0.0641395
54450.9	1901.8	849.4	90.4	28.6312	9.39602	0.106428
97759.1	1689	588.5	217	57.8799	2.71198	0.368734
12110.9	575.9	216.5	74.7	21.0295	2.89826	0.345035
43211.9	1320.8	302.1	231.5	32.7165	1.30497	0.766303
19760.7	846.6	367.5	79.2	23.3412	4.64015	0.21551
13717.9	845.9	287.1	138	16.2169	2.08043	0.480669
219912	3135.3	1020.4	295.9	70.1408	3.44846	0.289984
169071	3615.9	865.2	516.6	46.7577	1.6748	0.597087
10402.5	637	187.9	78.7	16.3305	2.38755	0.41884
17038.4	1006	393.1	60.1	16.9368	6.54077	0.152887
