# Supplementary material for: Charcoal morphologies and morphometrics of a Eurasian grass-dominated system for robust interpretation of past fuel and fire type
Source: Copernicus journal article supplement (doi:10.5194/bg-20-5069-2023), 2023-12-19
Supplement: Supplementary file 2 [file bg-20-5069-2023-supplement.zip]

Archive with 3 entries (3 files):
- Supplement_File_S2.docx
- bg-20-5069-2023-supplement-title-page.pdf
- Supplement_File_S1.xlsx
